# Supplementary material for: Conceptual design of tetraazaporphyrin- and subtetraazaporphyrin-based functional nanocarbon materials: electronic structures, topologies, optical properties, and methane storage capacities
Source: Royal Society of Chemistry journal article supplement (doi:10.1039/c5cp07552a), 2016-01-01
Supplement: c5cp07552a1.pdf [file c5cp07552a1.pdf]

## Supporting Information for manuscript

# Phthalocyanine- and subphthalocyanine-based functional nanocarbon materials: electronic structures and optical properties

*Rodion V. Belosludov<sup>†\*</sup>, Hannah M. Rhoda<sup>‡</sup>, Yoshiyuki Kawazoe<sup>§</sup>, Victor N. Nemykin<sup>‡\*</sup>*

<sup>†</sup> Institute for Materials Research, Tohoku University, Sendai, 980-85577,

<sup>‡</sup> Department of Chemistry and Biochemistry, University of Minnesota Duluth, Duluth,  
Minnesota, 55812.

<sup>§</sup> Institute of Thermophysics, SB RAS, Novosibirsk, 630090, Russia.

<sup>§</sup> New Industry Creation Hatchery Center, Tohoku University, 6-6-4 Aoba, Aramaki,  
Sendai – 980-8579, Japan.

---

Corresponding authors: [rodion@imr.tohoku.ac.jp](mailto:rodion@imr.tohoku.ac.jp) (RVB) and [vnemyin@d.umn.edu](mailto:vnemyin@d.umn.edu) (VNN)

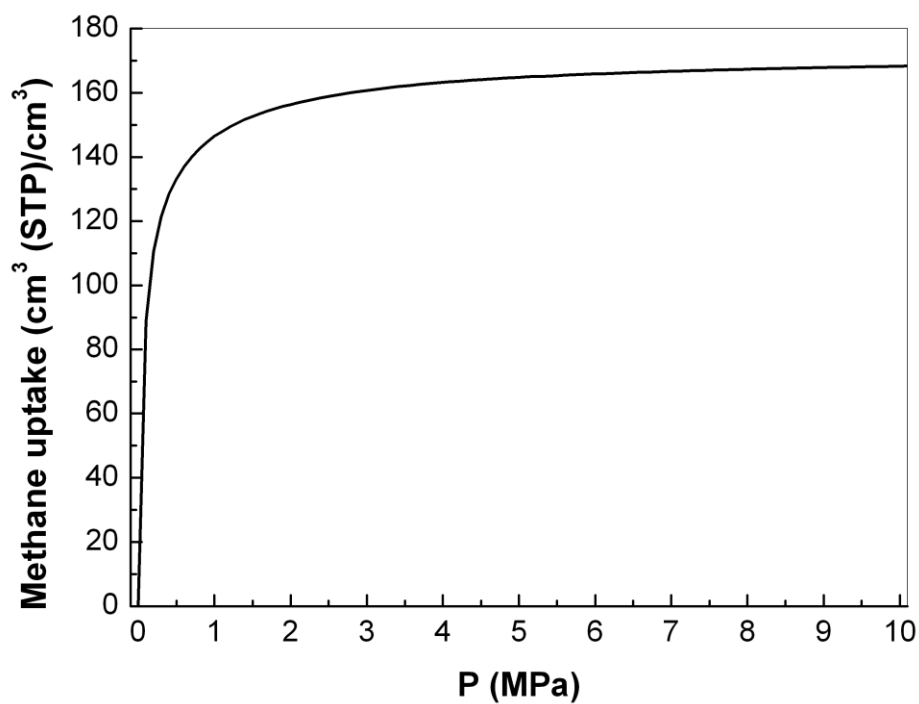

**Figure S1.** Adsorption isotherm of CH<sub>4</sub> in gas clathrate hydrate at T=298 K.

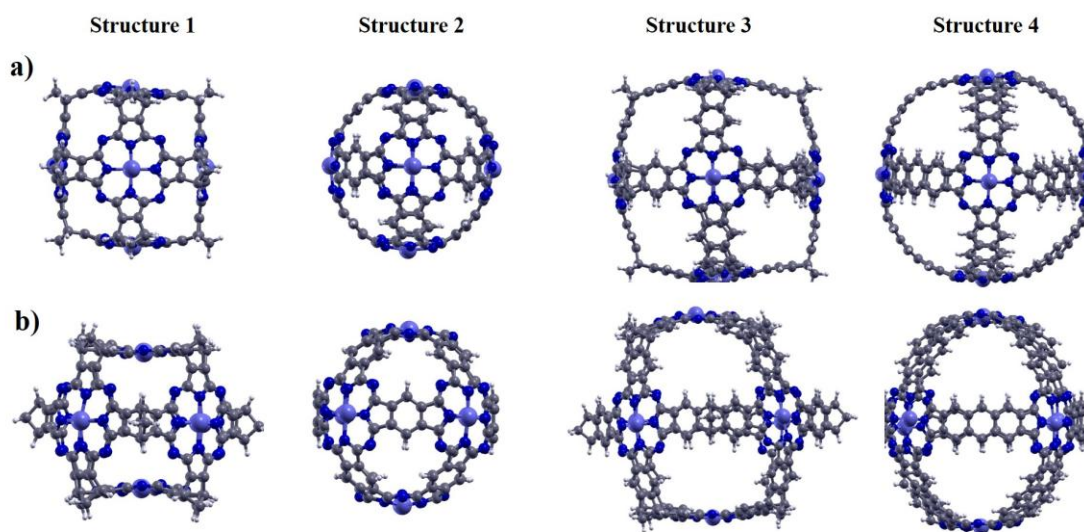

**Figure S2.** Structures of the nanocages 1-4 after *ab initio* MD simulations: (a)-(b) perspective views.

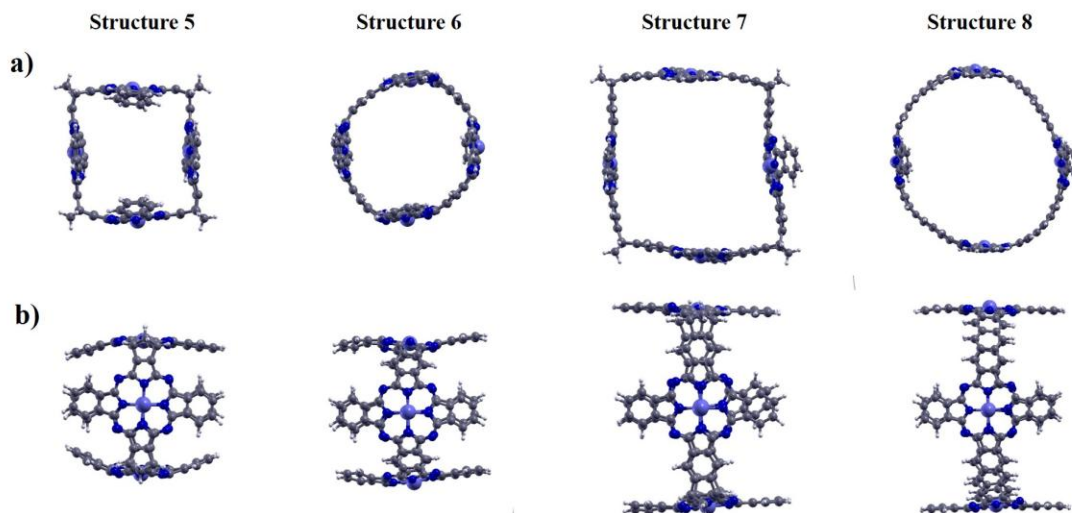

**Figure S3.** Structure of the nanobarrels **5-8** after *ab initio* MD simulations: (a)-(b) perspective views.

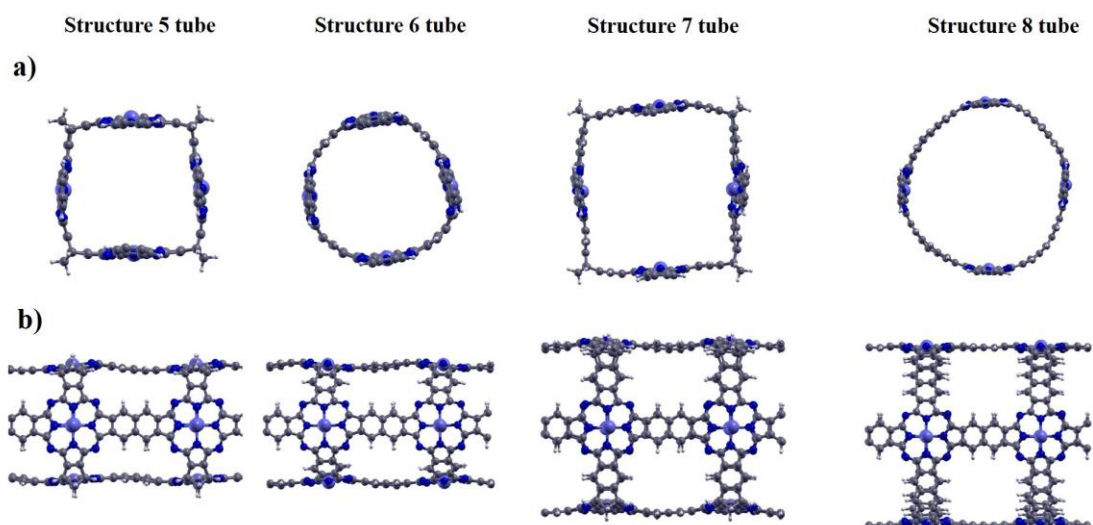

**Figure S4.** Structures of the nanotubes **5t-8t** after *ab initio* MD simulations: (a)-(b) perspective views.

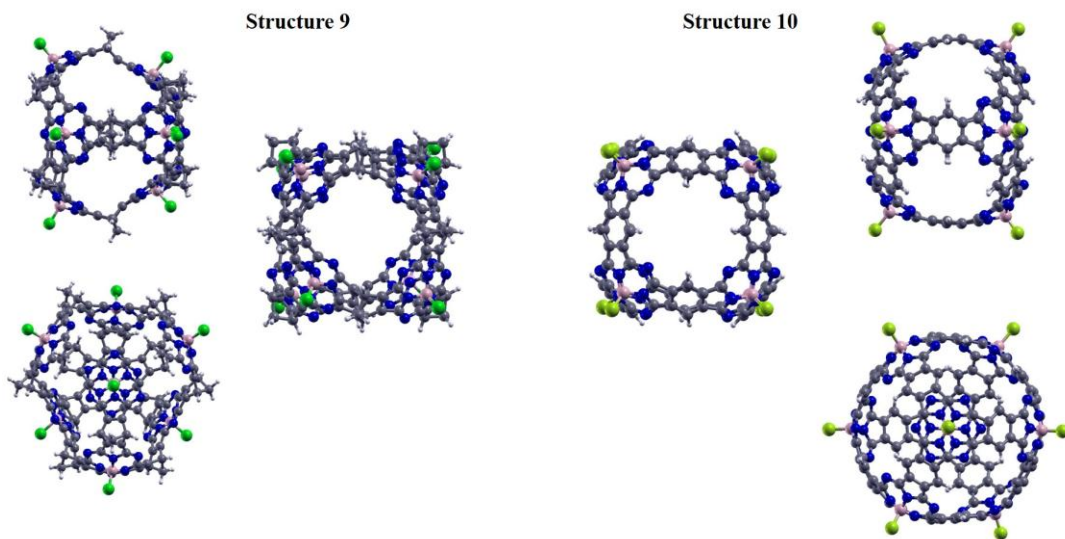

**Figure S5.** Perspective views of nanocages **9-10** after *ab initio* MD simulations.

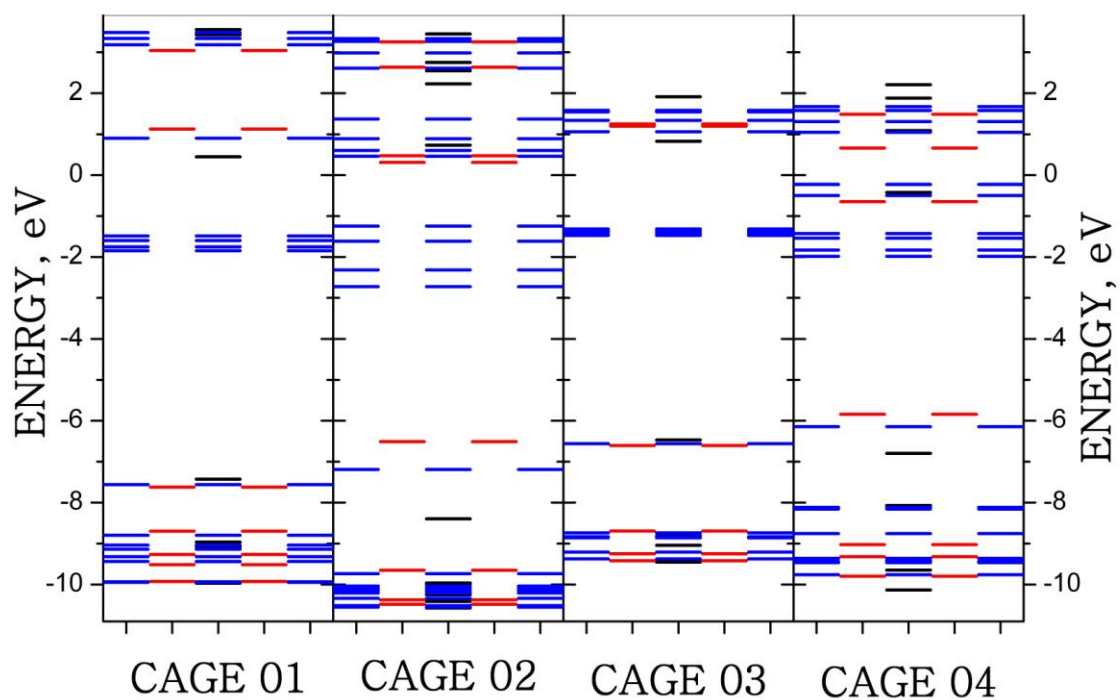

**Figure S6:** DFT predicted energy diagram for nanostructures **1 - 4**.

### Cube<sub>n</sub> structure, MOs

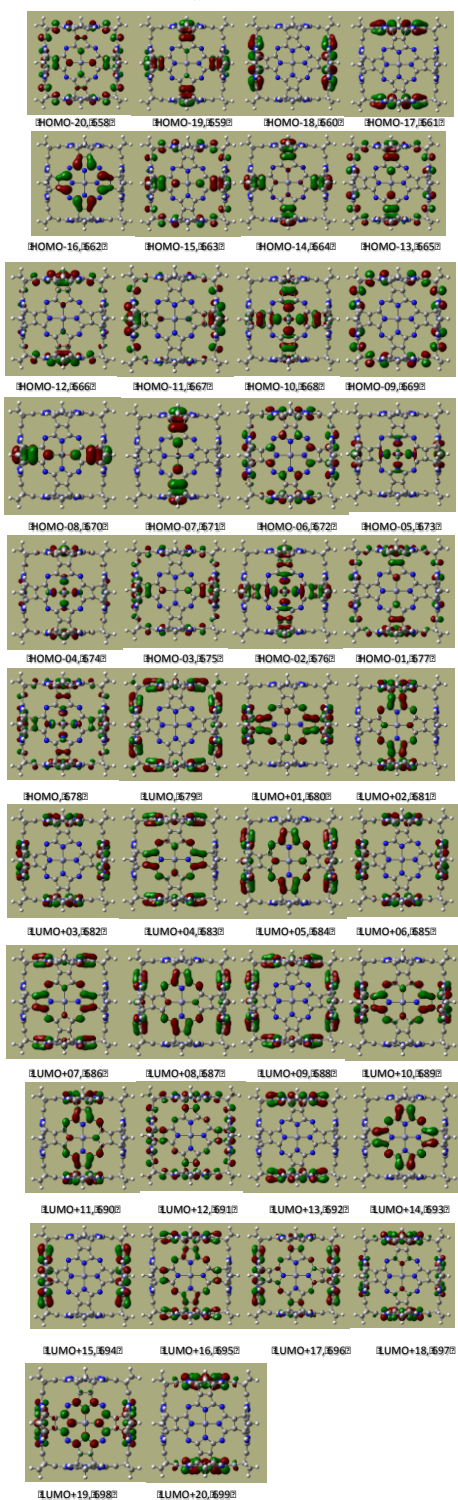

Figure S7. DFT predicted MOs for nanostructure 1.

Cube<sub>h</sub> Structure 2, MOs

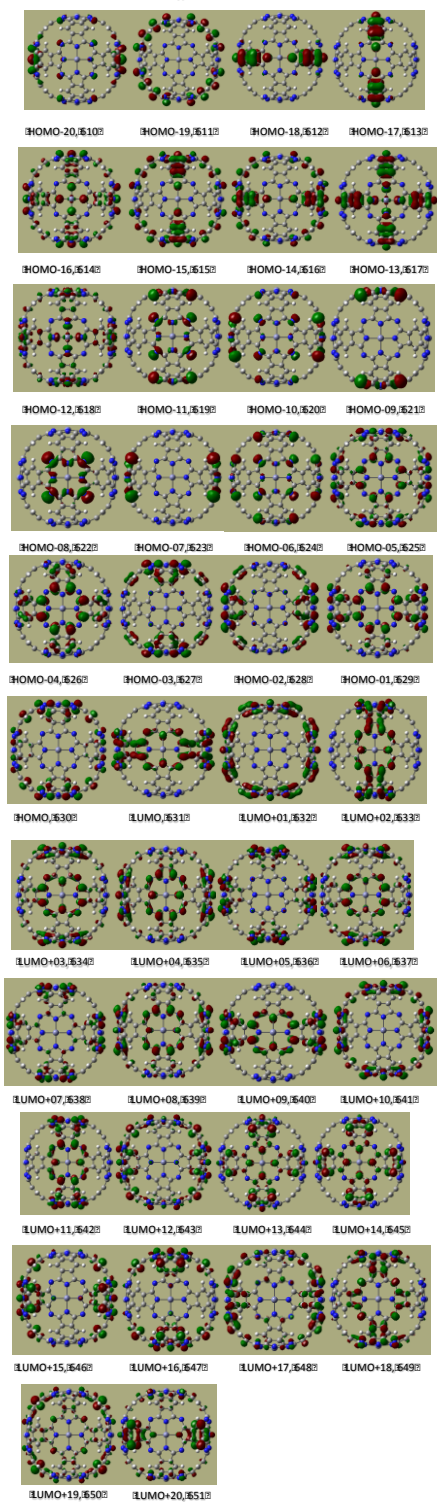

Figure S8. DFT predicted MOs for nanostructure 2.

### Cube<sub>h</sub> structure MOs

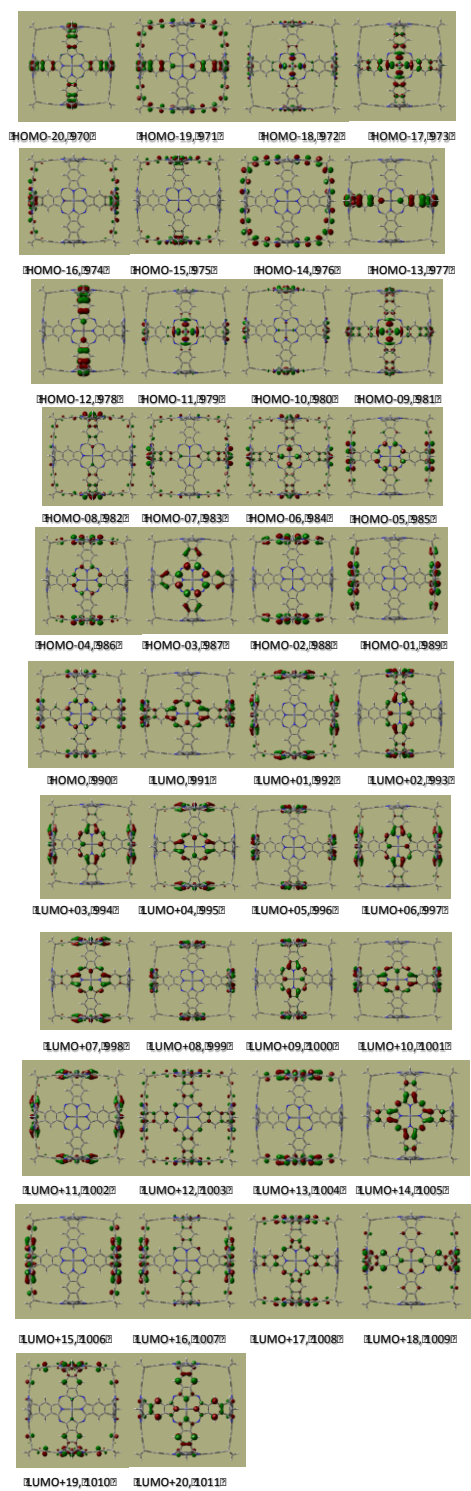

Figure S9. DFT predicted MOs for nanostructure 3.

### Cube<sub>h</sub> structure, MOs

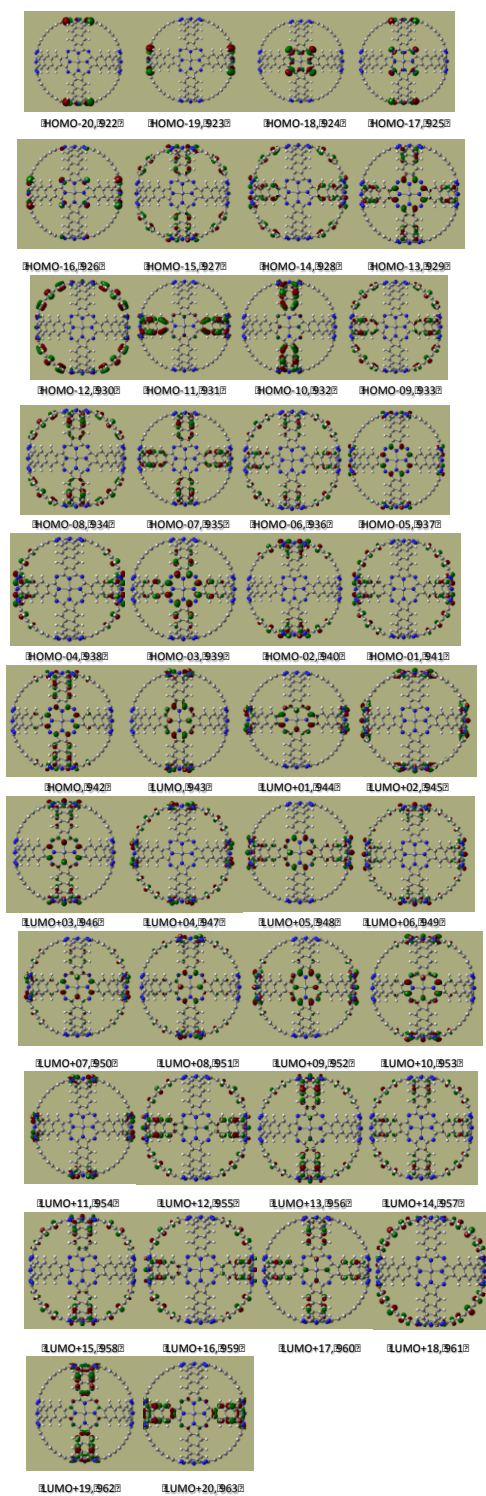

Figure S10. DFT predicted MOs for nanostructure 4.



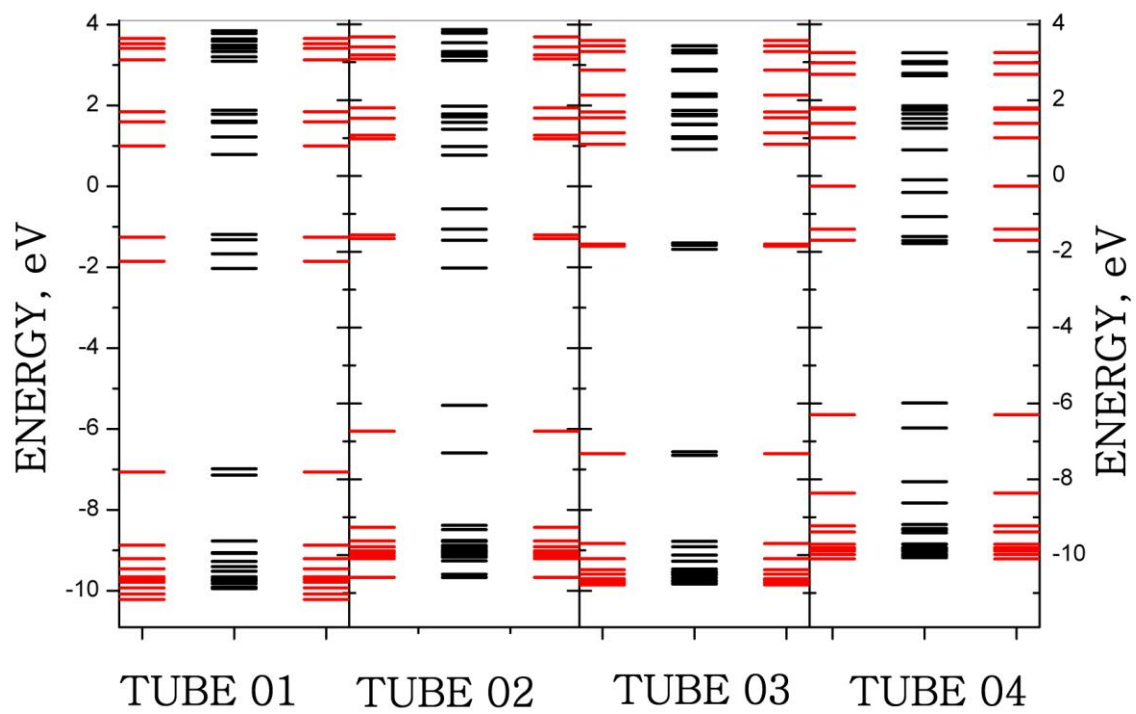

**Figure S11.** DFT predicted energy diagram for nanostructures 5-8.

### Tube<sub>4h</sub> Structure 7, MOs

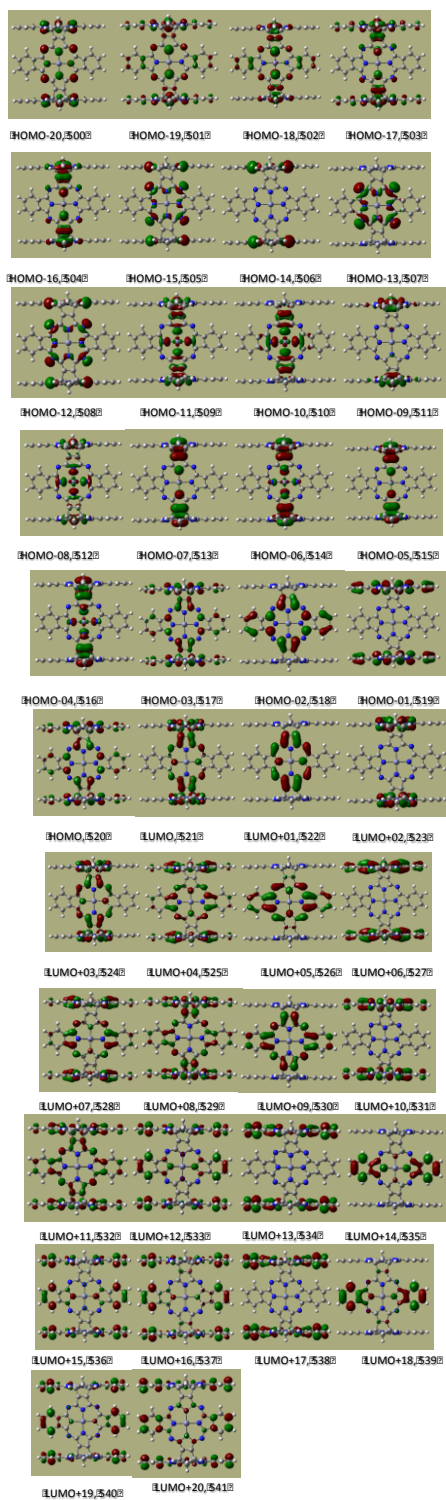

Figure S12. DFT predicted MOs of nanostructure 5.

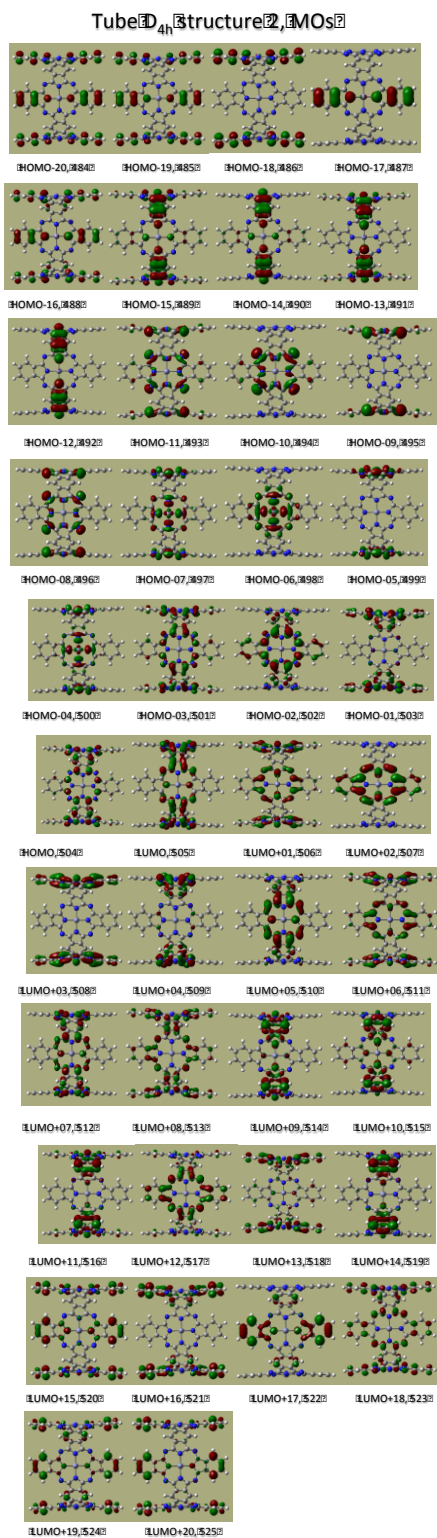

Figure S13. DFT predicted MOs of nanostructure 6.

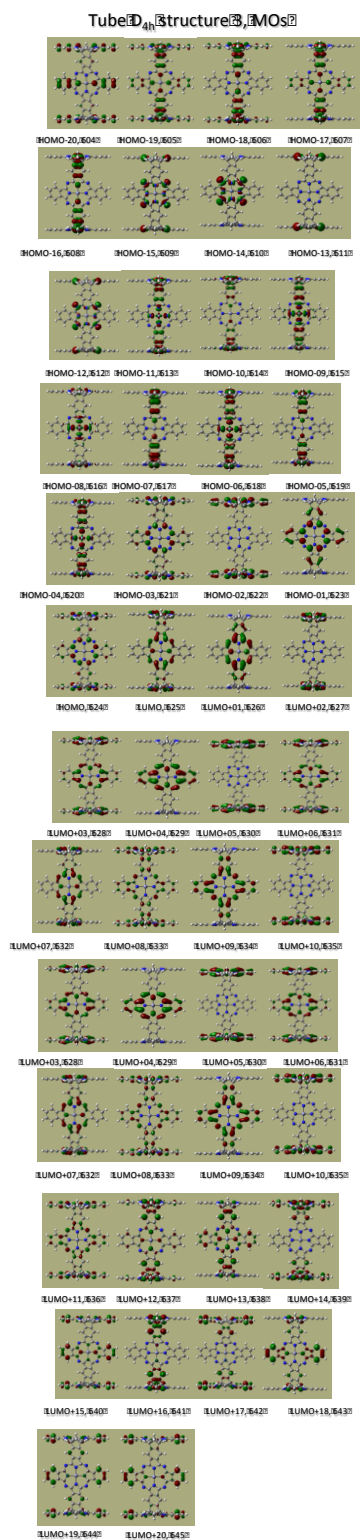

Figure S14. DFT predicted MOs of nanostructure 7.

Tube 41 structure MOs

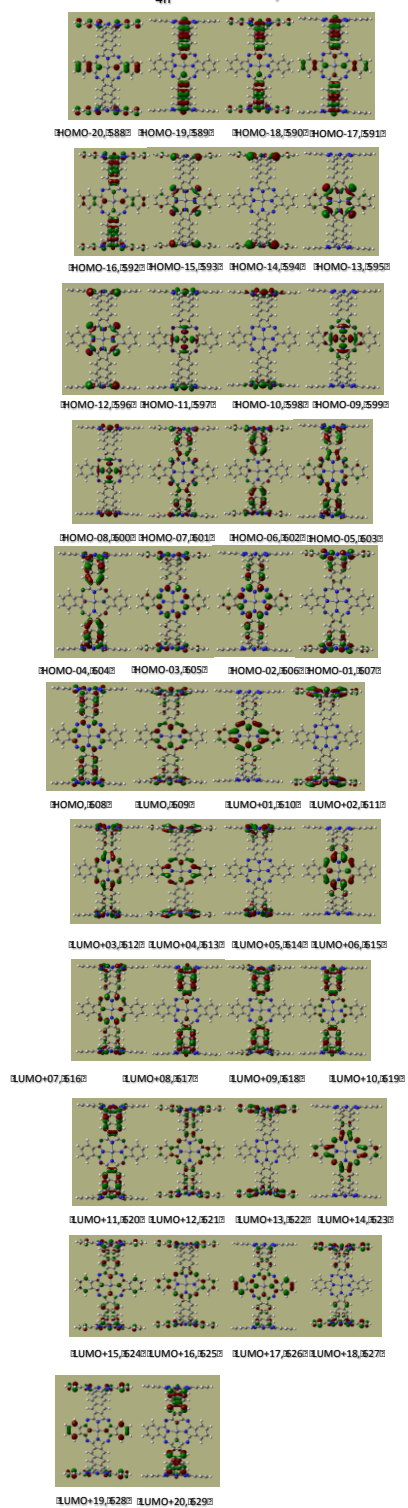

Figure S15. DFT predicted MOs of nanostructure 8.

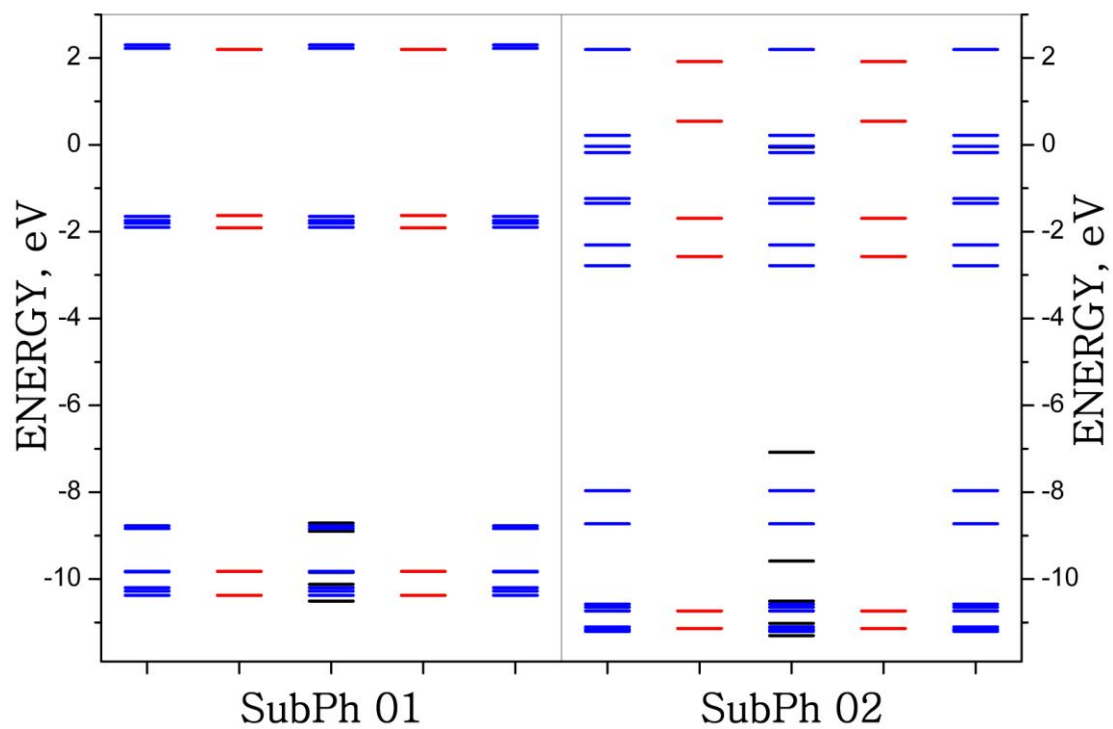

**Figure S16.** DFT predicted energy diagram of nanostructures **9** and **10**.

### SubPh<sub>10</sub> Structure MOs

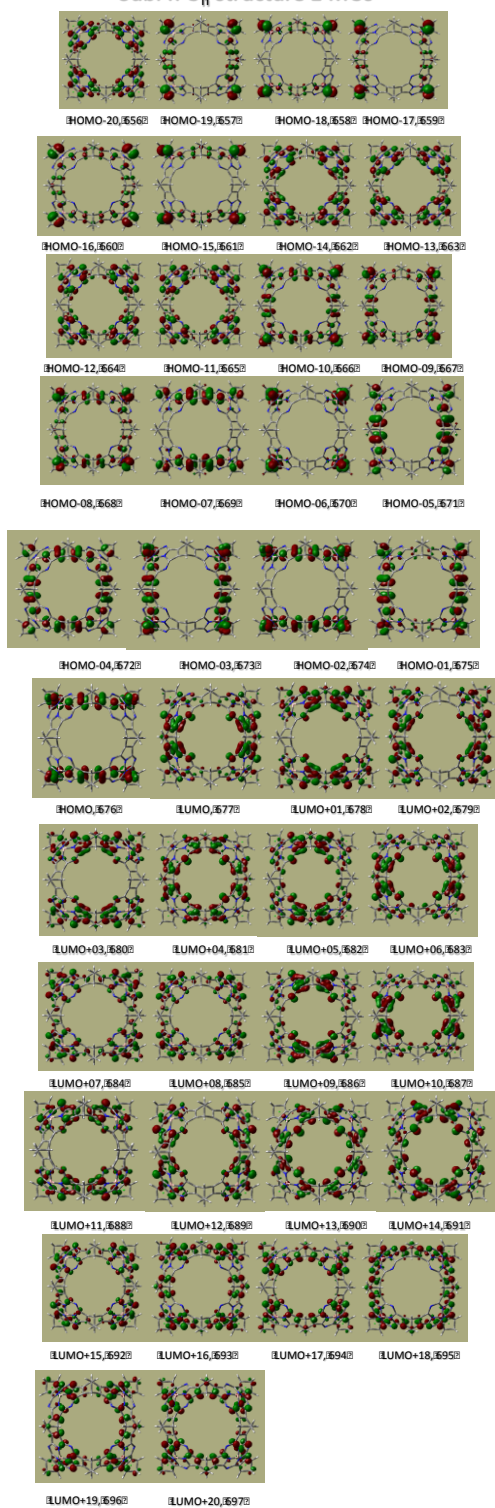

Figure S17. DFT predicted MOs for nanostructure 9.

### SubPh<sub>n</sub> structure 2, MOs

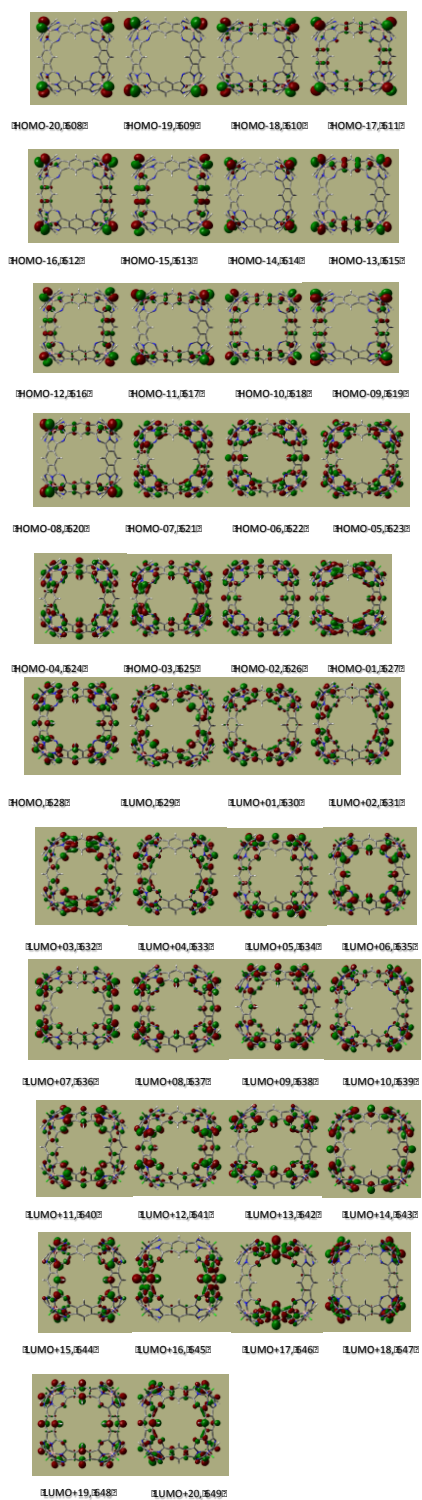

Figure S18. DFT predicted MOs for nanostructure 10.



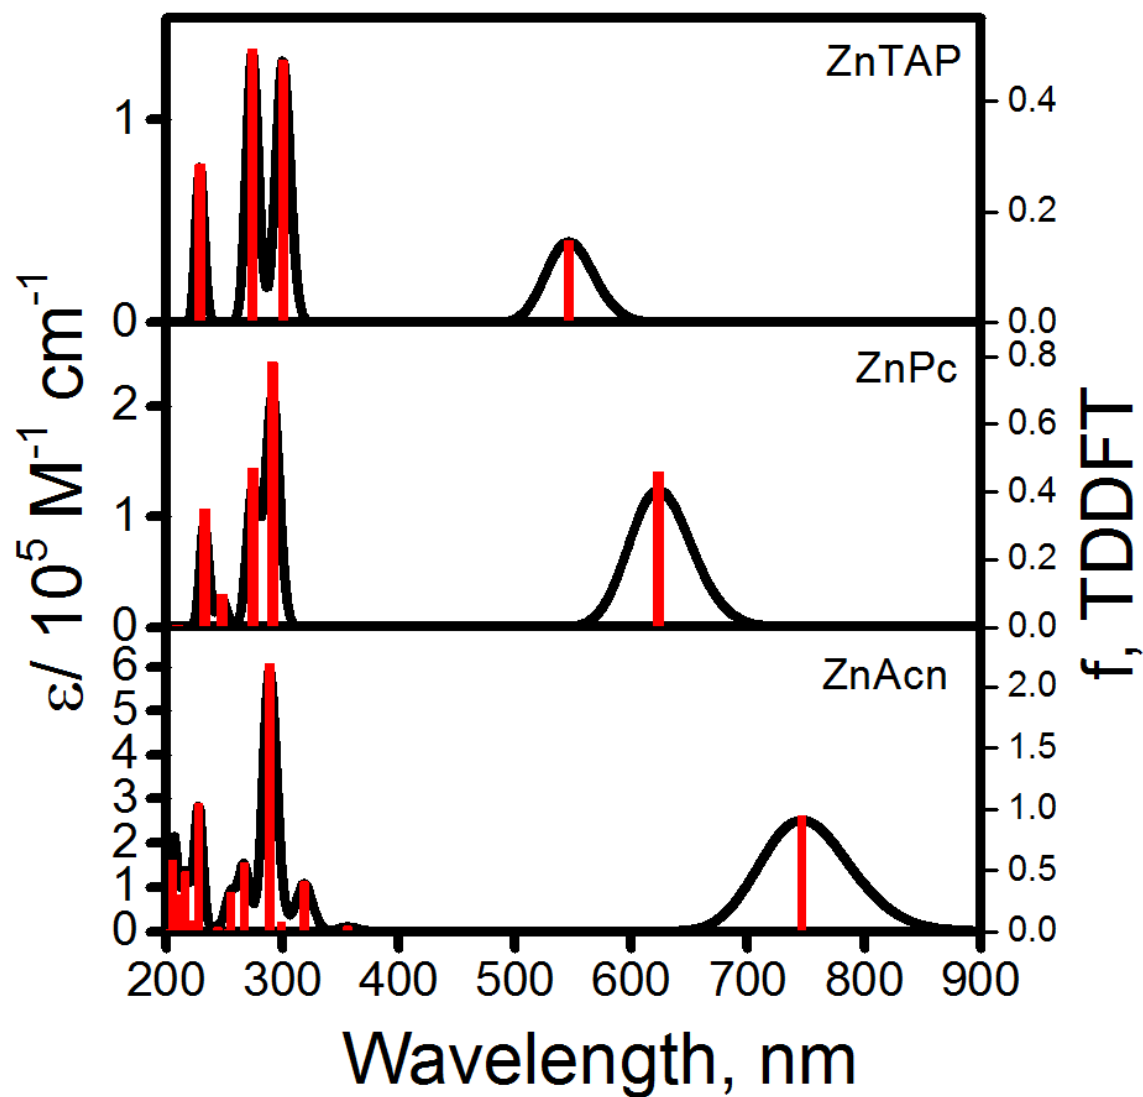

**Figure S19.** TDDFT-predicted UV-vis spectra of monomeric building blocks of ZnTAP, ZnPc, and ZnAcN.

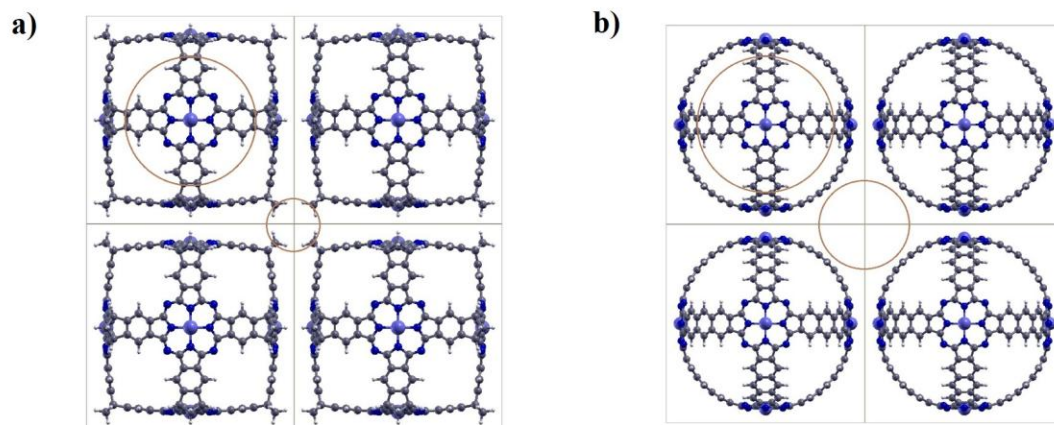

**Figure S20.** Periodic structures of molecular crystals: (a) 3 and (b) 4 cages used for adsorption calculations. The brown cycles show the adsorption spaces due to crystal formation.

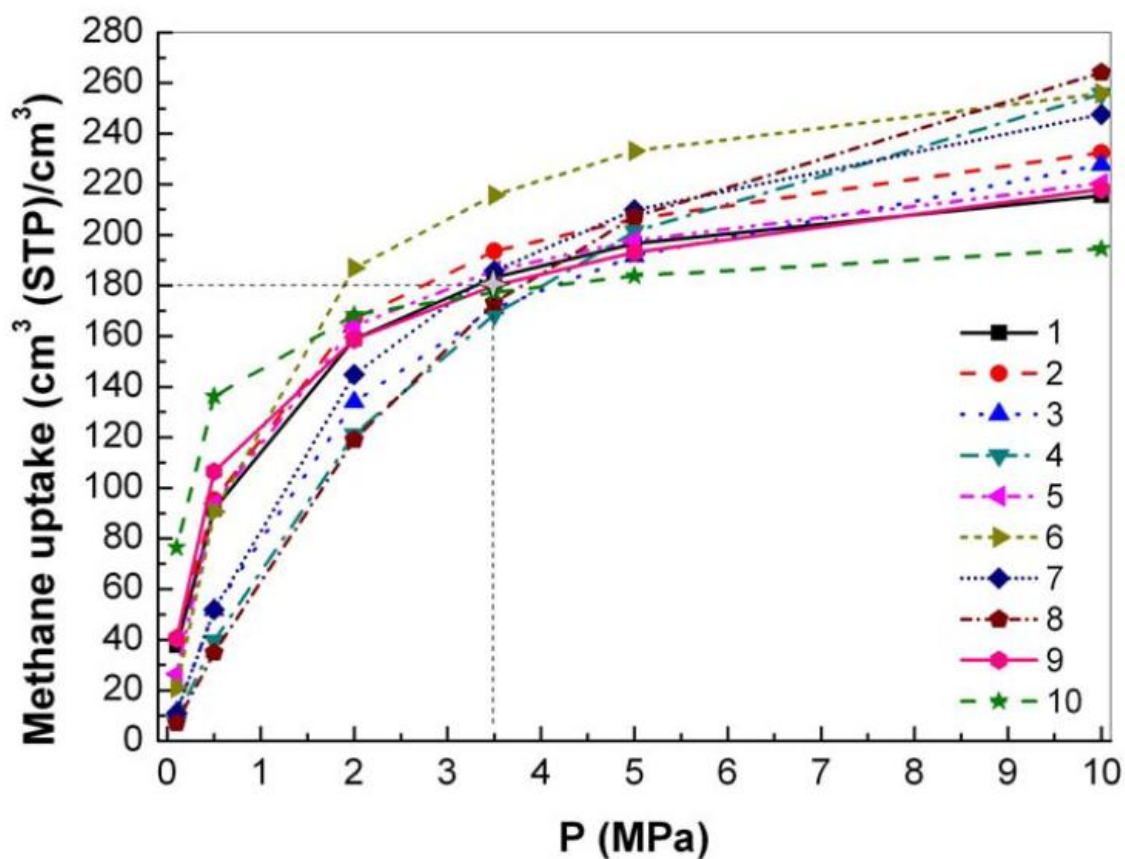

**Figure S21.** Methane adsorption isotherms for nanocages 1 - 10.

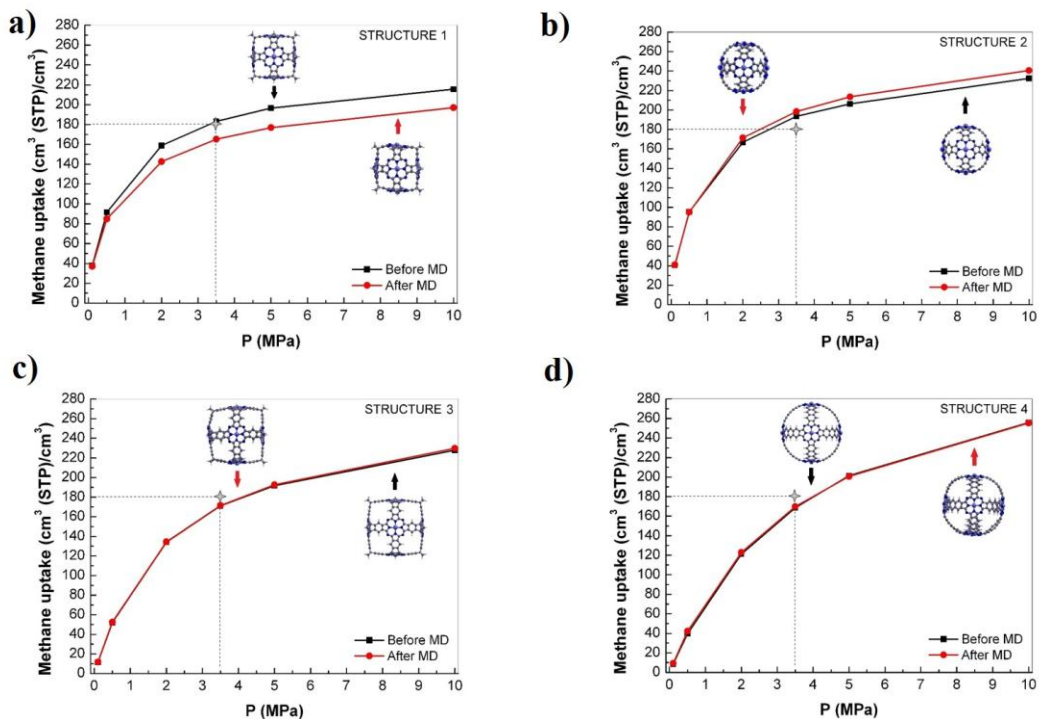

**Figure S22.** Adsorption isotherm of CH<sub>4</sub> in: (a) 1; (b) 2; (c) 3 and (d) 4 nanocages at T=298 K. Four-point star indicates the DOE target.

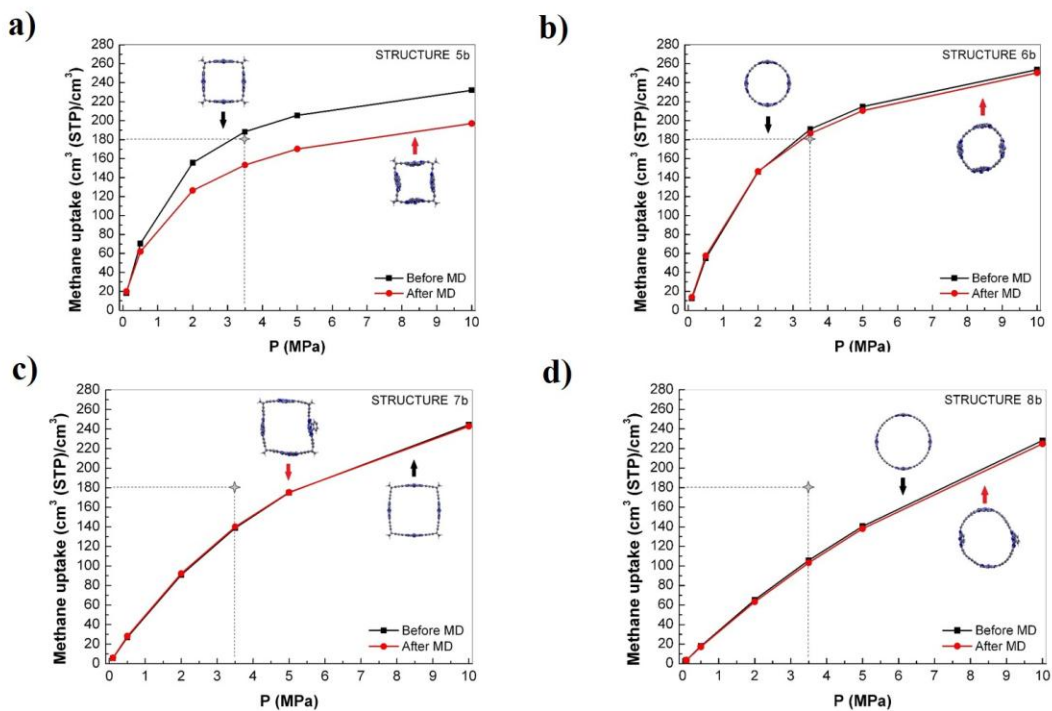

**Figure S23.** Adsorption isotherm of CH<sub>4</sub> for: (a) 5; (b) 6; (c) 7 and (d) 8 nanobarrels at T=298 K. Four-point star indicates the DOE target.

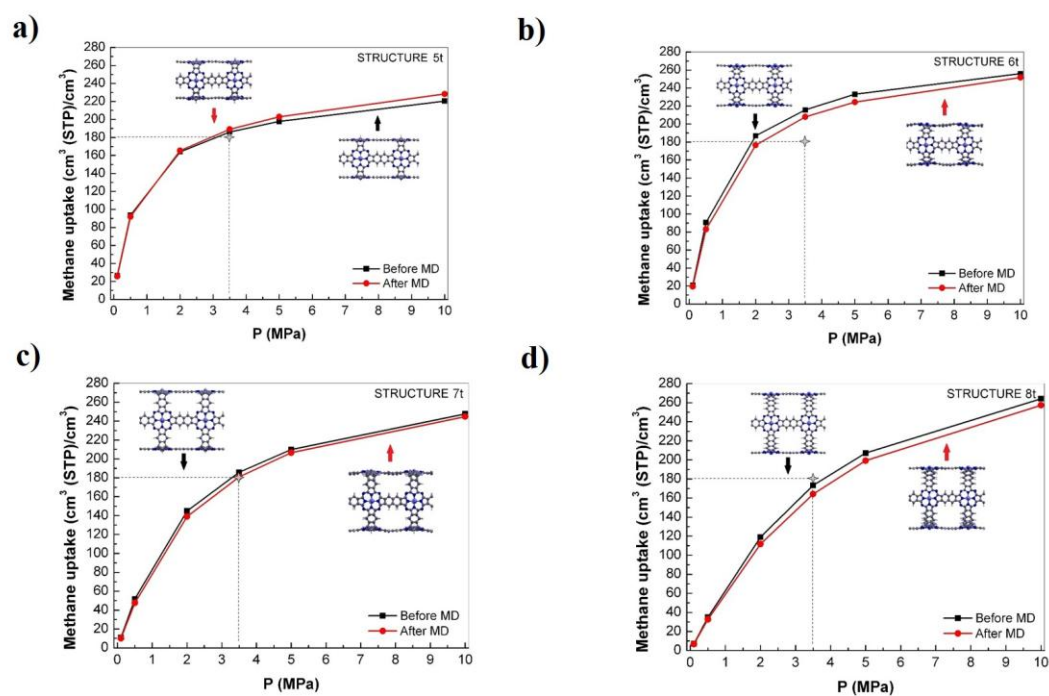

**Figure S24.** Adsorption isotherm of CH<sub>4</sub> for: (a) 5; (b) 6; (c) 7 and (d) 8 nanotubes at T=298 K. Four-point star indicates the DOE target.

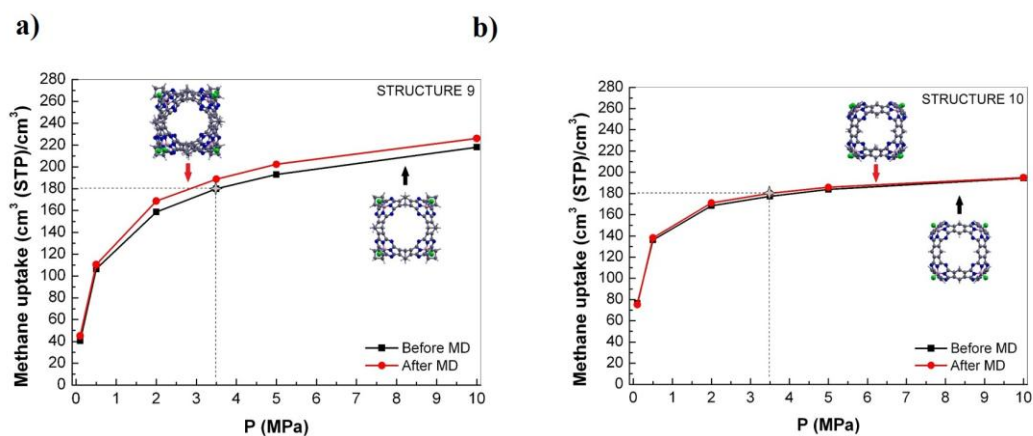

**Figure S25.** Adsorption isotherm of CH<sub>4</sub> for: (a) 9 and (b) 10 nanocages at T=298 K. Four-point star indicates the DOE target.

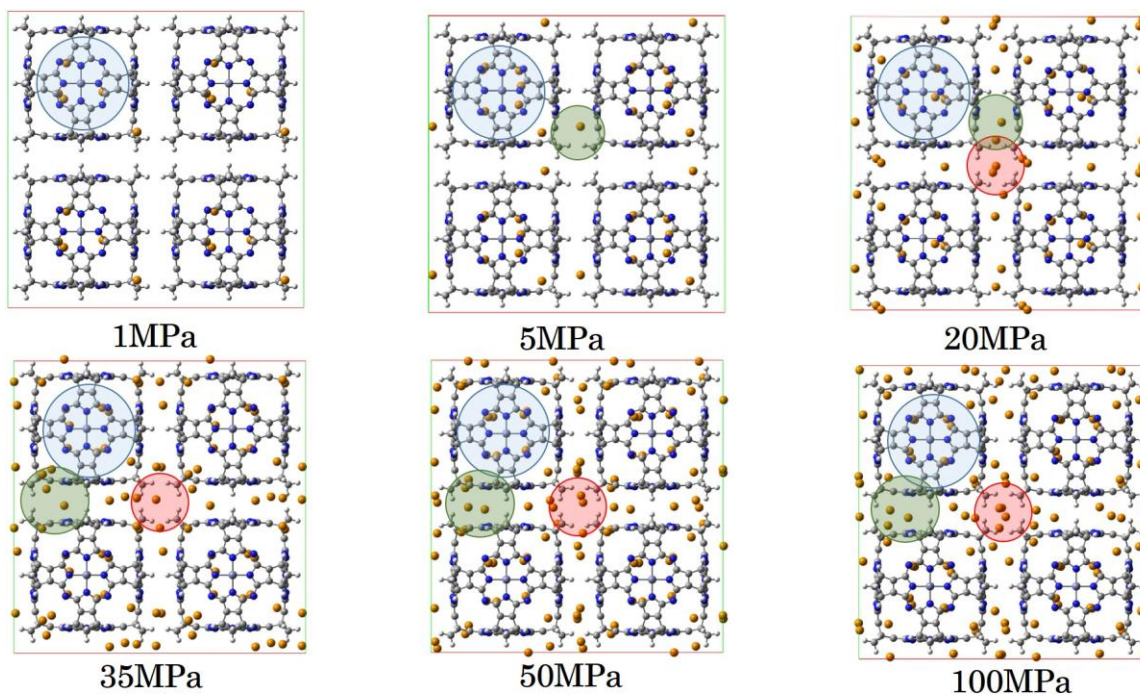

**Figure S26.** Distribution of the adsorbed methane in nanostructure **1** at different pressures. Blue, red and green cycles show the space in unit cell where the adsorption is occurred.

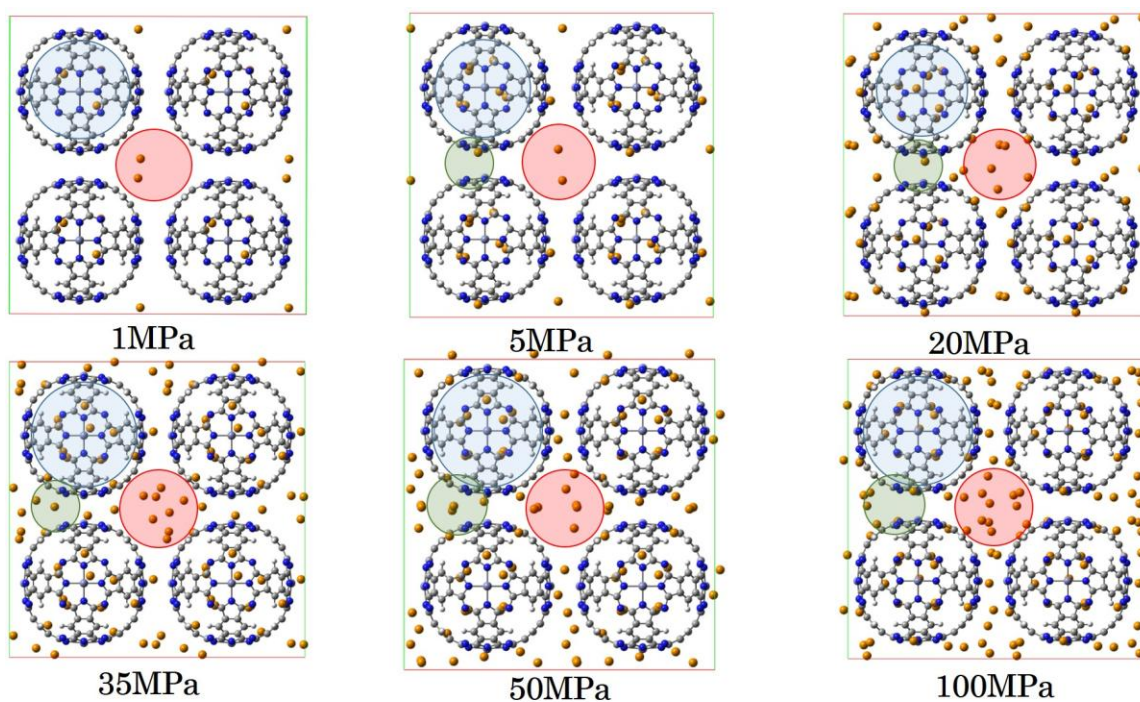

**Figure S27.** Distribution of the adsorbed methane in nanostructure **2** at different pressures. Blue, red and green cycles show the space in unit cell where the adsorption is occurred.

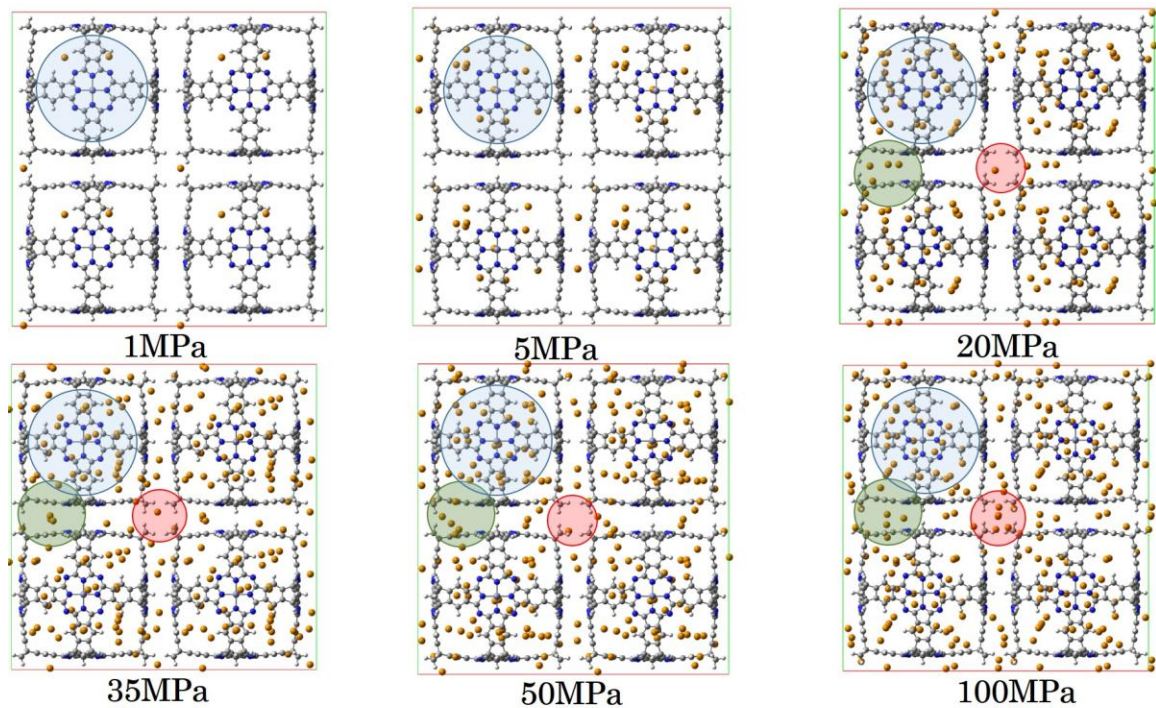

**Figure S28.** Distribution of the adsorbed methane in nanostructure **3** at different pressures. Blue, red and green cycles show the space in unit cell where the adsorption is occurred.

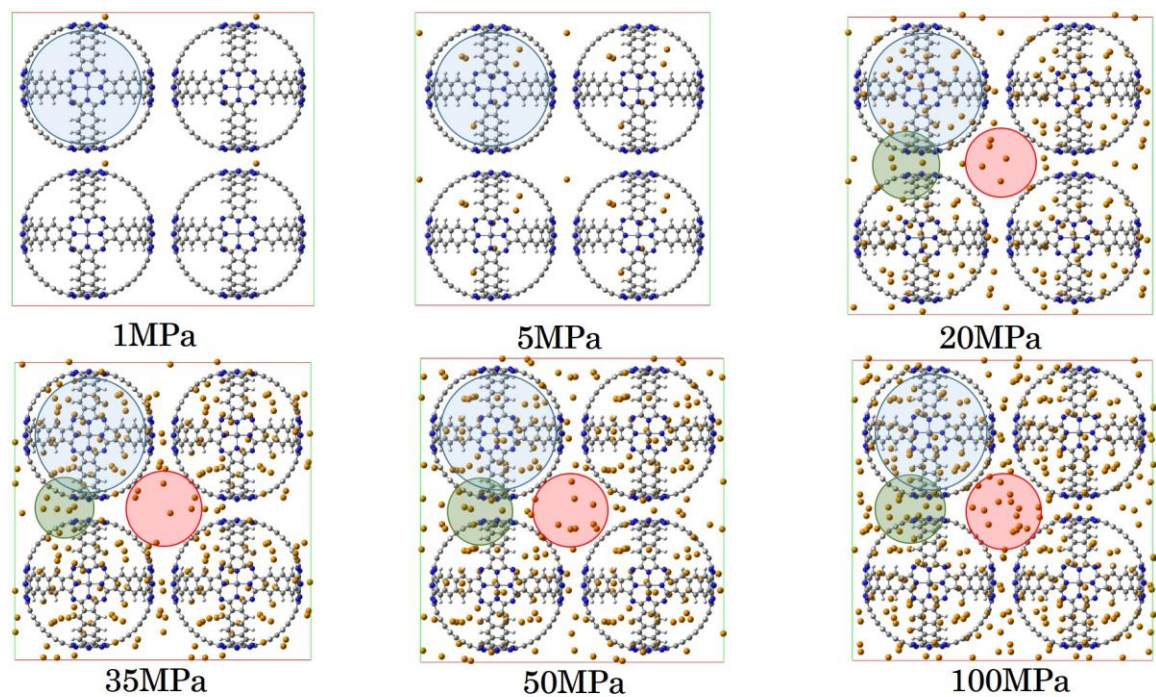

**Figure S29.** Distribution of the adsorbed methane in nanostructure **4** at different pressures. Blue, red and green cycles show the space in unit cell where the adsorption is occurred.

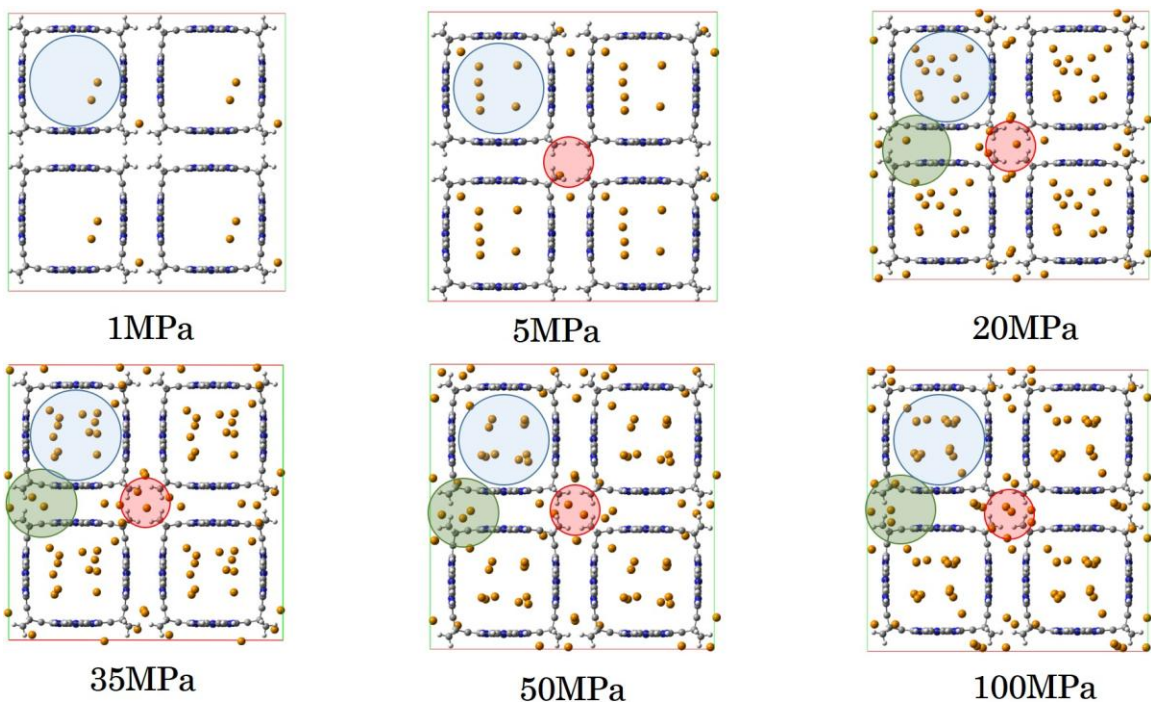

**Figure S30.** Distribution of the adsorbed methane in nanostructure **5** at different pressures. Blue, red and green cycles show the space in unit cell where the adsorption is occurred.

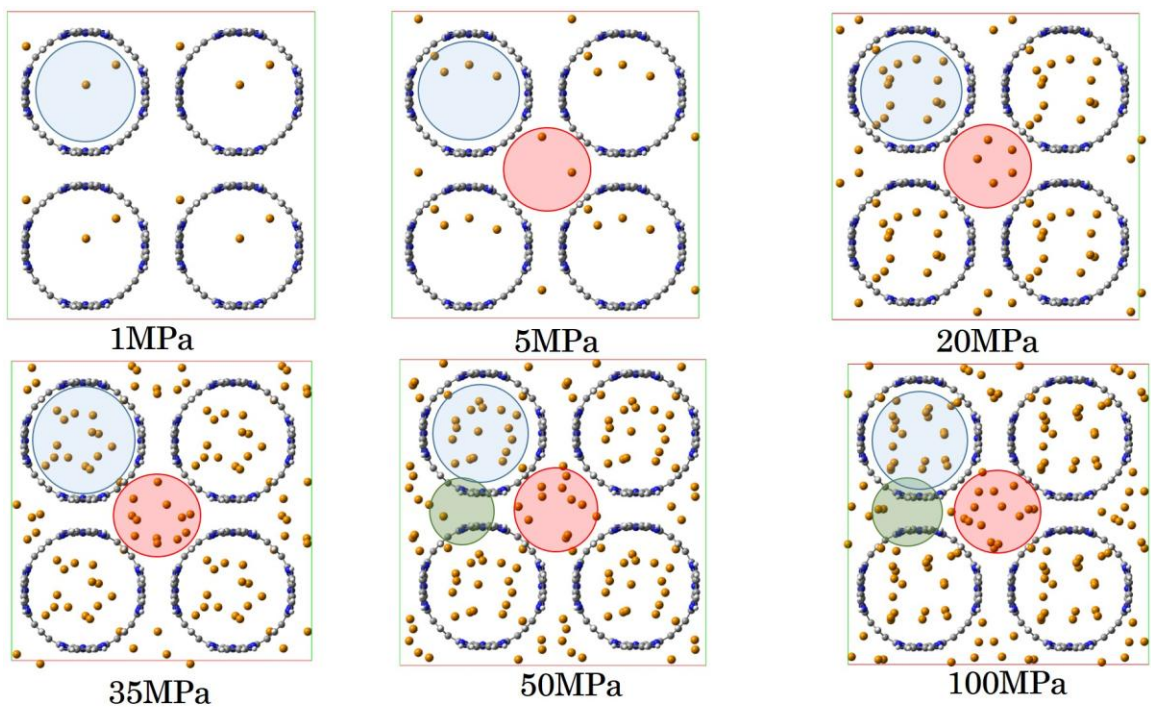

**Figure S31.** Distribution of the adsorbed methane in nanostructure **6** at different pressures. Blue, red and green cycles show the space in unit cell where the adsorption is occurred.

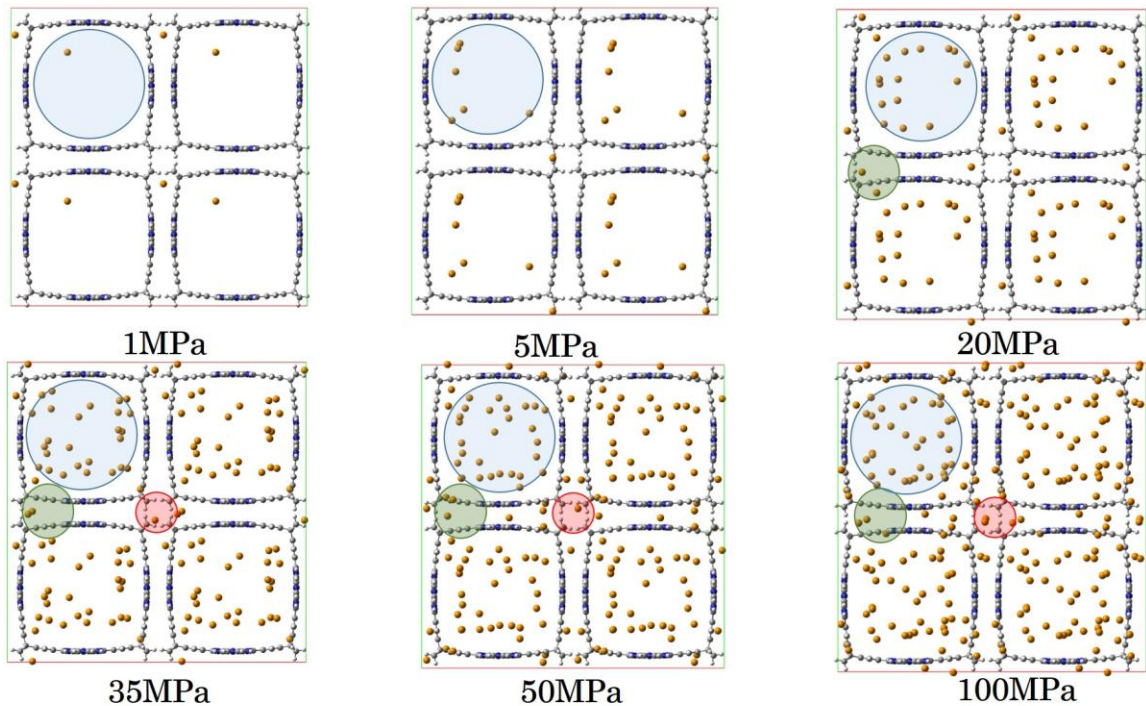

**Figure S32.** Distribution of the adsorbed methane in nanostructure **7** at different pressures. Blue, red and green cycles show the space in unit cell where the adsorption is occurred.



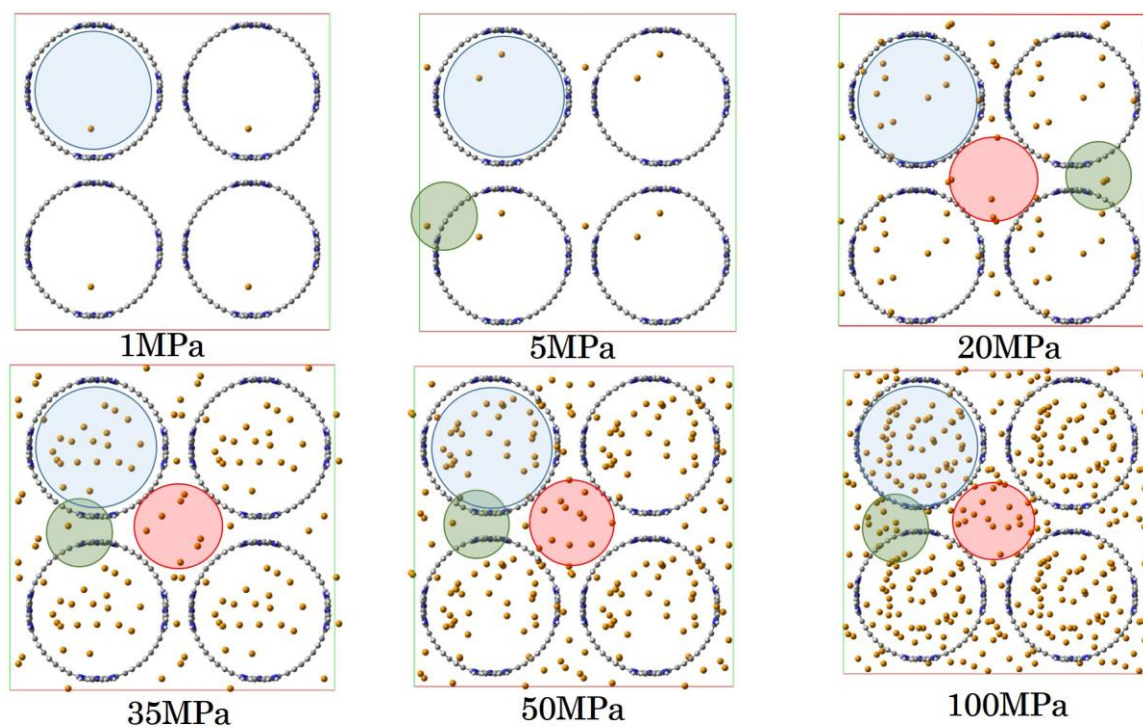

**Figure S33.** Distribution of the adsorbed methane in nanostructure **8** at different pressures. Blue, red and green cycles show the space in unit cell where the adsorption is occurred.

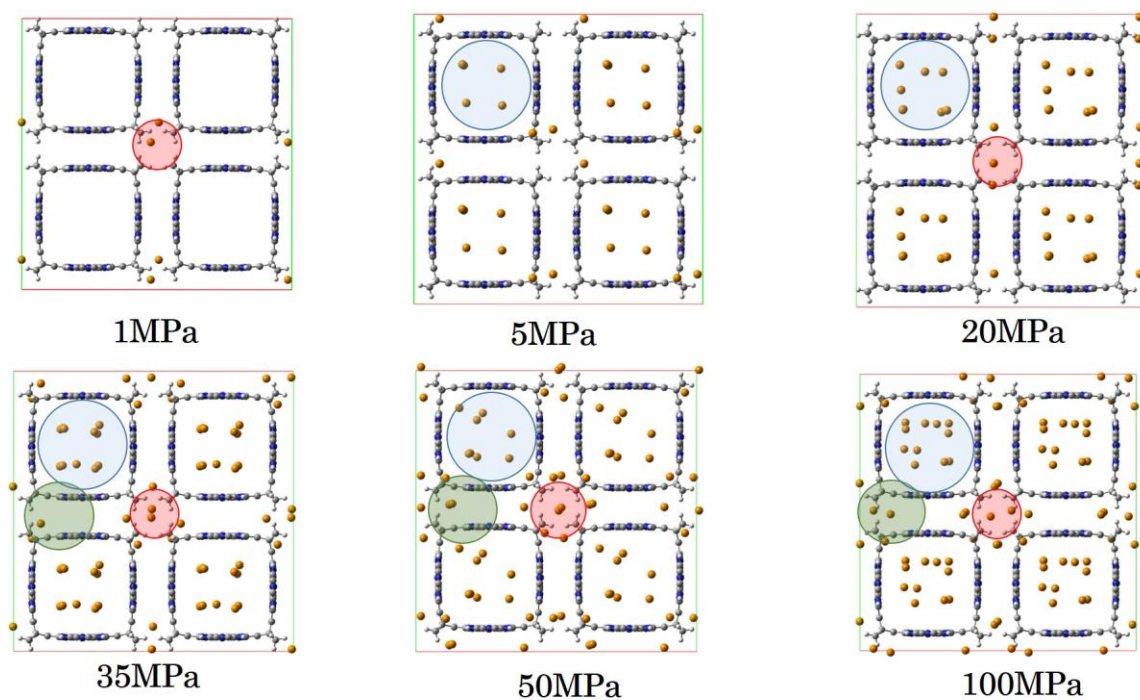

**Figure S34.** Distribution of the adsorbed methane in nanostructure **5t** in nanotube configuration at different pressures. Blue, red and green cycles show the space in unit cell where the adsorption is occurred.

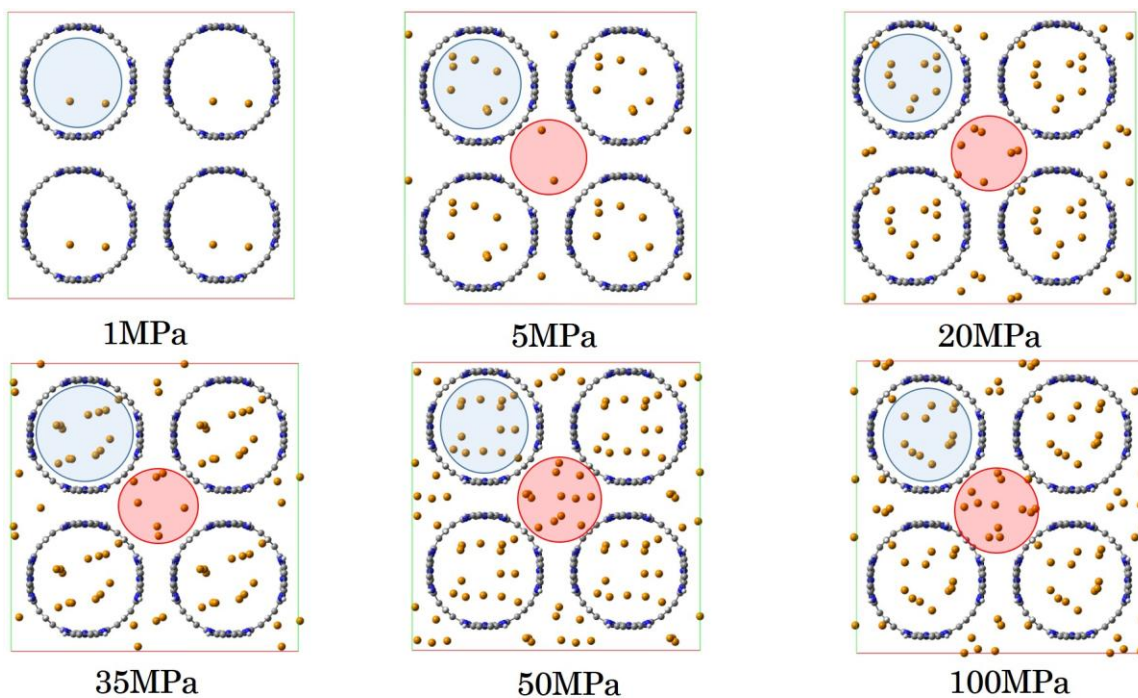

**Figure S35.** Distribution of the adsorbed methane in nanostructure **6t** in nanotube configuration at different pressures. Blue, red and green cycles show the space in unit cell where the adsorption is occurred.

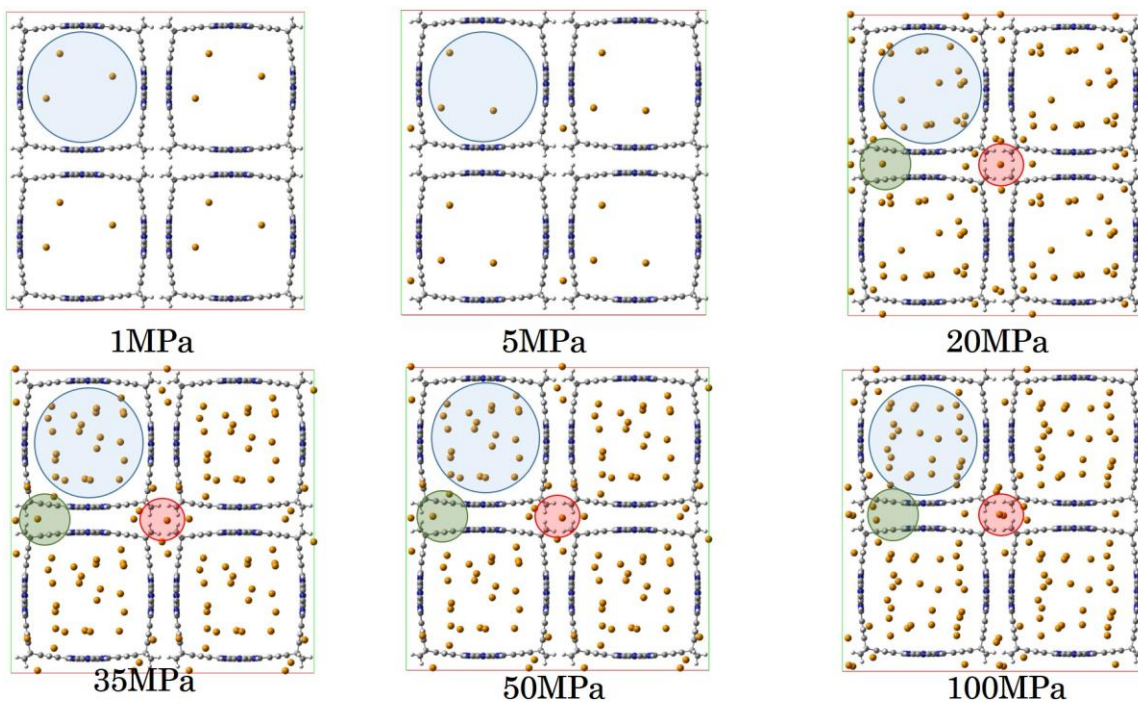

**Figure S36.** Distribution of the adsorbed methane in nanostructure **7t** in nanotube configuration at different pressures. Blue, red and green cycles show the space in unit cell where the adsorption is occurred.

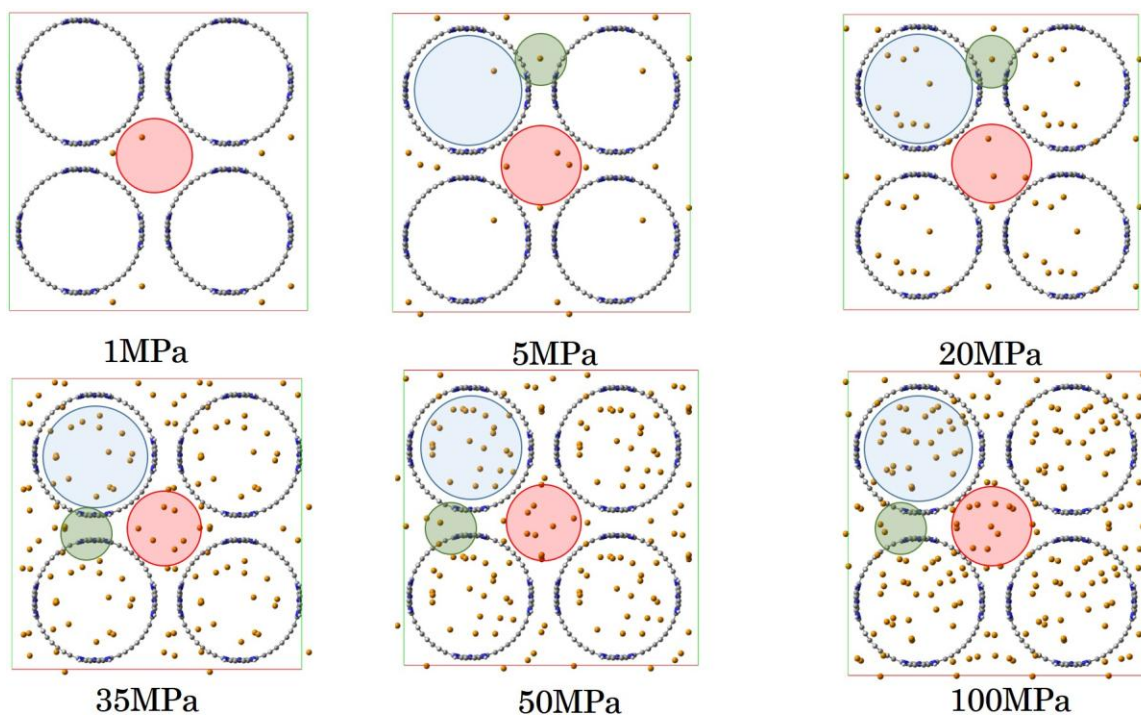

**Figure S37.** Distribution of the adsorbed methane in nanostructure **8t** in nanotube configuration at different pressures. Blue, red and green cycles show the space in unit cell where the adsorption is occurred.

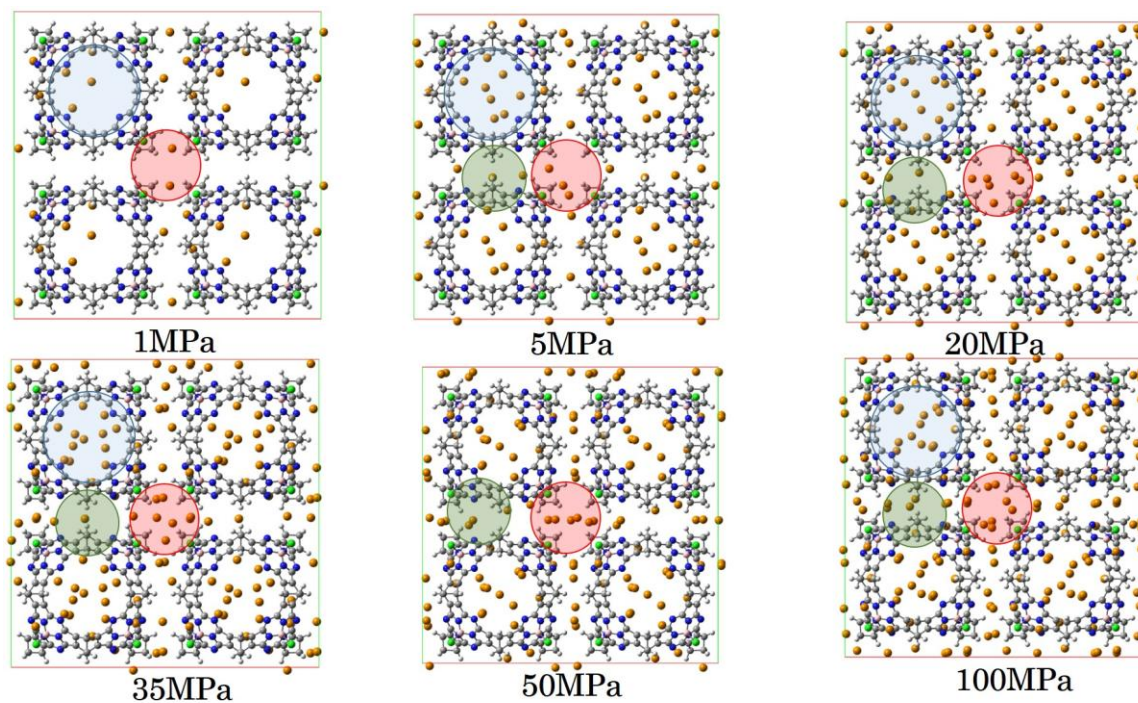

**Figure S38.** Distribution of the adsorbed methane in nanostructure **9** at different pressures. Blue, red and green cycles show the space in unit cell where the adsorption is occurred.

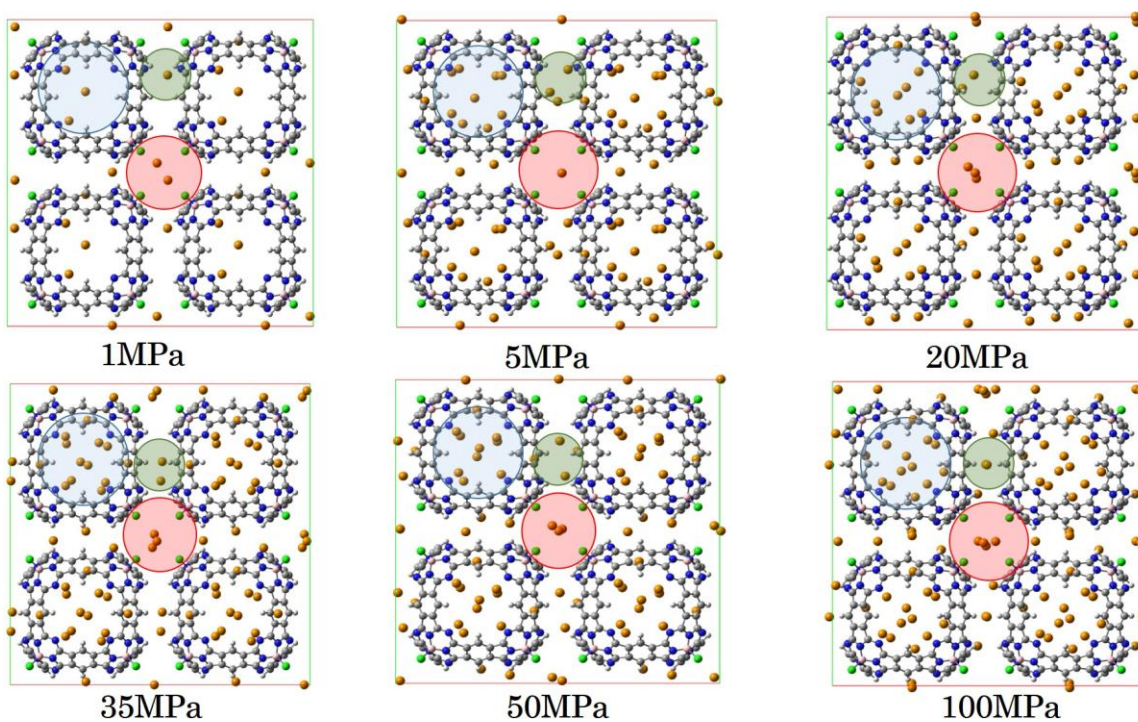

**Figure S39.** Distribution of the adsorbed methane in nanostructure **10** at different pressures. Blue, red and green cycles show the space in unit cell where the adsorption is occurred.

## SCHEME

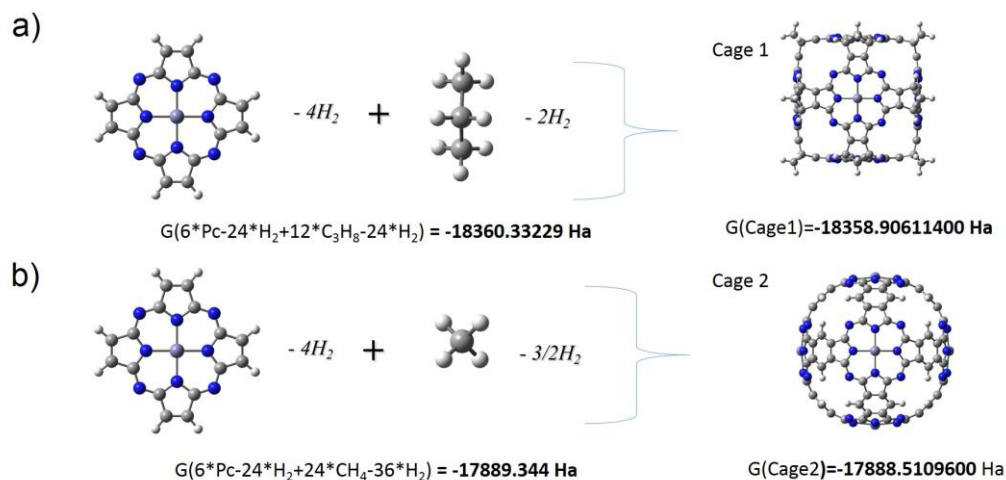

**Scheme S1.** Proposed reaction via monomers: (a) nanocage 1 and (b) nanocage 2.

## SCHEME

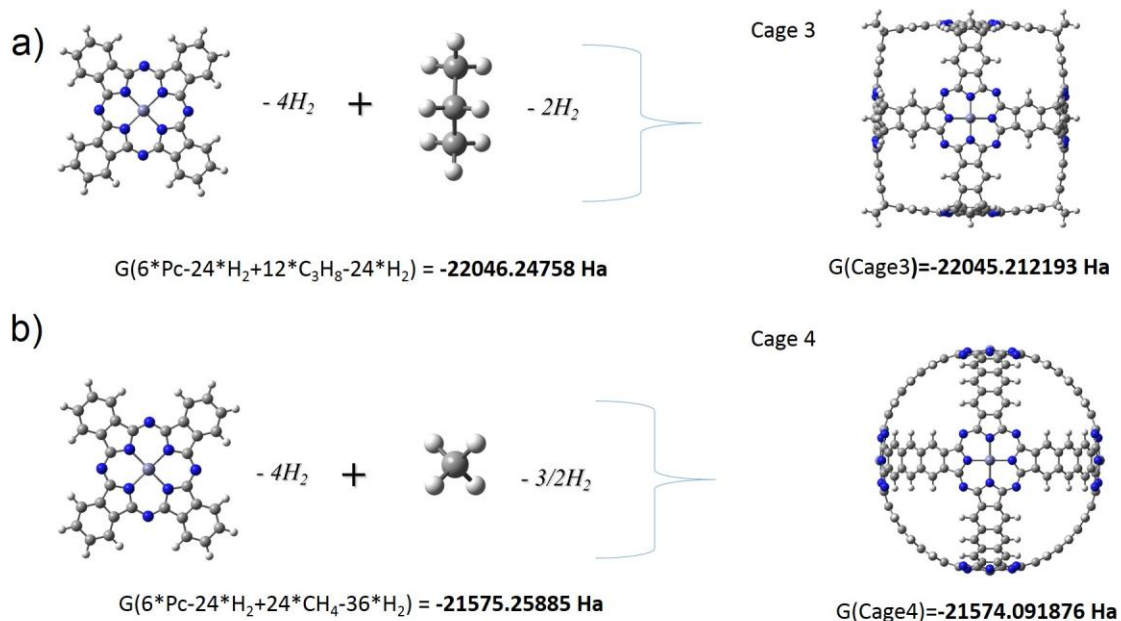

**Scheme S2.** Proposed reaction via monomers: (a) nanocage 3 and (b) nanocage 4.

## SCHEME

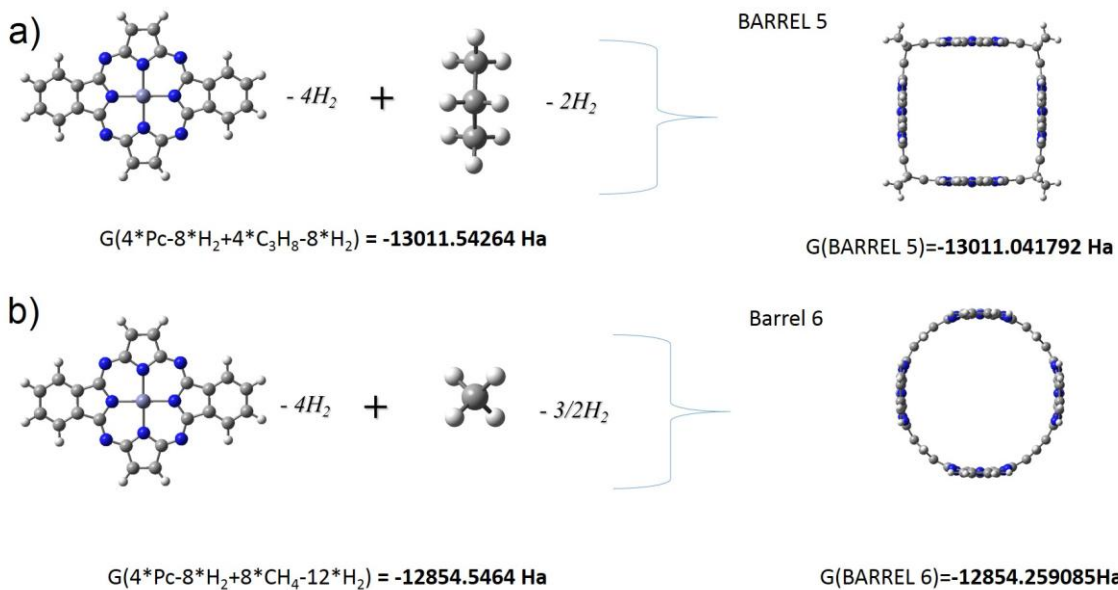

**Scheme S3.** Proposed reaction via monomers: (a) nanobarrel 5 and (b) nanobarrel 6.

## SCHEME

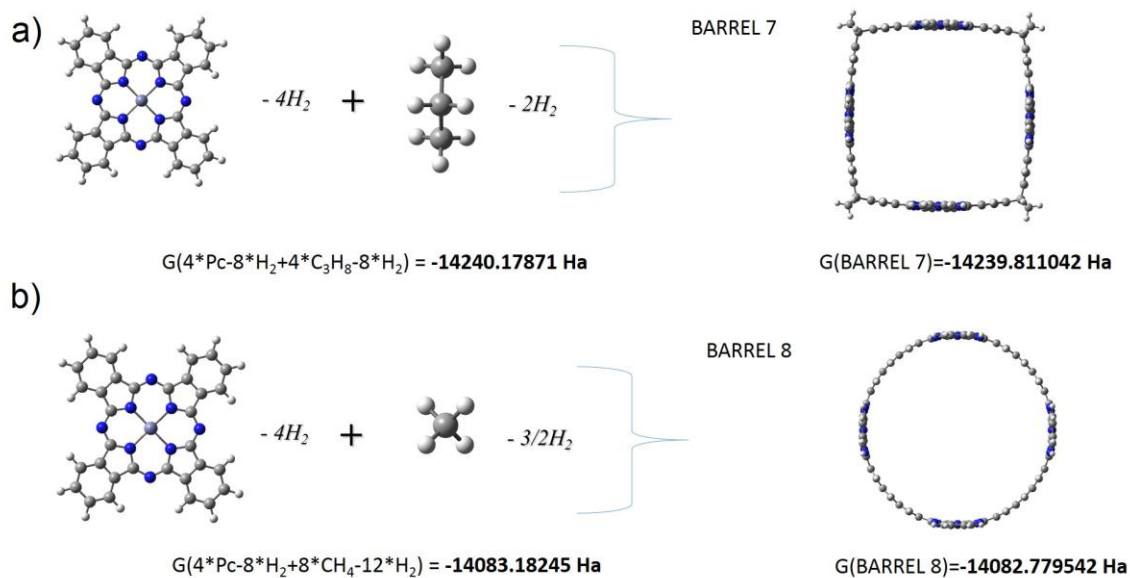

**Scheme S4.** Proposed reaction via monomers: (a) nanobarrel 7 and (b) nanobarrel 8.

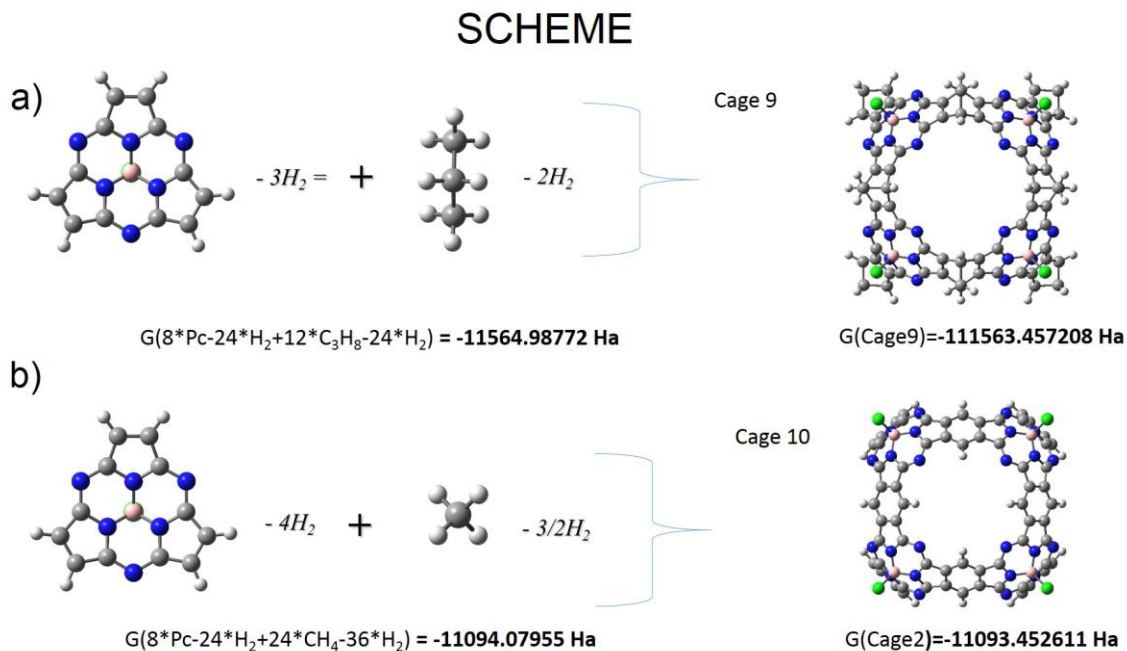

**Scheme S5.** Proposed reaction via monomers: (a) nanocage 9 and (b) nanocage 10.

**Supporting information Table 1:** TDDFT predicted energies and expansion coefficients for nanostructures 1 – 10

PcTube01\_LC-wPBE\_TDDFT

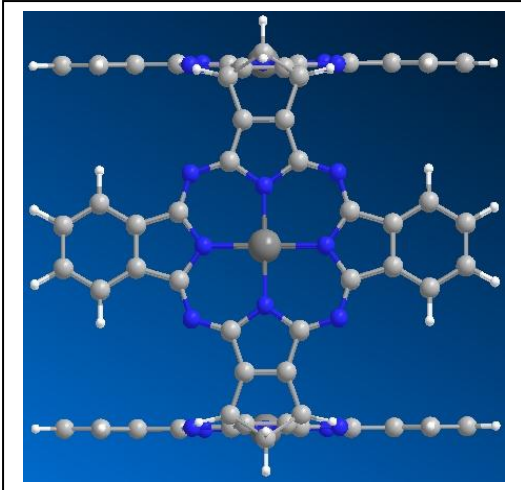

Excited State 1: Singlet-A2G 1.6652 eV 744.58 nm f=0.0000  $\langle S^2 \rangle = 0.000$

**Excited State 2: Singlet-EU 1.9053 eV 650.72 nm f=0.6537**  
 **$\langle S^2 \rangle = 0.000$**

|            |          |
|------------|----------|
| 517 -> 522 | -0.15215 |
| 517 -> 523 | -0.27784 |
| 518 -> 521 | -0.32492 |
| 518 -> 524 | -0.26277 |
| 519 -> 521 | 0.17793  |
| 519 -> 524 | -0.14390 |
| 520 -> 522 | 0.16832  |
| 520 -> 523 | -0.30738 |

**Excited State 3: Singlet-EU 1.9053 eV 650.72 nm f=0.6537**  
 **$\langle S^2 \rangle = 0.000$**

|            |          |
|------------|----------|
| 517 -> 522 | -0.27784 |
| 517 -> 523 | 0.15215  |
| 518 -> 521 | 0.17793  |
| 518 -> 524 | 0.14390  |
| 519 -> 521 | 0.32492  |
| 519 -> 524 | -0.26277 |
| 520 -> 522 | 0.30738  |
| 520 -> 523 | 0.16832  |

Excited State 4: Singlet-B2G 2.0241 eV 612.53 nm f=0.0000  $\langle S^2 \rangle = 0.000$

Excited State 5: Singlet-B2U 2.2860 eV 542.36 nm f=0.0000  $\langle S^2 \rangle = 0.000$

Excited State 6: Singlet-EG 2.3115 eV 536.38 nm f=0.0000  $\langle S^2 \rangle = 0.000$

Excited State 7: Singlet-EG 2.3115 eV 536.38 nm f=0.0000  $\langle S^2 \rangle = 0.000$

**Excited State 8: Singlet-A2U 2.3595 eV 525.47 nm f=0.8325**  
 **$\langle S^2 \rangle = 0.000$**

|            |          |
|------------|----------|
| 509 -> 524 | 0.10191  |
| 510 -> 522 | 0.10463  |
| 511 -> 523 | 0.10463  |
| 513 -> 521 | -0.17111 |
| 514 -> 522 | -0.12939 |



515 -> 523 -0.12939  
 516 -> 524 0.12836  
 517 -> 525 0.30692  
 518 -> 527 0.30774  
 519 -> 526 0.30774  
 520 -> 528 0.30921  
 Excited State 9: Singlet-EG 3.0984 eV 400.16 nm f=0.0000 <S\*\*2>=0.000  
 Excited State 10: Singlet-EG 3.0984 eV 400.16 nm f=0.0000 <S\*\*2>=0.000  
 Excited State 11: Singlet-B2U 3.0986 eV 400.13 nm f=0.0000 <S\*\*2>=0.000  
**Excited State 12: Singlet-A2U 3.0996 eV 400.00 nm f=0.0216**  
**<S\*\*2>=0.000**  
 505 -> 524 0.26726  
 506 -> 523 0.27256  
 507 -> 522 -0.27256  
 508 -> 521 0.31665  
 509 -> 524 0.17877  
 510 -> 522 0.18970  
 511 -> 523 0.18970  
 513 -> 521 -0.15080  
 Excited State 13: Singlet-A1U 3.2411 eV 382.54 nm f=0.0000 <S\*\*2>=0.000  
 Excited State 14: Singlet-EG 3.2792 eV 378.09 nm f=0.0000 <S\*\*2>=0.000  
 Excited State 15: Singlet-EG 3.2792 eV 378.09 nm f=0.0000 <S\*\*2>=0.000  
 Excited State 16: Singlet-B2U 3.3410 eV 371.10 nm f=0.0000 <S\*\*2>=0.000  
 Excited State 17: Singlet-A2G 3.4309 eV 361.38 nm f=0.0000 <S\*\*2>=0.000  
 Excited State 18: Singlet-EU 3.4366 eV 360.77 nm f=0.0002 <S\*\*2>=0.000  
 Excited State 19: Singlet-EU 3.4366 eV 360.77 nm f=0.0002 <S\*\*2>=0.000  
 Excited State 20: Singlet-B1U 3.4495 eV 359.43 nm f=0.0000 <S\*\*2>=0.000  
 Excited State 21: Singlet-?Sym 3.4547 eV 358.88 nm f=0.0000 <S\*\*2>=0.000  
 Excited State 22: Singlet-?Sym 3.4578 eV 358.57 nm f=0.0000 <S\*\*2>=0.000  
 Excited State 23: Singlet-B2G 3.4627 eV 358.05 nm f=0.0000 <S\*\*2>=0.000  
**Excited State 24: Singlet-EU 3.4660 eV 357.72 nm f=0.0220**  
**<S\*\*2>=0.000**  
 517 -> 522 0.33501  
 517 -> 523 -0.11580  
 518 -> 521 0.12836  
 518 -> 524 -0.12147  
 519 -> 521 0.37136  
 519 -> 524 0.35143  
 520 -> 522 0.24306  
**Excited State 25: Singlet-EU 3.4660 eV 357.72 nm f=0.0220**  
**<S\*\*2>=0.000**  
 517 -> 522 -0.11580  
 517 -> 523 -0.33501  
 518 -> 521 0.37136  
 518 -> 524 -0.35143  
 519 -> 521 -0.12836

519 -> 524 -0.12147  
 520 -> 523 0.24306  
 Excited State 26: Singlet-EG 3.5209 eV 352.13 nm f=0.0000 <S\*\*2>=0.000  
 Excited State 27: Singlet-EG 3.5209 eV 352.13 nm f=0.0000 <S\*\*2>=0.000  
**Excited State 28: Singlet-A2U 3.5685 eV 347.44 nm f=0.0442**  
**<S\*\*2>=0.000**  
 481 -> 521 0.19483  
 486 -> 523 0.14137  
 487 -> 522 0.14137  
 493 -> 524 0.10413  
 505 -> 524 -0.13883  
 506 -> 523 -0.16941  
 507 -> 522 0.16941  
 508 -> 521 -0.14838  
 509 -> 524 0.25346  
 510 -> 522 0.18748  
 511 -> 523 0.18748  
 512 -> 532 0.10248  
 514 -> 522 0.16204  
 515 -> 523 0.16204  
 516 -> 524 -0.25255  
 Excited State 29: Singlet-A2G 3.7684 eV 329.01 nm f=0.0000 <S\*\*2>=0.000  
**Excited State 30: Singlet-EU 3.7699 eV 328.88 nm f=0.0044**  
**<S\*\*2>=0.000**  
 489 -> 522 0.16271  
 489 -> 523 0.18985  
 490 -> 521 0.17389  
 490 -> 524 -0.15308  
 491 -> 521 0.20290  
 491 -> 524 0.17861  
 492 -> 522 -0.16303  
 492 -> 523 0.19022  
 505 -> 526 0.11739  
 505 -> 527 0.13697  
 506 -> 525 0.13371  
 506 -> 528 0.12515  
 507 -> 525 -0.11460  
 507 -> 528 0.10726  
 508 -> 526 -0.12009  
 508 -> 527 0.14012  
 511 -> 525 0.10131  
**Excited State 31: Singlet-EU 3.7699 eV 328.88 nm f=0.0044**  
**<S\*\*2>=0.000**  
 489 -> 522 -0.18985  
 489 -> 523 0.16271  
 490 -> 521 -0.20290

|                          |                   |                  |                  |                 |                           |
|--------------------------|-------------------|------------------|------------------|-----------------|---------------------------|
| 490 -> 524               | 0.17861           |                  |                  |                 |                           |
| 491 -> 521               | 0.17389           |                  |                  |                 |                           |
| 491 -> 524               | 0.15308           |                  |                  |                 |                           |
| 492 -> 522               | 0.19022           |                  |                  |                 |                           |
| 492 -> 523               | 0.16303           |                  |                  |                 |                           |
| 505 -> 526               | -0.13697          |                  |                  |                 |                           |
| 505 -> 527               | 0.11739           |                  |                  |                 |                           |
| 506 -> 525               | 0.11459           |                  |                  |                 |                           |
| 506 -> 528               | 0.10726           |                  |                  |                 |                           |
| 507 -> 525               | 0.13371           |                  |                  |                 |                           |
| 507 -> 528               | -0.12515          |                  |                  |                 |                           |
| 508 -> 526               | 0.14012           |                  |                  |                 |                           |
| 508 -> 527               | 0.12009           |                  |                  |                 |                           |
| 510 -> 525               | -0.10131          |                  |                  |                 |                           |
| Excited State 32:        | Singlet-B2G       | 3.7706 eV        | 328.82 nm        | f=0.0000        | <S**2>=0.000              |
| Excited State 33:        | Singlet-A2G       | 3.8134 eV        | 325.13 nm        | f=0.0000        | <S**2>=0.000              |
| <b>Excited State 34:</b> | <b>Singlet-EU</b> | <b>3.8168 eV</b> | <b>324.84 nm</b> | <b>f=0.0084</b> | <b>&lt;S**2&gt;=0.000</b> |
| 489 -> 522               | 0.20648           |                  |                  |                 |                           |
| 490 -> 521               | 0.22044           |                  |                  |                 |                           |
| 490 -> 524               | -0.19438          |                  |                  |                 |                           |
| 492 -> 522               | -0.20674          |                  |                  |                 |                           |
| 505 -> 526               | -0.19958          |                  |                  |                 |                           |
| 507 -> 525               | 0.19637           |                  |                  |                 |                           |
| 507 -> 528               | -0.18397          |                  |                  |                 |                           |
| 508 -> 526               | 0.20680           |                  |                  |                 |                           |
| 509 -> 526               | -0.13904          |                  |                  |                 |                           |
| 510 -> 525               | -0.14337          |                  |                  |                 |                           |
| 510 -> 528               | 0.13327           |                  |                  |                 |                           |
| 513 -> 526               | -0.10830          |                  |                  |                 |                           |
| <b>Excited State 35:</b> | <b>Singlet-EU</b> | <b>3.8168 eV</b> | <b>324.84 nm</b> | <b>f=0.0084</b> | <b>&lt;S**2&gt;=0.000</b> |
| 489 -> 523               | 0.20648           |                  |                  |                 |                           |
| 491 -> 521               | 0.22044           |                  |                  |                 |                           |
| 491 -> 524               | 0.19438           |                  |                  |                 |                           |
| 492 -> 523               | 0.20674           |                  |                  |                 |                           |
| 505 -> 527               | -0.19958          |                  |                  |                 |                           |
| 506 -> 525               | -0.19638          |                  |                  |                 |                           |
| 506 -> 528               | -0.18397          |                  |                  |                 |                           |
| 508 -> 527               | -0.20680          |                  |                  |                 |                           |
| 509 -> 527               | -0.13904          |                  |                  |                 |                           |
| 511 -> 525               | -0.14337          |                  |                  |                 |                           |
| 511 -> 528               | -0.13327          |                  |                  |                 |                           |
| 513 -> 527               | 0.10830           |                  |                  |                 |                           |
| Excited State 36:        | Singlet-B2G       | 3.8189 eV        | 324.66 nm        | f=0.0000        | <S**2>=0.000              |
| Excited State 37:        | Singlet-B2U       | 3.9046 eV        | 317.53 nm        | f=0.0000        | <S**2>=0.000              |

Excited State 38: Singlet-EG 3.9883 eV 310.87 nm f=0.0000 <S\*\*2>=0.000  
 Excited State 39: Singlet-EG 3.9883 eV 310.87 nm f=0.0000 <S\*\*2>=0.000  
 Excited State 40: Singlet-B2G 4.0913 eV 303.05 nm f=0.0000 <S\*\*2>=0.000  
**Excited State 41: Singlet-EU 4.1120 eV 301.52 nm f=0.0012**  
**<S\*\*2>=0.000**  
 517 -> 522 -0.36659  
 517 -> 523 0.13520  
 518 -> 524 -0.14900  
 519 -> 521 -0.24459  
 519 -> 524 0.40403  
 520 -> 522 0.28408  
 520 -> 523 0.10477  
**Excited State 42: Singlet-EU 4.1120 eV 301.52 nm f=0.0012**  
**<S\*\*2>=0.000**  
 517 -> 522 -0.13520  
 517 -> 523 -0.36659  
 518 -> 521 0.24459  
 518 -> 524 0.40403  
 519 -> 524 0.14900  
 520 -> 522 0.10477  
 520 -> 523 -0.28408  
 Excited State 43: Singlet-?Sym 4.1183 eV 301.06 nm f=0.0000 <S\*\*2>=0.000  
 Excited State 44: Singlet-A2G 4.1498 eV 298.77 nm f=0.0000 <S\*\*2>=0.000  
**Excited State 45: Singlet-A2U 4.1569 eV 298.26 nm f=4.6245**  
**<S\*\*2>=0.000**  
 510 -> 522 0.10568  
 511 -> 523 0.10568  
 513 -> 521 -0.27201  
 514 -> 522 -0.26215  
 515 -> 523 -0.26215  
 516 -> 524 0.27185  
 517 -> 525 -0.26488  
 518 -> 527 -0.16910  
 519 -> 526 -0.16910  
 Excited State 46: Singlet-B2U 4.1727 eV 297.13 nm f=0.0000 <S\*\*2>=0.000  
 Excited State 47: Singlet-EG 4.1751 eV 296.96 nm f=0.0000 <S\*\*2>=0.000  
 Excited State 48: Singlet-EG 4.1751 eV 296.96 nm f=0.0000 <S\*\*2>=0.000  
**Excited State 49: Singlet-A2U 4.1856 eV 296.21 nm f=0.1716**  
**<S\*\*2>=0.000**  
 517 -> 525 -0.43186  
 520 -> 528 0.50959  
 Excited State 50: Singlet-?Sym 4.1892 eV 295.96 nm f=0.0000 <S\*\*2>=0.000  
 Excited State 51: Singlet-?Sym 4.1911 eV 295.83 nm f=0.0000 <S\*\*2>=0.000  
 Excited State 52: Singlet-EG 4.1941 eV 295.62 nm f=0.0000 <S\*\*2>=0.000  
 Excited State 53: Singlet-EG 4.1941 eV 295.62 nm f=0.0000 <S\*\*2>=0.000  
 Excited State 54: Singlet-B1G 4.2345 eV 292.80 nm f=0.0000 <S\*\*2>=0.000

**Excited State 55: Singlet-EU 4.2389 eV 292.49 nm f=0.0035**  
**<S\*\*2>=0.000**

473 -> 522 -0.18640  
473 -> 523 -0.23833  
477 -> 521 0.20164  
477 -> 524 -0.17529  
478 -> 521 -0.25782  
478 -> 524 -0.22413  
480 -> 522 0.19029  
480 -> 523 -0.24330

**Excited State 56: Singlet-EU 4.2389 eV 292.49 nm f=0.0035**  
**<S\*\*2>=0.000**

473 -> 522 -0.23833  
473 -> 523 0.18640  
477 -> 521 0.25782  
477 -> 524 -0.22413  
478 -> 521 0.20164  
478 -> 524 0.17529  
480 -> 522 0.24330  
480 -> 523 0.19029

Excited State 57: Singlet-A1G 4.2439 eV 292.15 nm f=0.0000 <S\*\*2>=0.000

Excited State 58: Singlet-B1U 4.2674 eV 290.54 nm f=0.0000 <S\*\*2>=0.000

Excited State 59: Singlet-EG 4.2715 eV 290.26 nm f=0.0000 <S\*\*2>=0.000

Excited State 60: Singlet-EG 4.2715 eV 290.26 nm f=0.0000 <S\*\*2>=0.000

Excited State 61: Singlet-A1U 4.2754 eV 289.99 nm f=0.0000 <S\*\*2>=0.000

Excited State 62: Singlet-B2U 4.2929 eV 288.81 nm f=0.0000 <S\*\*2>=0.000

Excited State 63: Singlet-EG 4.2957 eV 288.63 nm f=0.0000 <S\*\*2>=0.000

Excited State 64: Singlet-EG 4.2957 eV 288.63 nm f=0.0000 <S\*\*2>=0.000

**Excited State 65: Singlet-A2U 4.2985 eV 288.44 nm f=0.0478**  
**<S\*\*2>=0.000**

489 -> 525 0.31653  
490 -> 526 -0.30807  
491 -> 527 0.30807  
492 -> 528 0.30037  
517 -> 525 0.11431  
520 -> 528 -0.14667

**Excited State 66: Singlet-EU 4.3070 eV 287.87 nm f=1.3079**  
**<S\*\*2>=0.000**

493 -> 526 0.17058  
494 -> 525 0.12369  
494 -> 528 -0.16983  
497 -> 526 -0.20615  
498 -> 525 0.14825  
513 -> 526 0.17780  
514 -> 525 -0.26103  
514 -> 528 0.21181

|                           |          |                   |                  |                  |                       |
|---------------------------|----------|-------------------|------------------|------------------|-----------------------|
| 516 -> 526                | 0.28661  |                   |                  |                  |                       |
| 517 -> 522                | 0.10951  |                   |                  |                  |                       |
| 519 -> 524                | 0.11225  |                   |                  |                  |                       |
| <b>Excited State 67:</b>  |          | <b>Singlet-EU</b> | <b>4.3070 eV</b> | <b>287.87 nm</b> | <b>f=1.3079</b>       |
| <b>&lt;S**2&gt;=0.000</b> |          |                   |                  |                  |                       |
| 493 -> 527                | 0.17058  |                   |                  |                  |                       |
| 495 -> 525                | 0.12369  |                   |                  |                  |                       |
| 495 -> 528                | 0.16983  |                   |                  |                  |                       |
| 497 -> 527                | 0.20615  |                   |                  |                  |                       |
| 499 -> 525                | -0.14825 |                   |                  |                  |                       |
| 513 -> 527                | -0.17780 |                   |                  |                  |                       |
| 515 -> 525                | -0.26103 |                   |                  |                  |                       |
| 515 -> 528                | -0.21181 |                   |                  |                  |                       |
| 516 -> 527                | 0.28660  |                   |                  |                  |                       |
| 517 -> 523                | 0.10951  |                   |                  |                  |                       |
| 518 -> 524                | 0.11225  |                   |                  |                  |                       |
| Excited State 68:         |          | Singlet-B2G       | 4.4184 eV        | 280.61 nm        | f=0.0000 <S**2>=0.000 |
| Excited State 69:         |          | Singlet-B1G       | 4.4632 eV        | 277.79 nm        | f=0.0000 <S**2>=0.000 |
| Excited State 70:         |          | Singlet-A1U       | 4.4940 eV        | 275.89 nm        | f=0.0000 <S**2>=0.000 |
| Excited State 71:         |          | Singlet-EG        | 4.4943 eV        | 275.87 nm        | f=0.0000 <S**2>=0.000 |
| Excited State 72:         |          | Singlet-EG        | 4.4943 eV        | 275.87 nm        | f=0.0000 <S**2>=0.000 |
| Excited State 73:         |          | Singlet-B1U       | 4.4944 eV        | 275.86 nm        | f=0.0000 <S**2>=0.000 |
| <b>Excited State 74:</b>  |          | <b>Singlet-EU</b> | <b>4.5007 eV</b> | <b>275.48 nm</b> | <b>f=0.0004</b>       |
| <b>&lt;S**2&gt;=0.000</b> |          |                   |                  |                  |                       |
| 498 -> 528                | 0.12141  |                   |                  |                  |                       |
| 499 -> 528                | 0.10687  |                   |                  |                  |                       |
| 500 -> 526                | -0.10062 |                   |                  |                  |                       |
| 500 -> 527                | 0.11432  |                   |                  |                  |                       |
| 501 -> 522                | -0.10894 |                   |                  |                  |                       |
| 501 -> 523                | -0.12377 |                   |                  |                  |                       |
| 502 -> 521                | -0.13905 |                   |                  |                  |                       |
| 502 -> 524                | -0.11893 |                   |                  |                  |                       |
| 503 -> 521                | -0.12239 |                   |                  |                  |                       |
| 503 -> 524                | 0.10468  |                   |                  |                  |                       |
| 504 -> 522                | 0.11659  |                   |                  |                  |                       |
| 504 -> 523                | -0.13246 |                   |                  |                  |                       |
| 512 -> 527                | 0.11259  |                   |                  |                  |                       |
| 517 -> 530                | -0.12682 |                   |                  |                  |                       |
| 517 -> 531                | 0.14408  |                   |                  |                  |                       |
| 518 -> 529                | -0.16647 |                   |                  |                  |                       |
| 518 -> 532                | 0.13854  |                   |                  |                  |                       |
| 519 -> 529                | 0.14653  |                   |                  |                  |                       |
| 519 -> 532                | 0.12194  |                   |                  |                  |                       |
| 520 -> 530                | 0.13942  |                   |                  |                  |                       |
| 520 -> 531                | 0.15839  |                   |                  |                  |                       |

**Excited State 75: Singlet-EU 4.5007 eV 275.48 nm f=0.0004**  
**<S\*\*2>=0.000**

498 -> 528 -0.10687  
499 -> 528 0.12141  
500 -> 526 -0.11432  
500 -> 527 -0.10062  
501 -> 522 -0.12377  
501 -> 523 0.10894  
502 -> 521 0.12239  
502 -> 524 0.10468  
503 -> 521 -0.13905  
503 -> 524 0.11893  
504 -> 522 0.13245  
504 -> 523 0.11659  
512 -> 526 0.11259  
517 -> 530 -0.14408  
517 -> 531 -0.12682  
518 -> 529 0.14653  
518 -> 532 -0.12194  
519 -> 529 0.16647  
519 -> 532 0.13854  
520 -> 530 0.15839  
520 -> 531 -0.13942

Excited State 76: Singlet-A1G 4.5215 eV 274.21 nm f=0.0000 <S\*\*2>=0.000

Excited State 77: Singlet-A2G 4.6248 eV 268.09 nm f=0.0000 <S\*\*2>=0.000

**Excited State 78: Singlet-EU 4.6715 eV 265.41 nm f=0.8087**  
**<S\*\*2>=0.000**

493 -> 526 -0.10323  
494 -> 525 -0.11422  
497 -> 526 0.16967  
498 -> 525 -0.11399  
505 -> 526 -0.16289  
507 -> 525 0.18185  
507 -> 528 -0.18133  
508 -> 526 0.16616  
509 -> 526 0.23203  
510 -> 525 0.14351  
510 -> 528 -0.22715  
512 -> 527 -0.10750  
513 -> 526 0.19595  
514 -> 525 -0.16554

**Excited State 79: Singlet-EU 4.6715 eV 265.41 nm f=0.8087**  
**<S\*\*2>=0.000**

493 -> 527 -0.10323  
495 -> 525 -0.11422  
497 -> 527 -0.16967

|                          |                   |                  |                  |                 |                           |
|--------------------------|-------------------|------------------|------------------|-----------------|---------------------------|
| 499 -> 525               | 0.11399           |                  |                  |                 |                           |
| 505 -> 527               | -0.16289          |                  |                  |                 |                           |
| 506 -> 525               | -0.18185          |                  |                  |                 |                           |
| 506 -> 528               | -0.18133          |                  |                  |                 |                           |
| 508 -> 527               | -0.16616          |                  |                  |                 |                           |
| 509 -> 527               | 0.23203           |                  |                  |                 |                           |
| 511 -> 525               | 0.14351           |                  |                  |                 |                           |
| 511 -> 528               | 0.22715           |                  |                  |                 |                           |
| 512 -> 526               | -0.10750          |                  |                  |                 |                           |
| 513 -> 527               | -0.19595          |                  |                  |                 |                           |
| 515 -> 525               | -0.16553          |                  |                  |                 |                           |
| Excited State 80:        | Singlet-A2U       | 4.6940 eV        | 264.13 nm        | f=0.0000        | <S**2>=0.000              |
| Excited State 81:        | Singlet-EG        | 4.7047 eV        | 263.53 nm        | f=0.0000        | <S**2>=0.000              |
| Excited State 82:        | Singlet-EG        | 4.7047 eV        | 263.53 nm        | f=0.0000        | <S**2>=0.000              |
| Excited State 83:        | Singlet-B2U       | 4.7154 eV        | 262.93 nm        | f=0.0000        | <S**2>=0.000              |
| Excited State 84:        | Singlet-B2G       | 4.7265 eV        | 262.31 nm        | f=0.0000        | <S**2>=0.000              |
| Excited State 85:        | Singlet-B1G       | 4.7523 eV        | 260.89 nm        | f=0.0000        | <S**2>=0.000              |
| Excited State 86:        | Singlet-B1U       | 4.7573 eV        | 260.62 nm        | f=0.0000        | <S**2>=0.000              |
| Excited State 87:        | Singlet-EG        | 4.7736 eV        | 259.73 nm        | f=0.0000        | <S**2>=0.000              |
| Excited State 88:        | Singlet-EG        | 4.7736 eV        | 259.73 nm        | f=0.0000        | <S**2>=0.000              |
| Excited State 89:        | Singlet-A1U       | 4.7923 eV        | 258.72 nm        | f=0.0000        | <S**2>=0.000              |
| <b>Excited State 90:</b> | <b>Singlet-EU</b> | <b>4.7964 eV</b> | <b>258.50 nm</b> | <b>f=0.0024</b> | <b>&lt;S**2&gt;=0.000</b> |
| 474 -> 526               | -0.14096          |                  |                  |                 |                           |
| 474 -> 527               | 0.14109           |                  |                  |                 |                           |
| 475 -> 525               | 0.15732           |                  |                  |                 |                           |
| 475 -> 528               | -0.14095          |                  |                  |                 |                           |
| 476 -> 525               | 0.15747           |                  |                  |                 |                           |
| 476 -> 528               | 0.14109           |                  |                  |                 |                           |
| 479 -> 526               | 0.16602           |                  |                  |                 |                           |
| 479 -> 527               | 0.16617           |                  |                  |                 |                           |
| 486 -> 528               | 0.10162           |                  |                  |                 |                           |
| 487 -> 528               | -0.10172          |                  |                  |                 |                           |
| 488 -> 526               | -0.11760          |                  |                  |                 |                           |
| 488 -> 527               | 0.11772           |                  |                  |                 |                           |
| 510 -> 525               | 0.11005           |                  |                  |                 |                           |
| 511 -> 525               | 0.10994           |                  |                  |                 |                           |
| 512 -> 526               | 0.14523           |                  |                  |                 |                           |
| 512 -> 527               | 0.14538           |                  |                  |                 |                           |
| <b>Excited State 91:</b> | <b>Singlet-EU</b> | <b>4.7964 eV</b> | <b>258.50 nm</b> | <b>f=0.0024</b> | <b>&lt;S**2&gt;=0.000</b> |
| 474 -> 526               | 0.14110           |                  |                  |                 |                           |
| 474 -> 527               | 0.14096           |                  |                  |                 |                           |
| 475 -> 525               | -0.15747          |                  |                  |                 |                           |
| 475 -> 528               | 0.14109           |                  |                  |                 |                           |
| 476 -> 525               | 0.15732           |                  |                  |                 |                           |



476 -> 528 0.14096  
 479 -> 526 -0.16618  
 479 -> 527 0.16601  
 486 -> 528 -0.10172  
 487 -> 528 -0.10162  
 488 -> 526 0.11772  
 488 -> 527 0.11760  
 510 -> 525 0.10994  
 511 -> 525 -0.11005  
 512 -> 526 -0.14537  
 512 -> 527 0.14523  
 Excited State 92: Singlet-A1G 4.8005 eV 258.28 nm f=0.0000 <S\*\*2>=0.000  
 Excited State 93: Singlet-B1G 4.8052 eV 258.02 nm f=0.0000 <S\*\*2>=0.000  
 Excited State 94: Singlet-EG 4.8075 eV 257.90 nm f=0.0000 <S\*\*2>=0.000  
 Excited State 95: Singlet-EG 4.8075 eV 257.90 nm f=0.0000 <S\*\*2>=0.000  
 Excited State 96: Singlet-B1U 4.8081 eV 257.87 nm f=0.0000 <S\*\*2>=0.000  
 Excited State 97: Singlet-A1U 4.8141 eV 257.54 nm f=0.0000 <S\*\*2>=0.000  
 Excited State 98: Singlet-B2U 4.8166 eV 257.41 nm f=0.0000 <S\*\*2>=0.000  
 Excited State 99: Singlet-EG 4.8194 eV 257.26 nm f=0.0000 <S\*\*2>=0.000  
 Excited State 100: Singlet-EG 4.8194 eV 257.26 nm f=0.0000 <S\*\*2>=0.000  
 Excited State 101: Singlet-EU 4.8233 eV 257.05 nm f=0.0002 <S\*\*2>=0.000  
 Excited State 102: Singlet-EU 4.8233 eV 257.05 nm f=0.0002 <S\*\*2>=0.000  
**Excited State 103: Singlet-A2U 4.8237 eV 257.03 nm f=0.4155**  
**<S\*\*2>=0.000**  
 481 -> 521 -0.12757  
 493 -> 524 0.22793  
 494 -> 522 0.20967  
 495 -> 523 0.20967  
 497 -> 521 0.31746  
 498 -> 522 0.18765  
 499 -> 523 -0.18765  
 508 -> 521 0.12799  
 516 -> 524 -0.17237  
 Excited State 104: Singlet-B1G 4.8602 eV 255.10 nm f=0.0000 <S\*\*2>=0.000  
 Excited State 105: Singlet-A1G 4.8607 eV 255.08 nm f=0.0000 <S\*\*2>=0.000  
 Excited State 106: Singlet-EU 4.8868 eV 253.71 nm f=0.0215 <S\*\*2>=0.000  
 Excited State 107: Singlet-EU 4.8868 eV 253.71 nm f=0.0215 <S\*\*2>=0.000  
 Excited State 108: Singlet-A2G 4.8983 eV 253.12 nm f=0.0000 <S\*\*2>=0.000  
**Excited State 109: Singlet-A2U 4.9266 eV 251.66 nm f=0.8048**  
**<S\*\*2>=0.000**  
 481 -> 521 0.31739  
 486 -> 523 0.24129  
 487 -> 522 0.24129  
 493 -> 524 0.12680  
 505 -> 524 0.16249  
 510 -> 522 -0.12257

511 -> 523 -0.12257  
 513 -> 521 0.24115  
 516 -> 524 0.11600  
 Excited State 110: Singlet-EG 4.9675 eV 249.59 nm f=0.0000 <S\*\*2>=0.000  
 Excited State 111: Singlet-EG 4.9675 eV 249.59 nm f=0.0000 <S\*\*2>=0.000  
 Excited State 112: Singlet-A1G 4.9830 eV 248.82 nm f=0.0000 <S\*\*2>=0.000  
**Excited State 113: Singlet-EU 4.9967 eV 248.13 nm f=0.3488**  
**<S\*\*2>=0.000**  
 481 -> 526 0.12715  
 487 -> 525 -0.14991  
 493 -> 526 -0.18437  
 494 -> 528 0.16988  
 497 -> 526 0.10011  
 502 -> 521 -0.10470  
 504 -> 523 -0.10206  
 509 -> 526 -0.11133  
 510 -> 528 0.12887  
 512 -> 527 0.12360  
 514 -> 528 0.23274  
 516 -> 526 0.26276  
 518 -> 529 0.11268  
 520 -> 531 -0.11272  
**Excited State 114: Singlet-EU 4.9967 eV 248.13 nm f=0.3488**  
**<S\*\*2>=0.000**  
 481 -> 527 -0.12715  
 486 -> 525 -0.14991  
 493 -> 527 -0.18437  
 495 -> 528 -0.16988  
 497 -> 527 -0.10011  
 503 -> 521 -0.10470  
 504 -> 522 0.10207  
 509 -> 527 -0.11133  
 511 -> 528 -0.12888  
 512 -> 526 0.12359  
 515 -> 528 -0.23274  
 516 -> 527 0.26276  
 519 -> 529 -0.11268  
 520 -> 530 -0.11273  
 Excited State 115: Singlet-B2G 5.0229 eV 246.84 nm f=0.0000 <S\*\*2>=0.000  
 Excited State 116: Singlet-B2U 5.0238 eV 246.79 nm f=0.0000 <S\*\*2>=0.000  
 Excited State 117: Singlet-B1U 5.0405 eV 245.98 nm f=0.0000 <S\*\*2>=0.000  
 Excited State 118: Singlet-EG 5.0663 eV 244.72 nm f=0.0000 <S\*\*2>=0.000  
 Excited State 119: Singlet-EG 5.0663 eV 244.72 nm f=0.0000 <S\*\*2>=0.000  
 Excited State 120: Singlet-A1U 5.0760 eV 244.25 nm f=0.0000 <S\*\*2>=0.000  
**Excited State 121: Singlet-A2U 5.1337 eV 241.51 nm f=0.0567**  
**<S\*\*2>=0.000**

469 -> 524 0.28997  
 470 -> 522 -0.31132  
 471 -> 523 0.31132  
 472 -> 521 0.33617  
 Excited State 122: Singlet-EG 5.1397 eV 241.23 nm f=0.0000 <S\*\*2>=0.000  
 Excited State 123: Singlet-EG 5.1397 eV 241.23 nm f=0.0000 <S\*\*2>=0.000  
 Excited State 124: Singlet-B2U 5.1456 eV 240.95 nm f=0.0000 <S\*\*2>=0.000  
 Excited State 125: Singlet-B1G 5.1464 eV 240.92 nm f=0.0000 <S\*\*2>=0.000  
**Excited State 126: Singlet-EU 5.1578 eV 240.38 nm f=0.0010**  
**<S\*\*2>=0.000**  
 484 -> 529 0.10465  
 494 -> 525 -0.15710  
 494 -> 528 -0.12823  
 496 -> 527 0.23709  
 498 -> 525 0.18690  
 498 -> 528 0.18509  
 500 -> 527 0.21833  
 517 -> 531 -0.13862  
 518 -> 529 0.18177  
 518 -> 532 -0.12390  
 520 -> 531 -0.16281  
**Excited State 127: Singlet-EU 5.1578 eV 240.38 nm f=0.0010**  
**<S\*\*2>=0.000**  
 485 -> 529 -0.10465  
 495 -> 525 -0.15710  
 495 -> 528 0.12823  
 496 -> 526 0.23708  
 499 -> 525 -0.18690  
 499 -> 528 0.18509  
 500 -> 526 -0.21833  
 517 -> 530 0.13862  
 519 -> 529 -0.18177  
 519 -> 532 -0.12390  
 520 -> 530 -0.16281  
 Excited State 128: Singlet-A1G 5.1723 eV 239.71 nm f=0.0000 <S\*\*2>=0.000  
 Excited State 129: Singlet-B2U 5.3064 eV 233.65 nm f=0.0000 <S\*\*2>=0.000  
 Excited State 130: Singlet-EG 5.3104 eV 233.47 nm f=0.0000 <S\*\*2>=0.000  
 Excited State 131: Singlet-EG 5.3104 eV 233.47 nm f=0.0000 <S\*\*2>=0.000  
**Excited State 132: Singlet-A2U 5.3154 eV 233.25 nm f=0.1365**  
**<S\*\*2>=0.000**  
 482 -> 528 0.24131  
 483 -> 525 0.25637  
 484 -> 527 0.24854  
 485 -> 526 0.24854  
 494 -> 522 -0.11666  
 495 -> 523 -0.11666

496 -> 532 -0.11245  
 497 -> 521 -0.15354  
 500 -> 529 0.11191  
 Excited State 133: Singlet-B2U 5.4359 eV 228.08 nm f=0.0000 <S\*\*2>=0.000  
 Excited State 134: Singlet-EG 5.4360 eV 228.08 nm f=0.0000 <S\*\*2>=0.000  
 Excited State 135: Singlet-EG 5.4360 eV 228.08 nm f=0.0000 <S\*\*2>=0.000  
 Excited State 136: Singlet-?Sym 5.4402 eV 227.90 nm f=0.0000 <S\*\*2>=0.000  
**Excited State 137: Singlet-EU 5.4481 eV 227.57 nm f=0.0005**  
**<S\*\*2>=0.000**  
 469 -> 526 -0.25050  
 469 -> 527 0.14526  
 470 -> 525 0.25593  
 470 -> 528 -0.24269  
 471 -> 525 0.14838  
 471 -> 528 0.14072  
 472 -> 526 0.24761  
 472 -> 527 0.14357  
 473 -> 530 -0.10439  
 477 -> 529 0.11714  
 480 -> 530 0.10478  
 Excited State 138: Singlet-?Sym 5.4520 eV 227.41 nm f=0.0000 <S\*\*2>=0.000  
 Excited State 139: Singlet-EG 5.4673 eV 226.78 nm f=0.0000 <S\*\*2>=0.000  
 Excited State 140: Singlet-EG 5.4673 eV 226.78 nm f=0.0000 <S\*\*2>=0.000

PcTube02\_LC-wPBE\_TDDFT

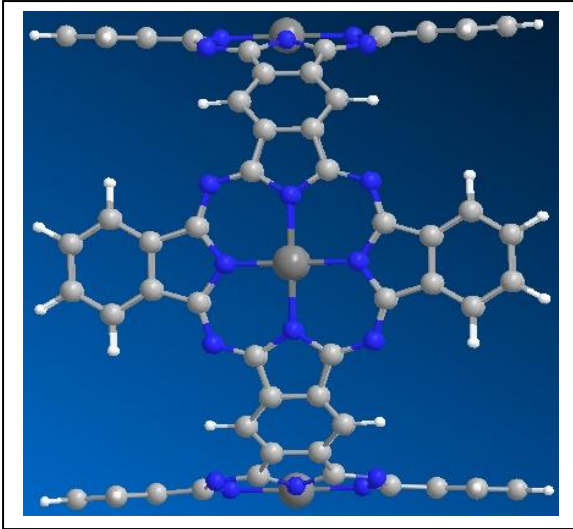

Excited State 1: Singlet-A2G 0.9686 eV 1280.06 nm f=0.0000  $\langle S^{*2} \rangle = 0.000$

**Excited State 2: Singlet-EU 1.7396 eV 712.70 nm f=1.1704  $\langle S^{*2} \rangle = 0.000$**

501 -> 508 -0.20094  
 503 -> 505 0.45554  
 503 -> 512 -0.18147  
 504 -> 508 0.41029

**Excited State 3: Singlet-EU 1.7396 eV 712.70 nm f=1.1704  $\langle S^{*2} \rangle = 0.000$**

501 -> 507 0.20094  
 502 -> 505 0.45554  
 502 -> 512 0.18147  
 504 -> 507 0.41029

**Excited State 4: Singlet-A2U 1.8574 eV 667.52 nm f=1.1779**  
 **$\langle S^{*2} \rangle = 0.000$**

498 -> 507 0.10288  
 499 -> 508 0.10288  
 500 -> 505 0.13296  
 501 -> 511 0.20031  
 502 -> 509 0.28830  
 503 -> 510 0.28831  
 504 -> 506 0.49695

Excited State 5: Singlet-EG 1.8708 eV 662.75 nm f=0.0000  $\langle S^{*2} \rangle = 0.000$

Excited State 6: Singlet-EG 1.8708 eV 662.75 nm f=0.0000  $\langle S^{*2} \rangle = 0.000$

Excited State 7: Singlet-B2U 1.9130 eV 648.10 nm f=0.0000  $\langle S^{*2} \rangle = 0.000$

Excited State 8: Singlet-B2G 2.1400 eV 579.37 nm f=0.0000  $\langle S^{*2} \rangle = 0.000$

**Excited State 9: Singlet-EU 2.7874 eV 444.80 nm f=0.0207  $\langle S^{*2} \rangle = 0.000$**

501 -> 507 -0.12489  
 502 -> 505 -0.41856  
 502 -> 512 0.10115  
 503 -> 505 0.14582  
 504 -> 507 0.47907  
 504 -> 508 -0.16690

**Excited State 10: Singlet-EU 2.7874 eV 444.80 nm f=0.0207**

**<S\*\*2>=0.000**

501 -> 508 0.12489  
502 -> 505 -0.14582  
503 -> 505 -0.41856  
503 -> 512 -0.10115  
504 -> 507 0.16690  
504 -> 508 0.47907

Excited State 11: Singlet-A2G 2.9666 eV 417.93 nm f=0.0000 <S\*\*2>=0.000

Excited State 12: Singlet-?Sym 3.1517 eV 393.39 nm f=0.0000 <S\*\*2>=0.000

Excited State 13: Singlet-B2G 3.2680 eV 379.39 nm f=0.0000 <S\*\*2>=0.000

Excited State 14: Singlet-?Sym 3.2693 eV 379.23 nm f=0.0000 <S\*\*2>=0.000

Excited State 15: Singlet-EG 3.3076 eV 374.85 nm f=0.0000 <S\*\*2>=0.000

Excited State 16: Singlet-EG 3.3076 eV 374.85 nm f=0.0000 <S\*\*2>=0.000

**Excited State 17: Singlet-A2U 3.3099 eV 374.59 nm f=0.0425**

**<S\*\*2>=0.000**

501 -> 511 -0.27695  
502 -> 509 -0.26452  
503 -> 510 -0.26452  
504 -> 506 0.49306

Excited State 18: Singlet-B2U 3.3894 eV 365.80 nm f=0.0000 <S\*\*2>=0.000

**Excited State 19: Singlet-EU 3.4581 eV 358.53 nm f=0.5800**

**<S\*\*2>=0.000**

497 -> 510 -0.11433  
499 -> 506 0.11898  
499 -> 511 -0.11340  
500 -> 510 0.11835  
501 -> 507 0.12262  
501 -> 508 0.39113  
502 -> 512 0.10159  
503 -> 505 0.24169  
503 -> 512 0.32404  
504 -> 508 0.15141  
504 -> 517 0.11955

**Excited State 20: Singlet-EU 3.4581 eV 358.53 nm f=0.5799**

**<S\*\*2>=0.000**

497 -> 509 0.11433  
498 -> 506 0.11898  
498 -> 511 0.11340  
500 -> 509 0.11835  
501 -> 507 -0.39113  
501 -> 508 0.12262  
502 -> 505 0.24169  
502 -> 512 -0.32404  
503 -> 512 0.10159  
504 -> 507 0.15141

504 -> 518    -0.11956  
 Excited State 21:    Singlet-?Sym    3.4725 eV 357.05 nm f=0.0000 <S\*\*2>=0.000  
 Excited State 22:    Singlet-?Sym    3.5027 eV 353.96 nm f=0.0000 <S\*\*2>=0.000  
 Excited State 23:    Singlet-EG    3.5287 eV 351.36 nm f=0.0000 <S\*\*2>=0.000  
 Excited State 24:    Singlet-EG    3.5287 eV 351.36 nm f=0.0000 <S\*\*2>=0.000  
**Excited State 25:    Singlet-A2U    3.6560 eV 339.12 nm f=0.3685**  
**<S\*\*2>=0.000**  
 472 -> 512    0.19009  
 475 -> 507    -0.12865  
 476 -> 508    -0.12865  
 481 -> 508    -0.13647  
 482 -> 507    0.13648  
 486 -> 507    -0.15590  
 487 -> 508    -0.15591  
 488 -> 505    0.31029  
 494 -> 508    -0.10546  
 495 -> 507    0.10546  
 496 -> 505    -0.21859  
 497 -> 512    -0.13860  
 498 -> 507    -0.16441  
 499 -> 508    -0.16441  
 500 -> 505    -0.22984  
 Excited State 26:    Singlet-EG    3.6733 eV 337.53 nm f=0.0000 <S\*\*2>=0.000  
 Excited State 27:    Singlet-EG    3.6733 eV 337.53 nm f=0.0000 <S\*\*2>=0.000  
 Excited State 28:    Singlet-B2U    3.6873 eV 336.24 nm f=0.0000 <S\*\*2>=0.000  
 Excited State 29:    Singlet-A2G    3.7622 eV 329.55 nm f=0.0000 <S\*\*2>=0.000  
**Excited State 30:    Singlet-EU    3.8158 eV 324.93 nm f=0.0560**  
**<S\*\*2>=0.000**  
 472 -> 509    0.14210  
 472 -> 510    -0.19547  
 476 -> 506    -0.12756  
 476 -> 511    0.10692  
 481 -> 506    -0.12039  
 481 -> 511    0.10268  
 486 -> 506    -0.10345  
 487 -> 506    -0.14231  
 487 -> 511    0.12898  
 488 -> 509    0.14237  
 488 -> 510    0.19585  
 497 -> 509    -0.10842  
 497 -> 510    0.14914  
 498 -> 506    -0.12082  
 499 -> 506    -0.16620  
 499 -> 511    0.13671  
 500 -> 509    -0.11137  
 500 -> 510    -0.15320

501 -> 508 0.11619  
**Excited State 31: Singlet-EU 3.8158 eV 324.93 nm f=0.0560**  
**<S\*\*2>=0.000**  
 472 -> 509 -0.19547  
 472 -> 510 -0.14210  
 475 -> 506 0.12756  
 475 -> 511 0.10692  
 482 -> 506 -0.12039  
 482 -> 511 -0.10269  
 486 -> 506 0.14231  
 486 -> 511 0.12897  
 487 -> 506 -0.10345  
 488 -> 509 -0.19585  
 488 -> 510 0.14237  
 497 -> 509 0.14914  
 497 -> 510 0.10842  
 498 -> 506 0.16620  
 498 -> 511 0.13671  
 499 -> 506 -0.12082  
 500 -> 509 0.15320  
 500 -> 510 -0.11137  
 501 -> 507 0.11619  
 Excited State 32: Singlet-B2G 3.8179 eV 324.74 nm f=0.0000 <S\*\*2>=0.000  
 Excited State 33: Singlet-B2G 3.9607 eV 313.04 nm f=0.0000 <S\*\*2>=0.000  
 Excited State 34: Singlet-B1U 3.9749 eV 311.92 nm f=0.0000 <S\*\*2>=0.000  
 Excited State 35: Singlet-EG 4.0202 eV 308.40 nm f=0.0000 <S\*\*2>=0.000  
 Excited State 36: Singlet-EG 4.0202 eV 308.40 nm f=0.0000 <S\*\*2>=0.000  
**Excited State 37: Singlet-A2U 4.0639 eV 305.09 nm f=0.0157**  
**<S\*\*2>=0.000**  
 473 -> 505 -0.27493  
 475 -> 507 -0.15130  
 476 -> 508 -0.15130  
 488 -> 505 0.11734  
 493 -> 513 0.12476  
 494 -> 508 0.23105  
 495 -> 507 -0.23106  
 496 -> 505 0.39268  
 500 -> 505 -0.10932  
 504 -> 519 -0.10291  
 Excited State 38: Singlet-A2G 4.1623 eV 297.87 nm f=0.0000 <S\*\*2>=0.000  
 Excited State 39: Singlet-A2G 4.1927 eV 295.71 nm f=0.0000 <S\*\*2>=0.000  
 Excited State 40: Singlet-B2U 4.1939 eV 295.63 nm f=0.0000 <S\*\*2>=0.000  
**Excited State 41: Singlet-EU 4.1968 eV 295.43 nm f=0.0125**  
**<S\*\*2>=0.000**  
 468 -> 508 -0.14014  
 469 -> 508 0.24821



471 -> 505 0.37097  
471 -> 512 -0.20061  
474 -> 508 0.25653  
477 -> 508 -0.14272  
479 -> 505 -0.13391

**Excited State 42: Singlet-EU 4.1968 eV 295.43 nm f=0.0125**

**<S\*\*2>=0.000**

468 -> 507 0.14014  
469 -> 507 0.24821  
470 -> 505 -0.37096  
470 -> 512 -0.20061  
474 -> 507 -0.25653  
477 -> 507 -0.14271  
478 -> 505 -0.13391

Excited State 43: Singlet-B2G 4.1984 eV 295.31 nm f=0.0000 <S\*\*2>=0.000

Excited State 44: Singlet-B1G 4.2091 eV 294.56 nm f=0.0000 <S\*\*2>=0.000

Excited State 45: Singlet-EG 4.2216 eV 293.69 nm f=0.0000 <S\*\*2>=0.000

Excited State 46: Singlet-EG 4.2216 eV 293.69 nm f=0.0000 <S\*\*2>=0.000

Excited State 47: Singlet-B2U 4.2554 eV 291.36 nm f=0.0000 <S\*\*2>=0.000

**Excited State 48: Singlet-A2U 4.2747 eV 290.04 nm f=0.6172**

**<S\*\*2>=0.000**

468 -> 511 0.12982  
469 -> 506 0.24134  
470 -> 509 -0.23218  
471 -> 510 0.23217  
472 -> 512 -0.10339  
473 -> 505 0.11441  
474 -> 511 -0.20414  
475 -> 507 0.10140  
476 -> 508 0.10139  
477 -> 506 -0.10306  
488 -> 505 -0.13263  
498 -> 507 -0.12701  
499 -> 508 -0.12700  
500 -> 505 -0.22512  
501 -> 511 0.11123

Excited State 49: Singlet-EG 4.3004 eV 288.31 nm f=0.0000 <S\*\*2>=0.000

Excited State 50: Singlet-EG 4.3004 eV 288.31 nm f=0.0000 <S\*\*2>=0.000

**Excited State 51: Singlet-EU 4.3119 eV 287.54 nm f=0.0003**

**<S\*\*2>=0.000**

501 -> 507 -0.11043  
501 -> 508 0.26813  
501 -> 517 0.13989  
502 -> 512 0.17762  
502 -> 513 0.20373  
503 -> 512 -0.43123

504 -> 508 -0.17348  
 504 -> 517 0.11264  
**Excited State 52: Singlet-EU 4.3119 eV 287.54 nm f=0.0003**  
**<S\*\*2>=0.000**  
 501 -> 507 -0.26813  
 501 -> 508 -0.11044  
 501 -> 518 0.13989  
 502 -> 512 0.43123  
 503 -> 512 0.17762  
 503 -> 513 0.20373  
 504 -> 507 -0.17348  
 504 -> 518 -0.11263  
**Excited State 53: Singlet-B2U 4.3334 eV 286.11 nm f=0.0000 <S\*\*2>=0.000**  
**Excited State 54: Singlet-EU 4.3395 eV 285.71 nm f=0.6092**  
**<S\*\*2>=0.000**  
 472 -> 510 -0.15431  
 473 -> 510 -0.18319  
 476 -> 506 -0.18767  
 476 -> 511 0.19441  
 485 -> 510 0.21521  
 487 -> 506 0.11567  
 487 -> 511 -0.10632  
 494 -> 506 -0.18515  
 494 -> 511 0.11985  
 496 -> 510 -0.19858  
 499 -> 506 0.13097  
 500 -> 510 0.14183  
 501 -> 508 -0.15986  
**Excited State 55: Singlet-EU 4.3395 eV 285.71 nm f=0.6092**  
**<S\*\*2>=0.000**  
 472 -> 509 -0.15431  
 473 -> 509 0.18319  
 475 -> 506 0.18768  
 475 -> 511 0.19440  
 485 -> 509 0.21521  
 486 -> 506 -0.11567  
 486 -> 511 -0.10632  
 495 -> 506 -0.18516  
 495 -> 511 -0.11986  
 496 -> 509 0.19858  
 498 -> 506 -0.13097  
 500 -> 509 -0.14183  
 501 -> 507 -0.15986  
**Excited State 56: Singlet-EG 4.3434 eV 285.45 nm f=0.0000 <S\*\*2>=0.000**  
**Excited State 57: Singlet-EG 4.3434 eV 285.45 nm f=0.0000 <S\*\*2>=0.000**  
**Excited State 58: Singlet-B1U 4.3439 eV 285.42 nm f=0.0000 <S\*\*2>=0.000**

Excited State 59: Singlet-A1U 4.3512 eV 284.94 nm f=0.0000 <S\*\*2>=0.000

**Excited State 60: Singlet-A2U 4.3519 eV 284.89 nm f=1.9492**

**<S\*\*2>=0.000**

469 -> 506 0.13148  
470 -> 509 -0.14304  
471 -> 510 0.14304  
473 -> 505 -0.10329  
474 -> 511 -0.14807  
477 -> 506 -0.10573  
496 -> 505 -0.12350  
498 -> 507 0.15644  
499 -> 508 0.15643  
500 -> 505 0.30151  
501 -> 511 0.19208  
502 -> 509 -0.24266  
503 -> 510 -0.24266

Excited State 61: Singlet-EG 4.3667 eV 283.93 nm f=0.0000 <S\*\*2>=0.000

Excited State 62: Singlet-EG 4.3667 eV 283.93 nm f=0.0000 <S\*\*2>=0.000

Excited State 63: Singlet-B2G 4.3863 eV 282.66 nm f=0.0000 <S\*\*2>=0.000

**Excited State 64: Singlet-EU 4.3950 eV 282.11 nm f=0.0102**

**<S\*\*2>=0.000**

461 -> 507 -0.10828  
464 -> 507 -0.13071  
467 -> 505 -0.16183  
492 -> 507 0.11925  
501 -> 508 0.31247  
502 -> 513 -0.18315  
502 -> 523 -0.13825  
503 -> 505 0.10763  
503 -> 512 -0.16729  
504 -> 517 -0.27661

**Excited State 65: Singlet-EU 4.3950 eV 282.11 nm f=0.0102**

**<S\*\*2>=0.000**

461 -> 508 0.10828  
464 -> 508 -0.13070  
466 -> 505 0.16183  
492 -> 508 -0.11925  
501 -> 507 0.31247  
502 -> 505 -0.10763  
502 -> 512 -0.16729  
503 -> 513 0.18315  
503 -> 523 -0.13825  
504 -> 518 -0.27661

Excited State 66: Singlet-B1U 4.4011 eV 281.71 nm f=0.0000 <S\*\*2>=0.000

Excited State 67: Singlet-A1G 4.4409 eV 279.18 nm f=0.0000 <S\*\*2>=0.000

**Excited State 68: Singlet-A2U 4.4477 eV 278.76 nm f=1.0483**

**<S\*\*2>=0.000**

|            |          |
|------------|----------|
| 474 -> 511 | 0.12831  |
| 477 -> 506 | 0.13431  |
| 478 -> 509 | 0.11450  |
| 479 -> 510 | 0.11450  |
| 501 -> 511 | 0.50861  |
| 502 -> 509 | -0.16198 |
| 503 -> 510 | -0.16198 |
| 504 -> 519 | -0.13586 |

Excited State 69: Singlet-A2G 4.4563 eV 278.22 nm f=0.0000 <S\*\*2>=0.000

Excited State 70: Singlet-EG 4.5176 eV 274.45 nm f=0.0000 <S\*\*2>=0.000

Excited State 71: Singlet-EG 4.5176 eV 274.45 nm f=0.0000 <S\*\*2>=0.000

Excited State 72: Singlet-A1U 4.5346 eV 273.42 nm f=0.0000 <S\*\*2>=0.000

Excited State 73: Singlet-B1G 4.5776 eV 270.85 nm f=0.0000 <S\*\*2>=0.000

**Excited State 74: Singlet-EU 4.6085 eV 269.03 nm f=0.6217**

**<S\*\*2>=0.000**

|            |          |
|------------|----------|
| 458 -> 505 | 0.13660  |
| 461 -> 508 | 0.17419  |
| 464 -> 508 | -0.17646 |
| 466 -> 505 | 0.22335  |
| 466 -> 512 | -0.10849 |
| 482 -> 506 | -0.11646 |
| 485 -> 509 | -0.10715 |
| 486 -> 511 | 0.13986  |
| 488 -> 509 | -0.12840 |
| 497 -> 509 | -0.12968 |
| 498 -> 506 | -0.12652 |
| 498 -> 511 | -0.10038 |
| 500 -> 509 | -0.10036 |
| 501 -> 507 | -0.10837 |
| 504 -> 518 | 0.14005  |

**Excited State 75: Singlet-EU 4.6085 eV 269.03 nm f=0.6217**

**<S\*\*2>=0.000**

|            |          |
|------------|----------|
| 459 -> 505 | 0.13661  |
| 461 -> 507 | 0.17419  |
| 464 -> 507 | 0.17646  |
| 467 -> 505 | 0.22336  |
| 467 -> 512 | 0.10849  |
| 481 -> 506 | 0.11646  |
| 485 -> 510 | 0.10715  |
| 487 -> 511 | -0.13986 |
| 488 -> 510 | -0.12840 |
| 497 -> 510 | 0.12968  |
| 499 -> 506 | -0.12652 |
| 499 -> 511 | 0.10038  |

500 -> 510 -0.10037  
 501 -> 508 0.10837  
 504 -> 517 -0.14005  
 Excited State 76: Singlet-A1U 4.6130 eV 268.77 nm f=0.0000 <S\*\*2>=0.000  
 Excited State 77: Singlet-EG 4.6162 eV 268.59 nm f=0.0000 <S\*\*2>=0.000  
 Excited State 78: Singlet-EG 4.6162 eV 268.59 nm f=0.0000 <S\*\*2>=0.000  
 Excited State 79: Singlet-B1G 4.6272 eV 267.94 nm f=0.0000 <S\*\*2>=0.000  
 Excited State 80: Singlet-B1U 4.6329 eV 267.62 nm f=0.0000 <S\*\*2>=0.000  
**Excited State 81: Singlet-EU 4.6528 eV 266.47 nm f=0.5931**  
**<S\*\*2>=0.000**  
 461 -> 507 -0.10419  
 464 -> 507 -0.11423  
 467 -> 505 -0.13178  
 481 -> 511 -0.11389  
 485 -> 510 0.11181  
 487 -> 506 0.16453  
 488 -> 510 -0.15246  
 489 -> 507 0.10253  
 494 -> 511 0.10381  
 497 -> 510 0.14389  
 499 -> 506 -0.16610  
 499 -> 511 0.10588  
 500 -> 510 -0.12901  
 503 -> 512 0.12999  
 504 -> 517 0.10006  
**Excited State 82: Singlet-EU 4.6528 eV 266.47 nm f=0.5932**  
**<S\*\*2>=0.000**  
 461 -> 508 -0.10419  
 464 -> 508 0.11423  
 466 -> 505 -0.13178  
 482 -> 511 -0.11389  
 485 -> 509 -0.11181  
 486 -> 506 0.16452  
 488 -> 509 -0.15246  
 489 -> 508 -0.10253  
 495 -> 511 0.10381  
 497 -> 509 -0.14390  
 498 -> 506 -0.16610  
 498 -> 511 -0.10589  
 500 -> 509 -0.12901  
 502 -> 512 -0.12999  
 504 -> 518 -0.10006  
 Excited State 83: Singlet-A1G 4.6648 eV 265.79 nm f=0.0000 <S\*\*2>=0.000  
 Excited State 84: Singlet-A2G 4.6669 eV 265.67 nm f=0.0000 <S\*\*2>=0.000  
 Excited State 85: Singlet-EG 4.6939 eV 264.14 nm f=0.0000 <S\*\*2>=0.000  
 Excited State 86: Singlet-EG 4.6939 eV 264.14 nm f=0.0000 <S\*\*2>=0.000

Excited State 87: Singlet-B2G 4.7032 eV 263.62 nm f=0.0000 <S\*\*2>=0.000

**Excited State 88: Singlet-EU 4.7177 eV 262.80 nm f=0.0863**

**<S\*\*2>=0.000**

460 -> 510 -0.17558

462 -> 506 0.10673

463 -> 506 0.19565

463 -> 511 -0.17052

465 -> 509 0.10468

465 -> 510 0.19190

478 -> 505 0.18023

484 -> 508 0.11266

**Excited State 89: Singlet-EU 4.7177 eV 262.80 nm f=0.0863**

**<S\*\*2>=0.000**

460 -> 509 0.17558

462 -> 506 0.19565

462 -> 511 0.17052

463 -> 506 -0.10672

465 -> 509 0.19190

465 -> 510 -0.10468

479 -> 505 0.18023

484 -> 507 0.11266

Excited State 90: Singlet-?Sym 4.7289 eV 262.19 nm f=0.0000 <S\*\*2>=0.000

Excited State 91: Singlet-B1U 4.7290 eV 262.18 nm f=0.0000 <S\*\*2>=0.000

Excited State 92: Singlet-EG 4.7469 eV 261.19 nm f=0.0000 <S\*\*2>=0.000

Excited State 93: Singlet-EG 4.7469 eV 261.19 nm f=0.0000 <S\*\*2>=0.000

Excited State 94: Singlet-A1U 4.7543 eV 260.79 nm f=0.0000 <S\*\*2>=0.000

Excited State 95: Singlet-A1G 4.7780 eV 259.49 nm f=0.0000 <S\*\*2>=0.000

Excited State 96: Singlet-B1G 4.7889 eV 258.90 nm f=0.0000 <S\*\*2>=0.000

**Excited State 97: Singlet-A2U 4.8005 eV 258.27 nm f=0.0170**

**<S\*\*2>=0.000**

496 -> 505 0.10369

500 -> 505 -0.10371

501 -> 511 0.21554

502 -> 515 0.23196

502 -> 522 0.10011

503 -> 516 -0.23196

503 -> 521 -0.10012

504 -> 519 0.52033

Excited State 98: Singlet-A1U 4.8051 eV 258.03 nm f=0.0000 <S\*\*2>=0.000

**Excited State 99: Singlet-EU 4.8100 eV 257.76 nm f=0.0678**

**<S\*\*2>=0.000**

458 -> 505 -0.12306

460 -> 509 -0.11011

460 -> 510 -0.15063

461 -> 508 -0.10346

462 -> 506 -0.11406

462 -> 511 -0.10443  
463 -> 506 0.15604  
463 -> 511 -0.14286  
465 -> 509 -0.11109  
465 -> 510 0.15197  
475 -> 506 -0.11887  
478 -> 505 -0.11923  
480 -> 510 0.10395  
495 -> 506 -0.10100

**Excited State 100: Singlet-EU 4.8100 eV 257.76 nm f=0.0678**

**<S\*\*2>=0.000**

459 -> 505 -0.12307  
460 -> 509 0.15063  
460 -> 510 -0.11011  
461 -> 507 -0.10346  
462 -> 506 0.15604  
462 -> 511 0.14286  
463 -> 506 0.11406  
463 -> 511 -0.10443  
465 -> 509 0.15197  
465 -> 510 0.11109  
476 -> 506 -0.11887  
479 -> 505 -0.11922  
480 -> 509 0.10394  
494 -> 506 0.10100

**Excited State 101: Singlet-B1G 4.8312 eV 256.63 nm f=0.0000 <S\*\*2>=0.000**

**Excited State 102: Singlet-EG 4.9058 eV 252.73 nm f=0.0000 <S\*\*2>=0.000**

**Excited State 103: Singlet-EG 4.9058 eV 252.73 nm f=0.0000 <S\*\*2>=0.000**

**Excited State 104: Singlet-EU 4.9065 eV 252.69 nm f=0.0090**

**<S\*\*2>=0.000**

480 -> 509 0.11248  
481 -> 506 0.13080  
483 -> 509 0.13345  
489 -> 507 -0.15811  
490 -> 505 0.27923  
490 -> 512 0.12219  
492 -> 507 0.16793  
502 -> 513 0.18703  
504 -> 517 0.27193

**Excited State 105: Singlet-EU 4.9065 eV 252.69 nm f=0.0090**

**<S\*\*2>=0.000**

480 -> 510 -0.11248  
482 -> 506 0.13080  
483 -> 510 0.13345  
489 -> 508 -0.15812  
491 -> 505 0.27924

491 -> 512 -0.12219

492 -> 508 -0.16793

503 -> 513 -0.18703

504 -> 518 0.27193

Excited State 106: Singlet-B2U 4.9231 eV 251.84 nm f=0.0000 <S\*\*2>=0.000

**Excited State 107: Singlet-A2U 4.9718 eV 249.38 nm f=0.5664**

**<S\*\*2>=0.000**

468 -> 511 0.13223

473 -> 505 0.23500

475 -> 507 0.12616

476 -> 508 0.12616

477 -> 506 0.11319

478 -> 509 0.10049

479 -> 510 0.10050

485 -> 512 0.16521

486 -> 507 -0.14495

487 -> 508 -0.14495

488 -> 505 0.21926

489 -> 520 -0.10200

496 -> 505 0.12556

500 -> 505 0.13575

Excited State 108: Singlet-A2G 4.9814 eV 248.89 nm f=0.0000 <S\*\*2>=0.000

Excited State 109: Singlet-EG 5.0092 eV 247.51 nm f=0.0000 <S\*\*2>=0.000

Excited State 110: Singlet-EG 5.0092 eV 247.51 nm f=0.0000 <S\*\*2>=0.000

Excited State 111: Singlet-A1G 5.0632 eV 244.87 nm f=0.0000 <S\*\*2>=0.000

Excited State 112: Singlet-B1G 5.0748 eV 244.31 nm f=0.0000 <S\*\*2>=0.000

Excited State 113: Singlet-B1U 5.0791 eV 244.10 nm f=0.0000 <S\*\*2>=0.000

**Excited State 114: Singlet-EU 5.1022 eV 243.00 nm f=0.1124**

**<S\*\*2>=0.000**

483 -> 509 -0.13239

483 -> 510 -0.12100

489 -> 507 -0.12043

489 -> 508 -0.11007

490 -> 505 0.24432

491 -> 505 0.22332

492 -> 507 0.13792

492 -> 508 -0.12606

493 -> 509 0.17697

493 -> 510 -0.16174

494 -> 506 0.17461

495 -> 506 0.15960

**Excited State 115: Singlet-EU 5.1022 eV 243.00 nm f=0.1124**

**<S\*\*2>=0.000**

483 -> 509 0.12100

483 -> 510 -0.13239

489 -> 507 0.11007



489 -> 508 -0.12043  
 490 -> 505 -0.22332  
 491 -> 505 0.24433  
 492 -> 507 -0.12605  
 492 -> 508 -0.13792  
 493 -> 509 -0.16175  
 493 -> 510 -0.17696  
 494 -> 506 -0.15959  
 495 -> 506 0.17461  
**Excited State 116:** Singlet-A1G 5.1126 eV 242.51 nm f=0.0000 <S\*\*2>=0.000  
**Excited State 117:** Singlet-?Sym 5.1179 eV 242.25 nm f=0.0000 <S\*\*2>=0.000  
**Excited State 118:** Singlet-B1G 5.1231 eV 242.01 nm f=0.0000 <S\*\*2>=0.000  
**Excited State 119:** Singlet-EU 5.1525 eV 240.63 nm f=0.3709  
 <S\*\*2>=0.000  
 471 -> 505 0.13146  
 473 -> 510 -0.12539  
 476 -> 506 -0.14459  
 478 -> 505 0.13036  
 479 -> 505 0.28837  
 480 -> 509 0.13864  
 481 -> 506 0.11857  
 483 -> 509 0.10372  
 484 -> 507 0.17074  
 489 -> 507 0.10584  
 490 -> 505 -0.10504  
 494 -> 506 0.17058  
 496 -> 510 0.13517  
**Excited State 120:** Singlet-EU 5.1525 eV 240.63 nm f=0.3709  
 <S\*\*2>=0.000  
 470 -> 505 -0.13145  
 473 -> 509 -0.12539  
 475 -> 506 -0.14460  
 478 -> 505 0.28838  
 479 -> 505 -0.13037  
 480 -> 510 0.13864  
 482 -> 506 -0.11858  
 483 -> 510 -0.10372  
 484 -> 508 0.17075  
 489 -> 508 -0.10585  
 491 -> 505 0.10504  
 495 -> 506 -0.17058  
 496 -> 509 0.13518  
**Excited State 121:** Singlet-EG 5.1687 eV 239.88 nm f=0.0000 <S\*\*2>=0.000  
**Excited State 122:** Singlet-EG 5.1687 eV 239.88 nm f=0.0000 <S\*\*2>=0.000  
**Excited State 123:** Singlet-A2G 5.1906 eV 238.86 nm f=0.0000 <S\*\*2>=0.000  
**Excited State 124:** Singlet-A1U 5.1998 eV 238.44 nm f=0.0000 <S\*\*2>=0.000

Excited State 125: Singlet-B1U 5.2292 eV 237.10 nm f=0.0000 <S\*\*2>=0.000  
Excited State 126: Singlet-EG 5.2354 eV 236.82 nm f=0.0000 <S\*\*2>=0.000  
Excited State 127: Singlet-EG 5.2354 eV 236.82 nm f=0.0000 <S\*\*2>=0.000  
Excited State 128: Singlet-A1U 5.2516 eV 236.09 nm f=0.0000 <S\*\*2>=0.000

**Excited State 129: Singlet-A2U 5.2765 eV 234.98 nm f=0.6750  
<S\*\*2>=0.000**

468 -> 511 -0.17233  
469 -> 506 -0.13902  
473 -> 505 0.25077  
477 -> 506 -0.21101  
478 -> 509 -0.18817  
479 -> 510 -0.18821  
485 -> 512 0.10654  
486 -> 507 -0.15771  
487 -> 508 -0.15773  
488 -> 505 0.19125  
496 -> 505 0.13927

Excited State 130: Singlet-EG 5.2793 eV 234.85 nm f=0.0000 <S\*\*2>=0.000  
Excited State 131: Singlet-EG 5.2793 eV 234.85 nm f=0.0000 <S\*\*2>=0.000  
Excited State 132: Singlet-A2G 5.2809 eV 234.78 nm f=0.0000 <S\*\*2>=0.000  
Excited State 133: Singlet-B2U 5.2836 eV 234.66 nm f=0.0000 <S\*\*2>=0.000  
Excited State 134: Singlet-A1G 5.3075 eV 233.60 nm f=0.0000 <S\*\*2>=0.000

**Excited State 135: Singlet-EU 5.3081 eV 233.58 nm f=0.0214  
<S\*\*2>=0.000**

453 -> 509 0.13546  
455 -> 506 0.14545  
455 -> 511 0.12863  
456 -> 509 0.13794  
493 -> 510 0.11458  
501 -> 518 0.11373  
501 -> 527 0.13277  
502 -> 525 0.22096  
502 -> 528 0.18089  
504 -> 518 0.11294  
504 -> 526 -0.12358  
504 -> 527 0.28945

**Excited State 136: Singlet-EU 5.3081 eV 233.58 nm f=0.0214  
<S\*\*2>=0.000**

453 -> 510 -0.13547  
454 -> 506 -0.14546  
454 -> 511 0.12863  
456 -> 510 0.13794  
493 -> 509 0.11475  
501 -> 517 0.11369  
501 -> 526 -0.13273  
503 -> 525 0.22088

503 -> 528 -0.18083  
504 -> 517 -0.11291  
504 -> 526 0.28935  
504 -> 527 0.12356  
Excited State 137: Singlet-B2G 5.3312 eV 232.56 nm f=0.0000 <S\*\*2>=0.000  
**Excited State 138: Singlet-A2U 5.3681 eV 230.97 nm f=0.2262**  
**<S\*\*2>=0.000**  
453 -> 512 0.21488  
454 -> 508 -0.27319  
455 -> 507 0.27313  
456 -> 505 0.39305  
465 -> 513 -0.11396  
**Excited State 139: Singlet-EU 5.3704 eV 230.86 nm f=0.0806**  
**<S\*\*2>=0.000**  
473 -> 509 -0.15233  
475 -> 511 -0.16118  
480 -> 510 -0.10545  
493 -> 510 -0.28303  
495 -> 511 -0.32600  
496 -> 509 0.22816  
498 -> 511 -0.13149  
500 -> 509 -0.13795  
504 -> 527 0.14541  
Excited State 140: Singlet-EG 5.3968 eV 229.74 nm f=0.0000 <S\*\*2>=0.000

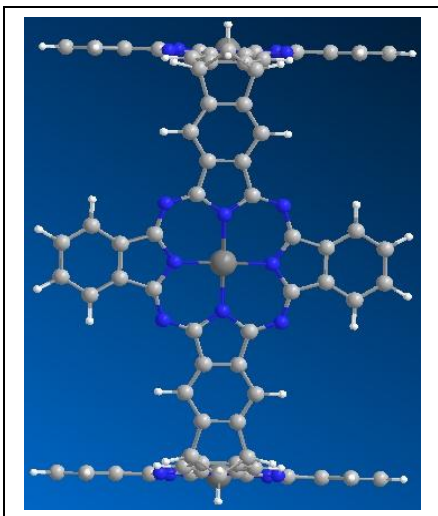

Excited State 1: Singlet-A2G 1.8163 eV 682.64 nm f=0.0000  $\langle S^{*2} \rangle = 0.000$

**Excited State 2: Singlet-EU 1.9578 eV 633.30 nm f=1.1376  $\langle S^{*2} \rangle = 0.000$**

616 -> 630 0.10517  
621 -> 627 -0.32659  
623 -> 625 0.34818  
623 -> 632 0.32248  
624 -> 627 0.34375

**Excited State 3: Singlet-EU 1.9578 eV 633.30 nm f=1.1376  $\langle S^{*2} \rangle = 0.000$**

616 -> 629 0.10517  
621 -> 626 0.32659  
622 -> 625 0.34818  
622 -> 632 -0.32248  
624 -> 626 0.34375

Excited State 4: Singlet-B2U 1.9881 eV 623.63 nm f=0.0000  $\langle S^{*2} \rangle = 0.000$

Excited State 5: Singlet-EG 2.0048 eV 618.43 nm f=0.0000  $\langle S^{*2} \rangle = 0.000$

Excited State 6: Singlet-EG 2.0048 eV 618.43 nm f=0.0000  $\langle S^{*2} \rangle = 0.000$

Excited State 7: Singlet-B2G 2.0364 eV 608.84 nm f=0.0000  $\langle S^{*2} \rangle = 0.000$

**Excited State 8: Singlet-A2U 2.0402 eV 607.70 nm f=1.5331**  
 **$\langle S^{*2} \rangle = 0.000$**

616 -> 625 -0.11594  
621 -> 628 -0.33053  
622 -> 629 0.33350  
623 -> 630 0.33350  
624 -> 631 0.33665

Excited State 9: Singlet-B2U 3.6420 eV 340.43 nm f=0.0000  $\langle S^{*2} \rangle = 0.000$

Excited State 10: Singlet-EG 3.6420 eV 340.43 nm f=0.0000  $\langle S^{*2} \rangle = 0.000$

Excited State 11: Singlet-EG 3.6420 eV 340.43 nm f=0.0000  $\langle S^{*2} \rangle = 0.000$

**Excited State 12: Singlet-A2U 3.6421 eV 340.42 nm f=0.0121**  
 **$\langle S^{*2} \rangle = 0.000$**

602 -> 625 0.23100  
605 -> 626 0.23915  
606 -> 627 0.23916

|                                                                          |                   |                  |                  |                 |  |
|--------------------------------------------------------------------------|-------------------|------------------|------------------|-----------------|--|
| 608 -> 632                                                               | 0.33729           |                  |                  |                 |  |
| 610 -> 626                                                               | 0.24558           |                  |                  |                 |  |
| 611 -> 627                                                               | -0.24559          |                  |                  |                 |  |
| 612 -> 625                                                               | -0.25891          |                  |                  |                 |  |
| Excited State 13: Singlet-A2G 3.6963 eV 335.43 nm f=0.0000 <S**2>=0.000  |                   |                  |                  |                 |  |
| <b>Excited State 14:</b>                                                 | <b>Singlet-EU</b> | <b>3.6972 eV</b> | <b>335.34 nm</b> | <b>f=0.0113</b> |  |
| <b>&lt;S**2&gt;=0.000</b>                                                |                   |                  |                  |                 |  |
| 602 -> 630                                                               | 0.21206           |                  |                  |                 |  |
| 605 -> 628                                                               | 0.10282           |                  |                  |                 |  |
| 605 -> 631                                                               | -0.10122          |                  |                  |                 |  |
| 606 -> 628                                                               | 0.22318           |                  |                  |                 |  |
| 606 -> 631                                                               | 0.21971           |                  |                  |                 |  |
| 608 -> 629                                                               | 0.14296           |                  |                  |                 |  |
| 608 -> 630                                                               | 0.31030           |                  |                  |                 |  |
| 610 -> 628                                                               | 0.10120           |                  |                  |                 |  |
| 611 -> 628                                                               | -0.21966          |                  |                  |                 |  |
| 611 -> 631                                                               | -0.21580          |                  |                  |                 |  |
| 612 -> 629                                                               | 0.10360           |                  |                  |                 |  |
| 612 -> 630                                                               | -0.22487          |                  |                  |                 |  |
| <b>Excited State 15:</b>                                                 | <b>Singlet-EU</b> | <b>3.6972 eV</b> | <b>335.34 nm</b> | <b>f=0.0113</b> |  |
| <b>&lt;S**2&gt;=0.000</b>                                                |                   |                  |                  |                 |  |
| 602 -> 629                                                               | -0.21206          |                  |                  |                 |  |
| 605 -> 628                                                               | 0.22318           |                  |                  |                 |  |
| 605 -> 631                                                               | -0.21971          |                  |                  |                 |  |
| 606 -> 628                                                               | -0.10282          |                  |                  |                 |  |
| 606 -> 631                                                               | -0.10122          |                  |                  |                 |  |
| 608 -> 629                                                               | 0.31030           |                  |                  |                 |  |
| 608 -> 630                                                               | -0.14296          |                  |                  |                 |  |
| 610 -> 628                                                               | 0.21966           |                  |                  |                 |  |
| 610 -> 631                                                               | -0.21580          |                  |                  |                 |  |
| 611 -> 628                                                               | 0.10120           |                  |                  |                 |  |
| 612 -> 629                                                               | 0.22487           |                  |                  |                 |  |
| 612 -> 630                                                               | 0.10360           |                  |                  |                 |  |
| Excited State 16: Singlet-B2G 3.6976 eV 335.31 nm f=0.0000 <S**2>=0.000  |                   |                  |                  |                 |  |
| Excited State 17: Singlet-A2G 3.8878 eV 318.90 nm f=0.0000 <S**2>=0.000  |                   |                  |                  |                 |  |
| Excited State 18: Singlet-?Sym 3.8979 eV 318.08 nm f=0.0000 <S**2>=0.000 |                   |                  |                  |                 |  |
| <b>Excited State 19:</b>                                                 | <b>Singlet-EU</b> | <b>3.8982 eV</b> | <b>318.06 nm</b> | <b>f=0.0427</b> |  |
| <b>&lt;S**2&gt;=0.000</b>                                                |                   |                  |                  |                 |  |
| 621 -> 626                                                               | -0.43785          |                  |                  |                 |  |
| 621 -> 627                                                               | 0.11312           |                  |                  |                 |  |
| 624 -> 626                                                               | 0.50113           |                  |                  |                 |  |
| 624 -> 627                                                               | 0.12947           |                  |                  |                 |  |
| <b>Excited State 20:</b>                                                 | <b>Singlet-EU</b> | <b>3.8982 eV</b> | <b>318.06 nm</b> | <b>f=0.0427</b> |  |
| <b>&lt;S**2&gt;=0.000</b>                                                |                   |                  |                  |                 |  |
| 621 -> 626                                                               | 0.11312           |                  |                  |                 |  |
| 621 -> 627                                                               | 0.43785           |                  |                  |                 |  |

|                           |              |                    |                  |                  |                 |
|---------------------------|--------------|--------------------|------------------|------------------|-----------------|
| 624 -> 626                | -0.12947     |                    |                  |                  |                 |
| 624 -> 627                | 0.50113      |                    |                  |                  |                 |
| <b>Excited State</b>      | <b>21:</b>   | <b>Singlet-EU</b>  | <b>3.9039 eV</b> | <b>317.59 nm</b> | <b>f=0.0584</b> |
| <b>&lt;S**2&gt;=0.000</b> |              |                    |                  |                  |                 |
| 622 -> 625                | 0.41549      |                    |                  |                  |                 |
| 622 -> 632                | 0.35531      |                    |                  |                  |                 |
| 623 -> 625                | -0.32068     |                    |                  |                  |                 |
| 623 -> 632                | 0.27424      |                    |                  |                  |                 |
| <b>Excited State</b>      | <b>22:</b>   | <b>Singlet-EU</b>  | <b>3.9039 eV</b> | <b>317.59 nm</b> | <b>f=0.0584</b> |
| <b>&lt;S**2&gt;=0.000</b> |              |                    |                  |                  |                 |
| 622 -> 625                | 0.32068      |                    |                  |                  |                 |
| 622 -> 632                | 0.27424      |                    |                  |                  |                 |
| 623 -> 625                | 0.41549      |                    |                  |                  |                 |
| 623 -> 632                | -0.35531     |                    |                  |                  |                 |
| Excited State 23:         | Singlet-?Sym | 3.9048 eV          | 317.52 nm        | f=0.0000         | <S**2>=0.000    |
| Excited State 24:         | Singlet-B2G  | 3.9114 eV          | 316.98 nm        | f=0.0000         | <S**2>=0.000    |
| Excited State 25:         | Singlet-A1U  | 3.9719 eV          | 312.15 nm        | f=0.0000         | <S**2>=0.000    |
| Excited State 26:         | Singlet-EG   | 3.9918 eV          | 310.59 nm        | f=0.0000         | <S**2>=0.000    |
| Excited State 27:         | Singlet-EG   | 3.9918 eV          | 310.59 nm        | f=0.0000         | <S**2>=0.000    |
| Excited State 28:         | Singlet-B2U  | 4.0101 eV          | 309.18 nm        | f=0.0000         | <S**2>=0.000    |
| Excited State 29:         | Singlet-EG   | 4.0163 eV          | 308.71 nm        | f=0.0000         | <S**2>=0.000    |
| Excited State 30:         | Singlet-EG   | 4.0163 eV          | 308.71 nm        | f=0.0000         | <S**2>=0.000    |
| Excited State 31:         | Singlet-?Sym | 4.0177 eV          | 308.60 nm        | f=0.0000         | <S**2>=0.000    |
| <b>Excited State</b>      | <b>32:</b>   | <b>Singlet-A2U</b> | <b>4.0192 eV</b> | <b>308.48 nm</b> | <b>f=0.0001</b> |
| <b>&lt;S**2&gt;=0.000</b> |              |                    |                  |                  |                 |
| 621 -> 628                | 0.48345      |                    |                  |                  |                 |
| 624 -> 631                | 0.51188      |                    |                  |                  |                 |
| Excited State 33:         | Singlet-?Sym | 4.0207 eV          | 308.37 nm        | f=0.0000         | <S**2>=0.000    |
| Excited State 34:         | Singlet-EG   | 4.0221 eV          | 308.25 nm        | f=0.0000         | <S**2>=0.000    |
| Excited State 35:         | Singlet-EG   | 4.0221 eV          | 308.25 nm        | f=0.0000         | <S**2>=0.000    |
| Excited State 36:         | Singlet-B2U  | 4.0447 eV          | 306.53 nm        | f=0.0000         | <S**2>=0.000    |
| Excited State 37:         | Singlet-B1U  | 4.0568 eV          | 305.62 nm        | f=0.0000         | <S**2>=0.000    |
| Excited State 38:         | Singlet-A2G  | 4.0865 eV          | 303.40 nm        | f=0.0000         | <S**2>=0.000    |
| Excited State 39:         | Singlet-EG   | 4.0990 eV          | 302.48 nm        | f=0.0000         | <S**2>=0.000    |
| Excited State 40:         | Singlet-EG   | 4.0990 eV          | 302.48 nm        | f=0.0000         | <S**2>=0.000    |
| <b>Excited State</b>      | <b>41:</b>   | <b>Singlet-A2U</b> | <b>4.1199 eV</b> | <b>300.94 nm</b> | <b>f=0.2496</b> |
| <b>&lt;S**2&gt;=0.000</b> |              |                    |                  |                  |                 |
| 588 -> 625                | 0.16158      |                    |                  |                  |                 |
| 590 -> 627                | 0.11761      |                    |                  |                  |                 |
| 591 -> 626                | 0.11761      |                    |                  |                  |                 |
| 602 -> 625                | -0.15406     |                    |                  |                  |                 |
| 605 -> 626                | -0.12416     |                    |                  |                  |                 |
| 606 -> 627                | -0.12416     |                    |                  |                  |                 |
| 610 -> 626                | 0.13486      |                    |                  |                  |                 |
| 611 -> 627                | -0.13486     |                    |                  |                  |                 |
| 612 -> 625                | -0.17932     |                    |                  |                  |                 |

|                           |          |                   |                  |                  |                       |
|---------------------------|----------|-------------------|------------------|------------------|-----------------------|
| 613 -> 632                | 0.26600  |                   |                  |                  |                       |
| 614 -> 626                | -0.17769 |                   |                  |                  |                       |
| 615 -> 627                | -0.17769 |                   |                  |                  |                       |
| 617 -> 636                | -0.10004 |                   |                  |                  |                       |
| 618 -> 627                | 0.16753  |                   |                  |                  |                       |
| 619 -> 626                | 0.16753  |                   |                  |                  |                       |
| 620 -> 632                | 0.22913  |                   |                  |                  |                       |
| <b>Excited State 42:</b>  |          | <b>Singlet-EU</b> | <b>4.1914 eV</b> | <b>295.81 nm</b> | <b>f=0.5324</b>       |
| <b>&lt;S**2&gt;=0.000</b> |          |                   |                  |                  |                       |
| 581 -> 626                | -0.20218 |                   |                  |                  |                       |
| 581 -> 627                | -0.16972 |                   |                  |                  |                       |
| 582 -> 625                | -0.21867 |                   |                  |                  |                       |
| 582 -> 632                | 0.20680  |                   |                  |                  |                       |
| 583 -> 625                | -0.18356 |                   |                  |                  |                       |
| 583 -> 632                | -0.17359 |                   |                  |                  |                       |
| 584 -> 626                | 0.22110  |                   |                  |                  |                       |
| 584 -> 627                | -0.18560 |                   |                  |                  |                       |
| <b>Excited State 43:</b>  |          | <b>Singlet-EU</b> | <b>4.1914 eV</b> | <b>295.81 nm</b> | <b>f=0.5324</b>       |
| <b>&lt;S**2&gt;=0.000</b> |          |                   |                  |                  |                       |
| 581 -> 626                | -0.16972 |                   |                  |                  |                       |
| 581 -> 627                | 0.20218  |                   |                  |                  |                       |
| 582 -> 625                | -0.18356 |                   |                  |                  |                       |
| 582 -> 632                | 0.17359  |                   |                  |                  |                       |
| 583 -> 625                | 0.21867  |                   |                  |                  |                       |
| 583 -> 632                | 0.20680  |                   |                  |                  |                       |
| 584 -> 626                | 0.18560  |                   |                  |                  |                       |
| 584 -> 627                | 0.22110  |                   |                  |                  |                       |
| Excited State 44:         |          | Singlet-B2G       | 4.1946 eV        | 295.58 nm        | f=0.0000 <S**2>=0.000 |
| Excited State 45:         |          | Singlet-A2G       | 4.1947 eV        | 295.57 nm        | f=0.0000 <S**2>=0.000 |
| <b>Excited State 46:</b>  |          | <b>Singlet-EU</b> | <b>4.2070 eV</b> | <b>294.71 nm</b> | <b>f=1.8630</b>       |
| <b>&lt;S**2&gt;=0.000</b> |          |                   |                  |                  |                       |
| 581 -> 626                | -0.12190 |                   |                  |                  |                       |
| 581 -> 627                | -0.10090 |                   |                  |                  |                       |
| 582 -> 625                | -0.12188 |                   |                  |                  |                       |
| 582 -> 632                | 0.12622  |                   |                  |                  |                       |
| 583 -> 625                | -0.10088 |                   |                  |                  |                       |
| 583 -> 632                | -0.10448 |                   |                  |                  |                       |
| 584 -> 626                | 0.12312  |                   |                  |                  |                       |
| 584 -> 627                | -0.10191 |                   |                  |                  |                       |
| 591 -> 628                | 0.11078  |                   |                  |                  |                       |
| 594 -> 629                | 0.12850  |                   |                  |                  |                       |
| 594 -> 630                | 0.10636  |                   |                  |                  |                       |
| 614 -> 628                | -0.10293 |                   |                  |                  |                       |
| 614 -> 631                | 0.10176  |                   |                  |                  |                       |
| 616 -> 629                | 0.15557  |                   |                  |                  |                       |
| 616 -> 630                | -0.12877 |                   |                  |                  |                       |

|                           |                    |                  |                  |                 |              |
|---------------------------|--------------------|------------------|------------------|-----------------|--------------|
| 618 -> 628                | -0.10800           |                  |                  |                 |              |
| 619 -> 628                | -0.13047           |                  |                  |                 |              |
| 619 -> 631                | 0.11918            |                  |                  |                 |              |
| 620 -> 629                | -0.15312           |                  |                  |                 |              |
| 620 -> 630                | -0.12674           |                  |                  |                 |              |
| 621 -> 626                | -0.10936           |                  |                  |                 |              |
| <b>Excited State 47:</b>  | <b>Singlet-EU</b>  | <b>4.2070 eV</b> | <b>294.71 nm</b> | <b>f=1.8630</b> |              |
| <b>&lt;S**2&gt;=0.000</b> |                    |                  |                  |                 |              |
| 581 -> 626                | -0.10090           |                  |                  |                 |              |
| 581 -> 627                | 0.12190            |                  |                  |                 |              |
| 582 -> 625                | -0.10088           |                  |                  |                 |              |
| 582 -> 632                | 0.10448            |                  |                  |                 |              |
| 583 -> 625                | 0.12188            |                  |                  |                 |              |
| 583 -> 632                | 0.12622            |                  |                  |                 |              |
| 584 -> 626                | 0.10191            |                  |                  |                 |              |
| 584 -> 627                | 0.12312            |                  |                  |                 |              |
| 590 -> 628                | -0.11078           |                  |                  |                 |              |
| 594 -> 629                | 0.10636            |                  |                  |                 |              |
| 594 -> 630                | -0.12850           |                  |                  |                 |              |
| 615 -> 628                | 0.10293            |                  |                  |                 |              |
| 615 -> 631                | 0.10176            |                  |                  |                 |              |
| 616 -> 629                | 0.12877            |                  |                  |                 |              |
| 616 -> 630                | 0.15557            |                  |                  |                 |              |
| 618 -> 628                | 0.13047            |                  |                  |                 |              |
| 618 -> 631                | 0.11918            |                  |                  |                 |              |
| 619 -> 628                | -0.10800           |                  |                  |                 |              |
| 620 -> 629                | -0.12674           |                  |                  |                 |              |
| 620 -> 630                | 0.15312            |                  |                  |                 |              |
| 621 -> 627                | 0.10936            |                  |                  |                 |              |
| Excited State 48:         | Singlet-B2U        | 4.2267 eV        | 293.34 nm        | f=0.0000        | <S**2>=0.000 |
| Excited State 49:         | Singlet-EG         | 4.2277 eV        | 293.27 nm        | f=0.0000        | <S**2>=0.000 |
| Excited State 50:         | Singlet-EG         | 4.2277 eV        | 293.27 nm        | f=0.0000        | <S**2>=0.000 |
| <b>Excited State 51:</b>  | <b>Singlet-A2U</b> | <b>4.2283 eV</b> | <b>293.23 nm</b> | <b>f=0.0003</b> |              |
| <b>&lt;S**2&gt;=0.000</b> |                    |                  |                  |                 |              |
| 581 -> 628                | 0.30853            |                  |                  |                 |              |
| 582 -> 629                | -0.31959           |                  |                  |                 |              |
| 583 -> 630                | 0.31959            |                  |                  |                 |              |
| 584 -> 631                | 0.32661            |                  |                  |                 |              |
| 585 -> 628                | -0.12570           |                  |                  |                 |              |
| Excited State 52:         | Singlet-B2U        | 4.2856 eV        | 289.31 nm        | f=0.0000        | <S**2>=0.000 |
| Excited State 53:         | Singlet-B2G        | 4.2974 eV        | 288.51 nm        | f=0.0000        | <S**2>=0.000 |
| Excited State 54:         | Singlet-B1G        | 4.3104 eV        | 287.64 nm        | f=0.0000        | <S**2>=0.000 |
| Excited State 55:         | Singlet-EG         | 4.3173 eV        | 287.18 nm        | f=0.0000        | <S**2>=0.000 |
| Excited State 56:         | Singlet-EG         | 4.3173 eV        | 287.18 nm        | f=0.0000        | <S**2>=0.000 |
| Excited State 57:         | Singlet-B2G        | 4.3287 eV        | 286.42 nm        | f=0.0000        | <S**2>=0.000 |



**Excited State 58: Singlet-EU 4.3360 eV 285.94 nm f=0.0006**  
**<S\*\*2>=0.000**

621 -> 626 0.34209  
621 -> 627 0.16898  
622 -> 625 -0.25691  
622 -> 632 0.36294  
623 -> 625 0.12690  
623 -> 632 0.17928  
624 -> 626 0.28770  
624 -> 627 -0.14211

**Excited State 59: Singlet-EU 4.3360 eV 285.94 nm f=0.0006**  
**<S\*\*2>=0.000**

621 -> 626 -0.16898  
621 -> 627 0.34209  
622 -> 625 0.12690  
622 -> 632 -0.17928  
623 -> 625 0.25691  
623 -> 632 0.36294  
624 -> 626 -0.14211  
624 -> 627 -0.28770

Excited State 60: Singlet-A2G 4.3436 eV 285.44 nm f=0.0000 <S\*\*2>=0.000

Excited State 61: Singlet-A1U 4.3544 eV 284.74 nm f=0.0000 <S\*\*2>=0.000

Excited State 62: Singlet-EG 4.3547 eV 284.71 nm f=0.0000 <S\*\*2>=0.000

Excited State 63: Singlet-EG 4.3547 eV 284.71 nm f=0.0000 <S\*\*2>=0.000

Excited State 64: Singlet-B1U 4.3548 eV 284.71 nm f=0.0000 <S\*\*2>=0.000

**Excited State 65: Singlet-EU 4.3580 eV 284.49 nm f=0.0281**  
**<S\*\*2>=0.000**

595 -> 628 0.10588  
604 -> 625 0.10313  
607 -> 626 -0.11469  
618 -> 628 -0.10131  
621 -> 635 -0.22607  
622 -> 633 0.24552  
622 -> 636 -0.22395  
623 -> 633 -0.10367  
624 -> 634 -0.10210  
624 -> 635 -0.24180

**Excited State 66: Singlet-EU 4.3580 eV 284.49 nm f=0.0281**  
**<S\*\*2>=0.000**

596 -> 628 -0.10588  
603 -> 625 -0.10313  
607 -> 627 -0.11469  
619 -> 628 0.10131  
621 -> 634 -0.22607  
622 -> 633 0.10367  
623 -> 633 0.24552

|                           |             |                    |                  |                  |                 |  |
|---------------------------|-------------|--------------------|------------------|------------------|-----------------|--|
| 623 -> 636                | 0.22395     |                    |                  |                  |                 |  |
| 624 -> 634                | 0.24180     |                    |                  |                  |                 |  |
| 624 -> 635                | -0.10210    |                    |                  |                  |                 |  |
| <b>Excited State</b>      | <b>67:</b>  | <b>Singlet-A2U</b> | <b>4.3735 eV</b> | <b>283.49 nm</b> | <b>f=4.1933</b> |  |
| <b>&lt;S**2&gt;=0.000</b> |             |                    |                  |                  |                 |  |
| 613 -> 632                | -0.15576    |                    |                  |                  |                 |  |
| 614 -> 626                | 0.21095     |                    |                  |                  |                 |  |
| 615 -> 627                | 0.21095     |                    |                  |                  |                 |  |
| 616 -> 625                | 0.30732     |                    |                  |                  |                 |  |
| 618 -> 627                | 0.23191     |                    |                  |                  |                 |  |
| 619 -> 626                | 0.23191     |                    |                  |                  |                 |  |
| 620 -> 632                | 0.27711     |                    |                  |                  |                 |  |
| 621 -> 628                | -0.10967    |                    |                  |                  |                 |  |
| 622 -> 629                | 0.12498     |                    |                  |                  |                 |  |
| 623 -> 630                | 0.12498     |                    |                  |                  |                 |  |
| 624 -> 631                | 0.10550     |                    |                  |                  |                 |  |
| <b>Excited State</b>      | <b>68:</b>  | <b>Singlet-A2U</b> | <b>4.3803 eV</b> | <b>283.05 nm</b> | <b>f=0.0026</b> |  |
| <b>&lt;S**2&gt;=0.000</b> |             |                    |                  |                  |                 |  |
| 621 -> 628                | 0.37909     |                    |                  |                  |                 |  |
| 622 -> 629                | 0.35022     |                    |                  |                  |                 |  |
| 623 -> 630                | 0.35022     |                    |                  |                  |                 |  |
| 624 -> 631                | -0.33271    |                    |                  |                  |                 |  |
| Excited State 69:         | Singlet-EG  | 4.3830 eV          | 282.88 nm        | f=0.0000         | <S**2>=0.000    |  |
| Excited State 70:         | Singlet-EG  | 4.3830 eV          | 282.88 nm        | f=0.0000         | <S**2>=0.000    |  |
| Excited State 71:         | Singlet-A1G | 4.3848 eV          | 282.76 nm        | f=0.0000         | <S**2>=0.000    |  |
| Excited State 72:         | Singlet-B2U | 4.3856 eV          | 282.70 nm        | f=0.0000         | <S**2>=0.000    |  |
| Excited State 73:         | Singlet-A2G | 4.5043 eV          | 275.26 nm        | f=0.0000         | <S**2>=0.000    |  |
| <b>Excited State</b>      | <b>74:</b>  | <b>Singlet-EU</b>  | <b>4.5352 eV</b> | <b>273.38 nm</b> | <b>f=0.9745</b> |  |
| <b>&lt;S**2&gt;=0.000</b> |             |                    |                  |                  |                 |  |
| 594 -> 629                | -0.11914    |                    |                  |                  |                 |  |
| 594 -> 630                | -0.11515    |                    |                  |                  |                 |  |
| 602 -> 629                | 0.13556     |                    |                  |                  |                 |  |
| 602 -> 630                | -0.13102    |                    |                  |                  |                 |  |
| 605 -> 628                | -0.11696    |                    |                  |                  |                 |  |
| 606 -> 628                | -0.11304    |                    |                  |                  |                 |  |
| 612 -> 629                | 0.10065     |                    |                  |                  |                 |  |
| 613 -> 629                | 0.19037     |                    |                  |                  |                 |  |
| 613 -> 630                | 0.18399     |                    |                  |                  |                 |  |
| 614 -> 628                | -0.14735    |                    |                  |                  |                 |  |
| 614 -> 631                | 0.17090     |                    |                  |                  |                 |  |
| 615 -> 628                | -0.14241    |                    |                  |                  |                 |  |
| 615 -> 631                | -0.16517    |                    |                  |                  |                 |  |
| 616 -> 629                | 0.13467     |                    |                  |                  |                 |  |
| 616 -> 630                | -0.13016    |                    |                  |                  |                 |  |
| <b>Excited State</b>      | <b>75:</b>  | <b>Singlet-EU</b>  | <b>4.5352 eV</b> | <b>273.38 nm</b> | <b>f=0.9746</b> |  |
| <b>&lt;S**2&gt;=0.000</b> |             |                    |                  |                  |                 |  |

594 -> 629 0.11515  
594 -> 630 -0.11914  
602 -> 629 -0.13102  
602 -> 630 -0.13556  
605 -> 628 0.11304  
606 -> 628 -0.11696  
612 -> 630 -0.10065  
613 -> 629 -0.18399  
613 -> 630 0.19037  
614 -> 628 0.14241  
614 -> 631 -0.16517  
615 -> 628 -0.14735  
615 -> 631 -0.17090  
616 -> 629 -0.13016  
616 -> 630 -0.13467

Excited State 76: Singlet-B2G 4.5621 eV 271.77 nm f=0.0000 <S\*\*2>=0.000

Excited State 77: Singlet-B1G 4.6057 eV 269.20 nm f=0.0000 <S\*\*2>=0.000

**Excited State 78: Singlet-EU 4.6068 eV 269.13 nm f=0.0128**  
**<S\*\*2>=0.000**

569 -> 625 -0.12184  
569 -> 632 -0.11567  
570 -> 625 -0.13319  
570 -> 632 0.12645  
572 -> 626 -0.17359  
572 -> 627 -0.15879  
573 -> 629 0.14674  
573 -> 630 -0.13423  
574 -> 628 0.14718  
574 -> 631 -0.14761  
575 -> 628 -0.13464  
575 -> 631 -0.13503  
576 -> 629 -0.14812  
576 -> 630 -0.13549  
577 -> 626 0.17395  
577 -> 627 -0.15913  
578 -> 625 -0.10812  
578 -> 632 -0.10372  
579 -> 625 -0.11819  
579 -> 632 0.11338

**Excited State 79: Singlet-EU 4.6068 eV 269.13 nm f=0.0128**  
**<S\*\*2>=0.000**

569 -> 625 0.13319  
569 -> 632 0.12645  
570 -> 625 -0.12184  
570 -> 632 0.11567  
572 -> 626 -0.15879

572 -> 627 0.17359  
 573 -> 629 0.13423  
 573 -> 630 0.14674  
 574 -> 628 0.13464  
 574 -> 631 -0.13503  
 575 -> 628 0.14719  
 575 -> 631 0.14761  
 576 -> 629 -0.13549  
 576 -> 630 0.14812  
 577 -> 626 0.15913  
 577 -> 627 0.17395  
 578 -> 625 0.11819  
 578 -> 632 0.11338  
 579 -> 625 -0.10812  
 579 -> 632 0.10372  
**Excited State 80:** Singlet-A1G 4.6083 eV 269.04 nm f=0.0000 <S\*\*2>=0.000  
**Excited State 81:** Singlet-B1U 4.6733 eV 265.30 nm f=0.0000 <S\*\*2>=0.000  
**Excited State 82:** Singlet-EG 4.6733 eV 265.30 nm f=0.0000 <S\*\*2>=0.000  
**Excited State 83:** Singlet-EG 4.6733 eV 265.30 nm f=0.0000 <S\*\*2>=0.000  
**Excited State 84:** Singlet-A1U 4.6733 eV 265.30 nm f=0.0000 <S\*\*2>=0.000  
**Excited State 85:** Singlet-B1G 4.7081 eV 263.34 nm f=0.0000 <S\*\*2>=0.000  
**Excited State 86:** Singlet-EU 4.7306 eV 262.09 nm f=0.1519  
 <S\*\*2>=0.000  
 591 -> 631 0.11573  
 614 -> 628 0.11349  
 617 -> 629 0.15253  
 617 -> 630 0.19613  
 618 -> 628 -0.14913  
 619 -> 628 -0.19176  
**Excited State 87:** Singlet-EU 4.7306 eV 262.09 nm f=0.1519  
 <S\*\*2>=0.000  
 590 -> 631 -0.11573  
 615 -> 628 0.11349  
 617 -> 629 0.19613  
 617 -> 630 -0.15253  
 618 -> 628 -0.19176  
 619 -> 628 0.14913  
**Excited State 88:** Singlet-A1U 4.7465 eV 261.21 nm f=0.0000 <S\*\*2>=0.000  
**Excited State 89:** Singlet-EG 4.7466 eV 261.21 nm f=0.0000 <S\*\*2>=0.000  
**Excited State 90:** Singlet-EG 4.7466 eV 261.21 nm f=0.0000 <S\*\*2>=0.000  
**Excited State 91:** Singlet-B1U 4.7467 eV 261.20 nm f=0.0000 <S\*\*2>=0.000  
**Excited State 92:** Singlet-A2G 4.7595 eV 260.50 nm f=0.0000 <S\*\*2>=0.000  
**Excited State 93:** Singlet-A1G 4.7886 eV 258.92 nm f=0.0000 <S\*\*2>=0.000  
**Excited State 94:** Singlet-EU 4.7936 eV 258.65 nm f=0.0141  
 <S\*\*2>=0.000  
 569 -> 625 -0.12360

|                           |          |                   |                  |                  |                       |
|---------------------------|----------|-------------------|------------------|------------------|-----------------------|
| 569 -> 632                | -0.13030 |                   |                  |                  |                       |
| 572 -> 626                | -0.13005 |                   |                  |                  |                       |
| 572 -> 627                | -0.16988 |                   |                  |                  |                       |
| 573 -> 629                | -0.15103 |                   |                  |                  |                       |
| 573 -> 630                | 0.19729  |                   |                  |                  |                       |
| 574 -> 628                | -0.15204 |                   |                  |                  |                       |
| 574 -> 631                | 0.15026  |                   |                  |                  |                       |
| 575 -> 628                | 0.19861  |                   |                  |                  |                       |
| 575 -> 631                | 0.19628  |                   |                  |                  |                       |
| 576 -> 629                | 0.15135  |                   |                  |                  |                       |
| 576 -> 630                | 0.19771  |                   |                  |                  |                       |
| 577 -> 626                | 0.13215  |                   |                  |                  |                       |
| 577 -> 627                | -0.17263 |                   |                  |                  |                       |
| 578 -> 625                | -0.12150 |                   |                  |                  |                       |
| 578 -> 632                | -0.10936 |                   |                  |                  |                       |
| <b>Excited State 95:</b>  |          | <b>Singlet-EU</b> | <b>4.7936 eV</b> | <b>258.65 nm</b> | <b>f=0.0141</b>       |
| <b>&lt;S**2&gt;=0.000</b> |          |                   |                  |                  |                       |
| 570 -> 625                | 0.12360  |                   |                  |                  |                       |
| 570 -> 632                | -0.13030 |                   |                  |                  |                       |
| 572 -> 626                | 0.16988  |                   |                  |                  |                       |
| 572 -> 627                | -0.13005 |                   |                  |                  |                       |
| 573 -> 629                | 0.19729  |                   |                  |                  |                       |
| 573 -> 630                | 0.15103  |                   |                  |                  |                       |
| 574 -> 628                | 0.19861  |                   |                  |                  |                       |
| 574 -> 631                | -0.19628 |                   |                  |                  |                       |
| 575 -> 628                | 0.15204  |                   |                  |                  |                       |
| 575 -> 631                | 0.15026  |                   |                  |                  |                       |
| 576 -> 629                | -0.19771 |                   |                  |                  |                       |
| 576 -> 630                | 0.15135  |                   |                  |                  |                       |
| 577 -> 626                | -0.17263 |                   |                  |                  |                       |
| 577 -> 627                | -0.13215 |                   |                  |                  |                       |
| 579 -> 625                | 0.12150  |                   |                  |                  |                       |
| 579 -> 632                | -0.10936 |                   |                  |                  |                       |
| Excited State 96:         |          | Singlet-B1G       | 4.7940 eV        | 258.62 nm        | f=0.0000 <S**2>=0.000 |
| Excited State 97:         |          | Singlet-A1G       | 4.8067 eV        | 257.94 nm        | f=0.0000 <S**2>=0.000 |
| <b>Excited State 98:</b>  |          | <b>Singlet-EU</b> | <b>4.8421 eV</b> | <b>256.05 nm</b> | <b>f=0.3613</b>       |
| <b>&lt;S**2&gt;=0.000</b> |          |                   |                  |                  |                       |
| 588 -> 629                | -0.12088 |                   |                  |                  |                       |
| 588 -> 630                | 0.10649  |                   |                  |                  |                       |
| 590 -> 628                | 0.12224  |                   |                  |                  |                       |
| 591 -> 628                | 0.13877  |                   |                  |                  |                       |
| 594 -> 629                | 0.10121  |                   |                  |                  |                       |
| 596 -> 631                | -0.10111 |                   |                  |                  |                       |
| 598 -> 632                | -0.10194 |                   |                  |                  |                       |
| 618 -> 631                | 0.14070  |                   |                  |                  |                       |
| 619 -> 631                | -0.15972 |                   |                  |                  |                       |

|                           |                    |                  |                  |                 |                           |
|---------------------------|--------------------|------------------|------------------|-----------------|---------------------------|
| 620 -> 629                | 0.16379            |                  |                  |                 |                           |
| 620 -> 630                | 0.14429            |                  |                  |                 |                           |
| <b>Excited State 99:</b>  | <b>Singlet-EU</b>  | <b>4.8421 eV</b> | <b>256.05 nm</b> | <b>f=0.3613</b> |                           |
| <b>&lt;S**2&gt;=0.000</b> |                    |                  |                  |                 |                           |
| 588 -> 629                | 0.10649            |                  |                  |                 |                           |
| 588 -> 630                | 0.12088            |                  |                  |                 |                           |
| 590 -> 628                | 0.13877            |                  |                  |                 |                           |
| 591 -> 628                | -0.12224           |                  |                  |                 |                           |
| 594 -> 630                | 0.10121            |                  |                  |                 |                           |
| 595 -> 631                | 0.10111            |                  |                  |                 |                           |
| 599 -> 632                | 0.10194            |                  |                  |                 |                           |
| 618 -> 631                | 0.15972            |                  |                  |                 |                           |
| 619 -> 631                | 0.14070            |                  |                  |                 |                           |
| 620 -> 629                | -0.14429           |                  |                  |                 |                           |
| 620 -> 630                | 0.16379            |                  |                  |                 |                           |
| <b>Excited State 100:</b> | <b>Singlet-B2G</b> | <b>4.8805 eV</b> | <b>254.04 nm</b> | <b>f=0.0000</b> | <b>&lt;S**2&gt;=0.000</b> |
| <b>Excited State 101:</b> | <b>Singlet-B1G</b> | <b>4.8814 eV</b> | <b>253.99 nm</b> | <b>f=0.0000</b> | <b>&lt;S**2&gt;=0.000</b> |
| <b>Excited State 102:</b> | <b>Singlet-EU</b>  | <b>4.9109 eV</b> | <b>252.46 nm</b> | <b>f=0.0047</b> |                           |
| <b>&lt;S**2&gt;=0.000</b> |                    |                  |                  |                 |                           |
| 593 -> 630                | 0.11037            |                  |                  |                 |                           |
| 595 -> 628                | 0.10961            |                  |                  |                 |                           |
| 596 -> 628                | 0.13424            |                  |                  |                 |                           |
| 596 -> 631                | 0.11592            |                  |                  |                 |                           |
| 597 -> 629                | 0.11078            |                  |                  |                 |                           |
| 597 -> 630                | 0.13567            |                  |                  |                 |                           |
| 598 -> 625                | 0.11365            |                  |                  |                 |                           |
| 600 -> 627                | -0.10374           |                  |                  |                 |                           |
| 609 -> 629                | 0.11505            |                  |                  |                 |                           |
| 609 -> 630                | -0.14090           |                  |                  |                 |                           |
| 617 -> 629                | 0.14000            |                  |                  |                 |                           |
| 617 -> 630                | 0.17146            |                  |                  |                 |                           |
| 618 -> 631                | 0.12093            |                  |                  |                 |                           |
| 619 -> 631                | -0.14811           |                  |                  |                 |                           |
| <b>Excited State 103:</b> | <b>Singlet-EU</b>  | <b>4.9109 eV</b> | <b>252.46 nm</b> | <b>f=0.0047</b> |                           |
| <b>&lt;S**2&gt;=0.000</b> |                    |                  |                  |                 |                           |
| 593 -> 629                | -0.11037           |                  |                  |                 |                           |
| 595 -> 628                | 0.13424            |                  |                  |                 |                           |
| 595 -> 631                | -0.11592           |                  |                  |                 |                           |
| 596 -> 628                | -0.10961           |                  |                  |                 |                           |
| 597 -> 629                | 0.13567            |                  |                  |                 |                           |
| 597 -> 630                | -0.11078           |                  |                  |                 |                           |
| 599 -> 625                | 0.11365            |                  |                  |                 |                           |
| 600 -> 626                | 0.10374            |                  |                  |                 |                           |
| 609 -> 629                | 0.14090            |                  |                  |                 |                           |
| 609 -> 630                | 0.11505            |                  |                  |                 |                           |
| 617 -> 629                | 0.17146            |                  |                  |                 |                           |

617 -> 630 -0.14000  
 618 -> 631 0.14811  
 619 -> 631 0.12093  
 Excited State 104: Singlet-A1U 4.9246 eV 251.77 nm f=0.0000 <S\*\*2>=0.000  
 Excited State 105: Singlet-EG 4.9313 eV 251.42 nm f=0.0000 <S\*\*2>=0.000  
 Excited State 106: Singlet-EG 4.9313 eV 251.42 nm f=0.0000 <S\*\*2>=0.000  
 Excited State 107: Singlet-A1G 4.9338 eV 251.30 nm f=0.0000 <S\*\*2>=0.000  
 Excited State 108: Singlet-B1U 4.9378 eV 251.09 nm f=0.0000 <S\*\*2>=0.000  
 Excited State 109: Singlet-B2U 4.9939 eV 248.27 nm f=0.0000 <S\*\*2>=0.000  
 Excited State 110: Singlet-EG 4.9969 eV 248.12 nm f=0.0000 <S\*\*2>=0.000  
 Excited State 111: Singlet-EG 4.9969 eV 248.12 nm f=0.0000 <S\*\*2>=0.000  
**Excited State 112: Singlet-A2U 5.0017 eV 247.88 nm f=0.2953**  
**<S\*\*2>=0.000**  
 571 -> 628 0.10113  
 580 -> 631 0.11653  
 585 -> 628 0.16633  
 586 -> 630 0.15467  
 587 -> 629 0.15467  
 588 -> 625 -0.13934  
 590 -> 627 -0.14217  
 591 -> 626 -0.14217  
 592 -> 631 0.17049  
 594 -> 632 -0.16525  
 Excited State 113: Singlet-B1G 5.0414 eV 245.93 nm f=0.0000 <S\*\*2>=0.000  
**Excited State 114: Singlet-EU 5.0489 eV 245.57 nm f=0.0117**  
**<S\*\*2>=0.000**  
 589 -> 626 0.10441  
 601 -> 626 -0.14965  
 601 -> 627 -0.12733  
 603 -> 625 -0.16449  
 603 -> 632 -0.14110  
 604 -> 625 -0.19333  
 604 -> 632 0.16584  
 607 -> 626 0.20241  
 607 -> 627 -0.17221  
 617 -> 629 0.12557  
 617 -> 630 0.10684  
 622 -> 633 0.10621  
**Excited State 115: Singlet-EU 5.0489 eV 245.57 nm f=0.0117**  
**<S\*\*2>=0.000**  
 589 -> 627 -0.10441  
 601 -> 626 -0.12733  
 601 -> 627 0.14965  
 603 -> 625 0.19333  
 603 -> 632 0.16584  
 604 -> 625 -0.16449

604 -> 632 0.14110  
 607 -> 626 0.17221  
 607 -> 627 0.20241  
 617 -> 629 0.10684  
 617 -> 630 -0.12557  
 623 -> 633 0.10621  
 Excited State 116: Singlet-A1G 5.0618 eV 244.94 nm f=0.0000 <S\*\*2>=0.000  
 Excited State 117: Singlet-A2G 5.1084 eV 242.71 nm f=0.0000 <S\*\*2>=0.000  
**Excited State 118: Singlet-EU 5.1403 eV 241.20 nm f=0.2360**  
**<S\*\*2>=0.000**  
 585 -> 626 -0.13830  
 585 -> 627 -0.12113  
 586 -> 625 -0.12734  
 586 -> 632 -0.10397  
 587 -> 625 0.14538  
 587 -> 632 -0.11870  
 592 -> 626 0.17074  
 592 -> 627 -0.14954  
 613 -> 629 -0.11586  
 613 -> 630 -0.10148  
 619 -> 631 0.10784  
 620 -> 629 -0.11844  
 620 -> 630 -0.10374  
**Excited State 119: Singlet-EU 5.1403 eV 241.20 nm f=0.2360**  
**<S\*\*2>=0.000**  
 585 -> 626 -0.12113  
 585 -> 627 0.13830  
 586 -> 625 0.14538  
 586 -> 632 0.11870  
 587 -> 625 0.12734  
 587 -> 632 -0.10397  
 592 -> 626 0.14954  
 592 -> 627 0.17074  
 613 -> 629 -0.10148  
 613 -> 630 0.11586  
 618 -> 631 0.10784  
 620 -> 629 -0.10374  
 620 -> 630 0.11844  
 Excited State 120: Singlet-A1U 5.1574 eV 240.40 nm f=0.0000 <S\*\*2>=0.000  
 Excited State 121: Singlet-B2G 5.1682 eV 239.90 nm f=0.0000 <S\*\*2>=0.000  
 Excited State 122: Singlet-EG 5.1715 eV 239.75 nm f=0.0000 <S\*\*2>=0.000  
 Excited State 123: Singlet-EG 5.1715 eV 239.75 nm f=0.0000 <S\*\*2>=0.000  
 Excited State 124: Singlet-B1U 5.1862 eV 239.07 nm f=0.0000 <S\*\*2>=0.000  
 Excited State 125: Singlet-B1G 5.2211 eV 237.47 nm f=0.0000 <S\*\*2>=0.000  
**Excited State 126: Singlet-EU 5.2386 eV 236.67 nm f=0.0010**  
**<S\*\*2>=0.000**



589 -> 627 -0.14054  
593 -> 630 0.16670  
596 -> 628 0.15713  
596 -> 631 0.16467  
597 -> 630 0.17063  
598 -> 625 -0.18716  
598 -> 632 -0.20301  
600 -> 627 0.24470  
601 -> 627 -0.21903  
603 -> 625 -0.17567  
603 -> 632 -0.15326

**Excited State 127: Singlet-EU 5.2386 eV 236.67 nm f=0.0010**

**<S\*\*2>=0.000**

589 -> 626 0.14054  
593 -> 629 0.16670  
595 -> 628 -0.15713  
595 -> 631 0.16467  
597 -> 629 -0.17063  
599 -> 625 0.18716  
599 -> 632 -0.20301  
600 -> 626 0.24470  
601 -> 626 0.21903  
604 -> 625 0.17567  
604 -> 632 -0.15326

Excited State 128: Singlet-A1G 5.2523 eV 236.06 nm f=0.0000 <S\*\*2>=0.000

Excited State 129: Singlet-B2U 5.3212 eV 233.00 nm f=0.0000 <S\*\*2>=0.000

Excited State 130: Singlet-EG 5.3290 eV 232.66 nm f=0.0000 <S\*\*2>=0.000

Excited State 131: Singlet-EG 5.3290 eV 232.66 nm f=0.0000 <S\*\*2>=0.000

**Excited State 132: Singlet-A2U 5.3405 eV 232.16 nm f=1.2179**

**<S\*\*2>=0.000**

585 -> 628 0.16723  
586 -> 630 0.15548  
587 -> 629 0.15548  
588 -> 625 0.21324  
590 -> 627 0.21389  
591 -> 626 0.21389  
592 -> 631 0.17509  
594 -> 632 0.25318  
602 -> 625 0.15685  
605 -> 626 0.10923  
606 -> 627 0.10923

Excited State 133: Singlet-B2U 5.4209 eV 228.71 nm f=0.0000 <S\*\*2>=0.000

**Excited State 134: Singlet-A2U 5.4209 eV 228.71 nm f=0.0231**

**<S\*\*2>=0.000**

565 -> 625 0.30800  
566 -> 627 0.30280

567 -> 626 0.30283  
568 -> 632 0.29836  
574 -> 635 0.10124  
575 -> 634 0.10123  
576 -> 636 0.10453  
Excited State 135: Singlet-EG 5.4210 eV 228.71 nm f=0.0000 <S\*\*2>=0.000  
Excited State 136: Singlet-EG 5.4210 eV 228.71 nm f=0.0000 <S\*\*2>=0.000  
Excited State 137: Singlet-A2G 5.4338 eV 228.17 nm f=0.0000 <S\*\*2>=0.000  
**Excited State 138: Singlet-EU 5.4342 eV 228.16 nm f=0.0001**  
**<S\*\*2>=0.000**  
565 -> 630 0.27772  
566 -> 628 0.27929  
566 -> 631 0.27649  
568 -> 630 0.27838  
**Excited State 139: Singlet-EU 5.4342 eV 228.16 nm f=0.0001**  
**<S\*\*2>=0.000**  
565 -> 629 -0.27772  
567 -> 628 0.27929  
567 -> 631 -0.27649  
568 -> 629 0.27838  
Excited State 140: Singlet-B2U 5.4743 eV 226.48 nm f=0.0000 <S\*\*2>=0.000

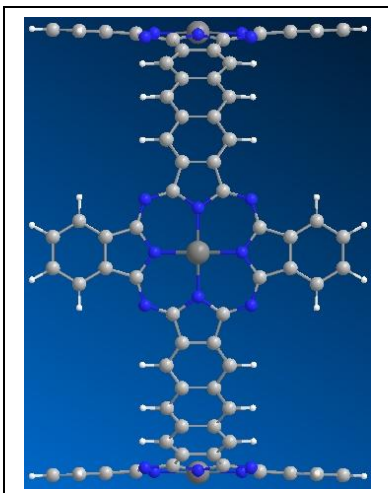

Excited State 1: Singlet-A2G 1.5396 eV 805.31 nm f=0.0000 <S\*\*2>=0.000  
 Excited State 2: Singlet-EG 1.6647 eV 744.79 nm f=0.0000 <S\*\*2>=0.000  
 Excited State 3: Singlet-EG 1.6647 eV 744.79 nm f=0.0000 <S\*\*2>=0.000  
 Excited State 4: Singlet-B2U 1.6701 eV 742.39 nm f=0.0000 <S\*\*2>=0.000

**Excited State 5: Singlet-A2U 1.6760 eV 739.78 nm f=1.5790**

**<S\*\*2>=0.000**

605 -> 613 0.27441

606 -> 611 0.33057

607 -> 612 0.33057

608 -> 609 0.41284

**Excited State 6: Singlet-EU 1.8557 eV 668.13 nm f=1.8313 <S\*\*2>=0.000**

605 -> 614 -0.13388

605 -> 615 -0.24143

606 -> 610 -0.19191

606 -> 616 -0.13072

607 -> 610 0.34607

607 -> 616 -0.23573

608 -> 614 -0.18876

608 -> 615 0.34039

**Excited State 7: Singlet-EU 1.8557 eV 668.13 nm f=1.8313 <S\*\*2>=0.000**

605 -> 614 0.24143

605 -> 615 -0.13388

606 -> 610 0.34607

606 -> 616 0.23573

607 -> 610 0.19191

607 -> 616 -0.13072

608 -> 614 0.34039

608 -> 615 0.18876

Excited State 8: Singlet-B2G 2.0522 eV 604.14 nm f=0.0000 <S\*\*2>=0.000

Excited State 9: Singlet-B1U 3.0176 eV 410.87 nm f=0.0000 <S\*\*2>=0.000

Excited State 10: Singlet-EG 3.0861 eV 401.75 nm f=0.0000 <S\*\*2>=0.000

Excited State 11: Singlet-EG 3.0861 eV 401.75 nm f=0.0000 <S\*\*2>=0.000

**Excited State 12: Singlet-A2U 3.1555 eV 392.91 nm f=0.0474**

**<S\*\*2>=0.000**

601 -> 609 -0.11913  
602 -> 611 -0.11133  
603 -> 612 0.11133  
604 -> 617 0.14326  
605 -> 613 -0.26291  
606 -> 618 -0.21523  
607 -> 619 0.21523  
608 -> 609 0.38121  
608 -> 620 -0.28865

Excited State 13: Singlet-?Sym 3.2788 eV 378.14 nm f=0.0000 <S\*\*2>=0.000

Excited State 14: Singlet-EG 3.2902 eV 376.82 nm f=0.0000 <S\*\*2>=0.000

Excited State 15: Singlet-EG 3.2902 eV 376.82 nm f=0.0000 <S\*\*2>=0.000

Excited State 16: Singlet-?Sym 3.3306 eV 372.25 nm f=0.0000 <S\*\*2>=0.000

Excited State 17: Singlet-B2U 3.3597 eV 369.04 nm f=0.0000 <S\*\*2>=0.000

Excited State 18: Singlet-A2G 3.3910 eV 365.63 nm f=0.0000 <S\*\*2>=0.000

**Excited State 19: Singlet-EU 3.4265 eV 361.84 nm f=0.9049**

**<S\*\*2>=0.000**

601 -> 614 0.11018  
602 -> 610 0.18959  
603 -> 610 0.15389  
604 -> 614 -0.11228  
604 -> 615 0.13832  
605 -> 614 0.21387  
605 -> 615 0.17361  
606 -> 610 -0.14802  
606 -> 616 0.18921  
607 -> 610 0.12015  
607 -> 616 0.15358  
607 -> 621 0.11243  
608 -> 614 -0.18727  
608 -> 615 0.15201  
608 -> 622 0.11362

**Excited State 20: Singlet-EU 3.4265 eV 361.84 nm f=0.9049**

**<S\*\*2>=0.000**

601 -> 615 -0.11018  
602 -> 610 -0.15389  
603 -> 610 0.18959  
604 -> 614 -0.13832  
604 -> 615 -0.11228  
605 -> 614 -0.17361  
605 -> 615 0.21387  
606 -> 610 0.12015  
606 -> 616 -0.15358  
606 -> 621 -0.11243

|                                      |                                           |
|--------------------------------------|-------------------------------------------|
| 607 -> 610                           | 0.14802                                   |
| 607 -> 616                           | 0.18921                                   |
| 608 -> 614                           | 0.15201                                   |
| 608 -> 615                           | 0.18727                                   |
| 608 -> 623                           | 0.11362                                   |
| <b>Excited State 21: Singlet-EU</b>  | <b>3.4761 eV 356.68 nm f=0.0053</b>       |
| <b>&lt;S**2&gt;=0.000</b>            |                                           |
| 604 -> 614                           | -0.12279                                  |
| 605 -> 615                           | -0.14463                                  |
| 607 -> 610                           | 0.44099                                   |
| 607 -> 616                           | 0.20313                                   |
| 608 -> 615                           | -0.43651                                  |
| <b>Excited State 22: Singlet-EU</b>  | <b>3.4761 eV 356.68 nm f=0.0053</b>       |
| <b>&lt;S**2&gt;=0.000</b>            |                                           |
| 604 -> 615                           | -0.12279                                  |
| 605 -> 614                           | 0.14463                                   |
| 606 -> 610                           | 0.44099                                   |
| 606 -> 616                           | -0.20313                                  |
| 608 -> 614                           | -0.43651                                  |
| Excited State 23: Singlet-?Sym       | 3.5359 eV 350.65 nm f=0.0000 <S**2>=0.000 |
| <b>Excited State 24: Singlet-A2U</b> | <b>3.5579 eV 348.47 nm f=0.0105</b>       |
| <b>&lt;S**2&gt;=0.000</b>            |                                           |
| 604 -> 617                           | -0.13766                                  |
| 605 -> 613                           | -0.10782                                  |
| 606 -> 611                           | -0.21935                                  |
| 606 -> 618                           | 0.19326                                   |
| 607 -> 612                           | -0.21935                                  |
| 607 -> 619                           | -0.19326                                  |
| 608 -> 609                           | 0.42043                                   |
| 608 -> 620                           | 0.29069                                   |
| Excited State 25: Singlet-?Sym       | 3.5695 eV 347.35 nm f=0.0000 <S**2>=0.000 |
| Excited State 26: Singlet-EG         | 3.6016 eV 344.25 nm f=0.0000 <S**2>=0.000 |
| Excited State 27: Singlet-EG         | 3.6016 eV 344.25 nm f=0.0000 <S**2>=0.000 |
| Excited State 28: Singlet-B2G        | 3.6562 eV 339.11 nm f=0.0000 <S**2>=0.000 |
| Excited State 29: Singlet-A2G        | 3.6638 eV 338.40 nm f=0.0000 <S**2>=0.000 |
| <b>Excited State 30: Singlet-EU</b>  | <b>3.6748 eV 337.39 nm f=0.0782</b>       |
| <b>&lt;S**2&gt;=0.000</b>            |                                           |
| 577 -> 611                           | 0.15255                                   |
| 578 -> 609                           | 0.18737                                   |
| 578 -> 613                           | 0.17613                                   |
| 580 -> 611                           | 0.22583                                   |
| 585 -> 611                           | 0.23914                                   |
| 587 -> 609                           | 0.20854                                   |
| 587 -> 613                           | 0.20304                                   |
| 588 -> 611                           | -0.17174                                  |
| 593 -> 611                           | -0.10242                                  |

595 -> 613 -0.10570  
597 -> 611 0.15007  
598 -> 609 0.13056  
598 -> 613 0.10436  
600 -> 611 0.11631

**Excited State 31: Singlet-EU 3.6748 eV 337.39 nm f=0.0782**

**<S\*\*2>=0.000**

577 -> 612 0.15255  
579 -> 609 0.18737  
579 -> 613 -0.17613  
580 -> 612 -0.22583  
585 -> 612 0.23914  
586 -> 609 -0.20854  
586 -> 613 0.20304  
588 -> 612 0.17174  
593 -> 612 -0.10242  
594 -> 613 0.10570  
597 -> 612 -0.15007  
599 -> 609 0.13056  
599 -> 613 -0.10436  
600 -> 612 0.11631

Excited State 32: Singlet-B2G 3.6802 eV 336.90 nm f=0.0000 <S\*\*2>=0.000

Excited State 33: Singlet-A1U 3.7188 eV 333.40 nm f=0.0000 <S\*\*2>=0.000

Excited State 34: Singlet-EG 3.8101 eV 325.41 nm f=0.0000 <S\*\*2>=0.000

Excited State 35: Singlet-EG 3.8101 eV 325.41 nm f=0.0000 <S\*\*2>=0.000

Excited State 36: Singlet-B2U 3.8874 eV 318.94 nm f=0.0000 <S\*\*2>=0.000

Excited State 37: Singlet-B2U 3.9307 eV 315.42 nm f=0.0000 <S\*\*2>=0.000

Excited State 38: Singlet-A2G 3.9389 eV 314.77 nm f=0.0000 <S\*\*2>=0.000

Excited State 39: Singlet-EG 3.9603 eV 313.06 nm f=0.0000 <S\*\*2>=0.000

Excited State 40: Singlet-EG 3.9603 eV 313.06 nm f=0.0000 <S\*\*2>=0.000

Excited State 41: Singlet-A2G 3.9668 eV 312.55 nm f=0.0000 <S\*\*2>=0.000

**Excited State 42: Singlet-A2U 4.0040 eV 309.65 nm f=0.2438**

**<S\*\*2>=0.000**

577 -> 610 0.15599  
578 -> 614 0.17566  
579 -> 615 0.17566  
580 -> 616 0.21032  
585 -> 610 0.26072  
586 -> 615 -0.20390  
587 -> 614 0.20390  
588 -> 616 -0.15821  
593 -> 610 -0.15622  
594 -> 615 -0.13056  
595 -> 614 -0.13056  
597 -> 616 0.16434  
598 -> 614 0.12360

599 -> 615 0.12360  
 600 -> 610 0.12693  
 Excited State 43: Singlet-EG 4.0059 eV 309.51 nm f=0.0000 <S\*\*2>=0.000  
 Excited State 44: Singlet-EG 4.0059 eV 309.51 nm f=0.0000 <S\*\*2>=0.000  
 Excited State 45: Singlet-B2U 4.0115 eV 309.07 nm f=0.0000 <S\*\*2>=0.000  
**Excited State 46: Singlet-A2U 4.0205 eV 308.38 nm f=0.0119**  
**<S\*\*2>=0.000**  
 601 -> 609 0.13098  
 602 -> 611 0.11622  
 603 -> 612 -0.11622  
 605 -> 613 0.46968  
 606 -> 611 -0.26195  
 607 -> 612 -0.26195  
 608 -> 620 -0.19777  
 Excited State 47: Singlet-B1U 4.0754 eV 304.23 nm f=0.0000 <S\*\*2>=0.000  
**Excited State 48: Singlet-EU 4.0821 eV 303.72 nm f=1.9839**  
**<S\*\*2>=0.000**  
 577 -> 612 -0.12840  
 579 -> 609 -0.12778  
 579 -> 613 0.15171  
 580 -> 612 0.14950  
 593 -> 619 0.11300  
 594 -> 620 -0.11138  
 595 -> 617 -0.13687  
 596 -> 611 0.11621  
 596 -> 618 -0.16885  
 597 -> 612 -0.10053  
 598 -> 617 -0.13170  
 599 -> 609 0.21438  
 600 -> 612 0.19679  
 600 -> 619 0.11317  
 603 -> 610 -0.11221  
 604 -> 614 0.13088  
 605 -> 615 0.10901  
 607 -> 610 0.20764  
 608 -> 615 0.10586  
**Excited State 49: Singlet-EU 4.0821 eV 303.72 nm f=1.9839**  
**<S\*\*2>=0.000**  
 577 -> 611 -0.12840  
 578 -> 609 -0.12778  
 578 -> 613 -0.15171  
 580 -> 611 -0.14950  
 593 -> 618 -0.11300  
 594 -> 617 -0.13687  
 595 -> 620 -0.11138  
 596 -> 612 0.11621

596 -> 619 0.16886  
 597 -> 611 0.10053  
 598 -> 609 0.21438  
 599 -> 617 -0.13170  
 600 -> 611 0.19679  
 600 -> 618 -0.11317  
 602 -> 610 0.11221  
 604 -> 615 0.13088  
 605 -> 614 -0.10901  
 606 -> 610 0.20764  
 608 -> 614 0.10586  
**Excited State 50:** Singlet-?Sym 4.1061 eV 301.95 nm f=0.0000 <S\*\*2>=0.000  
**Excited State 51:** Singlet-EG 4.1261 eV 300.48 nm f=0.0000 <S\*\*2>=0.000  
**Excited State 52:** Singlet-EG 4.1261 eV 300.48 nm f=0.0000 <S\*\*2>=0.000  
**Excited State 53:** Singlet-?Sym 4.1609 eV 297.98 nm f=0.0000 <S\*\*2>=0.000  
**Excited State 54:** Singlet-A2U 4.1809 eV 296.55 nm f=0.0754  
 <S\*\*2>=0.000  
 568 -> 609 -0.11007  
 569 -> 613 0.21251  
 570 -> 612 0.19799  
 571 -> 611 0.19800  
 573 -> 609 0.28596  
 574 -> 611 0.22164  
 575 -> 612 -0.22164  
 576 -> 613 0.20868  
 605 -> 613 -0.19451  
**Excited State 55:** Singlet-B2U 4.1838 eV 296.35 nm f=0.0000 <S\*\*2>=0.000  
**Excited State 56:** Singlet-EU 4.1840 eV 296.33 nm f=0.8733  
 <S\*\*2>=0.000  
 577 -> 612 0.11414  
 579 -> 609 0.11158  
 579 -> 613 -0.11289  
 580 -> 612 -0.10898  
 603 -> 610 -0.14133  
 605 -> 615 0.12448  
 606 -> 616 -0.22052  
 606 -> 621 0.12251  
 607 -> 616 0.33987  
 608 -> 614 0.11980  
 608 -> 615 0.18464  
 608 -> 623 -0.10469  
**Excited State 57:** Singlet-EU 4.1840 eV 296.33 nm f=0.8733  
 <S\*\*2>=0.000  
 577 -> 611 -0.11414  
 578 -> 609 -0.11158  
 578 -> 613 -0.11289



580 -> 611 -0.10898  
 602 -> 610 -0.14133  
 605 -> 614 0.12448  
 606 -> 616 0.33987  
 607 -> 616 0.22052  
 607 -> 621 -0.12251  
 608 -> 614 -0.18464  
 608 -> 615 0.11980  
 608 -> 622 -0.10469  
 Excited State 58: Singlet-EG 4.1883 eV 296.03 nm f=0.0000 <S\*\*2>=0.000  
 Excited State 59: Singlet-EG 4.1883 eV 296.03 nm f=0.0000 <S\*\*2>=0.000  
 Excited State 60: Singlet-A1U 4.2177 eV 293.96 nm f=0.0000 <S\*\*2>=0.000  
 Excited State 61: Singlet-B2G 4.2496 eV 291.75 nm f=0.0000 <S\*\*2>=0.000  
 Excited State 62: Singlet-B1G 4.2514 eV 291.63 nm f=0.0000 <S\*\*2>=0.000  
**Excited State 63: Singlet-EU 4.2595 eV 291.08 nm f=0.1694**  
**<S\*\*2>=0.000**  
 604 -> 615 -0.13178  
 605 -> 614 0.38017  
 605 -> 615 0.25975  
 606 -> 610 -0.18696  
 606 -> 616 -0.25448  
 607 -> 610 0.12774  
 607 -> 616 -0.17387  
 608 -> 614 0.13822  
**Excited State 64: Singlet-EU 4.2595 eV 291.08 nm f=0.1694**  
**<S\*\*2>=0.000**  
 604 -> 614 0.13178  
 605 -> 614 -0.25975  
 605 -> 615 0.38017  
 606 -> 610 0.12774  
 606 -> 616 0.17387  
 607 -> 610 0.18696  
 607 -> 616 -0.25448  
 608 -> 615 -0.13822  
 Excited State 65: Singlet-B1U 4.2834 eV 289.45 nm f=0.0000 <S\*\*2>=0.000  
 Excited State 66: Singlet-EG 4.2946 eV 288.70 nm f=0.0000 <S\*\*2>=0.000  
 Excited State 67: Singlet-EG 4.2946 eV 288.70 nm f=0.0000 <S\*\*2>=0.000  
 Excited State 68: Singlet-A1G 4.2958 eV 288.62 nm f=0.0000 <S\*\*2>=0.000  
**Excited State 69: Singlet-EU 4.3057 eV 287.95 nm f=0.0489**  
**<S\*\*2>=0.000**  
 601 -> 614 -0.15227  
 602 -> 610 -0.10343  
 602 -> 616 -0.11763  
 605 -> 622 -0.21285  
 606 -> 616 0.12902  
 607 -> 621 0.25994

607 -> 627 0.23138  
 608 -> 622 0.27363  
**Excited State 70: Singlet-EU 4.3057 eV 287.95 nm f=0.0489**  
**<S\*\*2>=0.000**  
 601 -> 615 0.15227  
 603 -> 610 -0.10343  
 603 -> 616 0.11763  
 605 -> 623 0.21285  
 606 -> 621 -0.25994  
 606 -> 627 0.23138  
 607 -> 616 0.12902  
 608 -> 623 0.27363  
**Excited State 71: Singlet-A2U 4.3120 eV 287.53 nm f=0.0513**  
**<S\*\*2>=0.000**  
 574 -> 611 -0.10515  
 575 -> 612 0.10515  
 576 -> 613 -0.11132  
 601 -> 609 0.27482  
 601 -> 620 -0.14359  
 602 -> 611 0.21191  
 602 -> 618 -0.16993  
 603 -> 612 -0.21191  
 603 -> 619 -0.16993  
 604 -> 617 -0.21290  
 605 -> 613 -0.18074  
 608 -> 620 -0.20117  
**Excited State 72: Singlet-A2G 4.4022 eV 281.64 nm f=0.0000 <S\*\*2>=0.000**  
**Excited State 73: Singlet-B2G 4.4072 eV 281.32 nm f=0.0000 <S\*\*2>=0.000**  
**Excited State 74: Singlet-EU 4.4078 eV 281.29 nm f=0.1552**  
**<S\*\*2>=0.000**  
 568 -> 615 -0.10807  
 569 -> 615 -0.19620  
 570 -> 610 0.19151  
 570 -> 616 -0.17052  
 573 -> 614 -0.12872  
 573 -> 615 0.25480  
 574 -> 610 -0.11419  
 575 -> 610 -0.22603  
 575 -> 616 0.18714  
 576 -> 615 -0.19420  
**Excited State 75: Singlet-EU 4.4078 eV 281.29 nm f=0.1553**  
**<S\*\*2>=0.000**  
 577 -> 611 0.12329  
 578 -> 609 0.10464  
 585 -> 611 -0.20655  
 587 -> 609 -0.23073

587 -> 613 -0.22256  
 588 -> 611 0.24622  
 593 -> 611 -0.15288  
 595 -> 609 -0.11244  
 595 -> 613 -0.16016  
 597 -> 611 0.15707  
 598 -> 609 0.12795  
 Excited State 76: Singlet-A2G 4.4205 eV 280.48 nm f=0.0000 <S\*\*2>=0.000  
**Excited State 77: Singlet-EU 4.4398 eV 279.26 nm f=0.9508**  
**<S\*\*2>=0.000**  
 577 -> 612 -0.12329  
 579 -> 609 -0.10464  
 585 -> 612 0.20655  
 586 -> 609 -0.23073  
 586 -> 613 0.22256  
 588 -> 612 0.24622  
 593 -> 612 0.15288  
 594 -> 609 0.11244  
 594 -> 613 -0.16016  
 597 -> 612 0.15707  
 599 -> 609 -0.12795  
**Excited State 78: Singlet-EU 4.4398 eV 279.26 nm f=0.9508**  
**<S\*\*2>=0.000**  
 577 -> 612 -0.12329  
 579 -> 609 -0.10464  
 585 -> 612 0.20655  
 586 -> 609 -0.23073  
 586 -> 613 0.22256  
 588 -> 612 0.24622  
 593 -> 612 0.15288  
 594 -> 609 0.11244  
 594 -> 613 -0.16016  
 597 -> 612 0.15707  
 599 -> 609 -0.12795  
 Excited State 79: Singlet-B2G 4.4629 eV 277.81 nm f=0.0000 <S\*\*2>=0.000  
 Excited State 80: Singlet-B2U 4.4713 eV 277.29 nm f=0.0000 <S\*\*2>=0.000  
 Excited State 81: Singlet-EG 4.4751 eV 277.06 nm f=0.0000 <S\*\*2>=0.000  
 Excited State 82: Singlet-EG 4.4751 eV 277.06 nm f=0.0000 <S\*\*2>=0.000  
 Excited State 83: Singlet-A1U 4.4874 eV 276.29 nm f=0.0000 <S\*\*2>=0.000  
**Excited State 84: Singlet-A2U 4.4891 eV 276.19 nm f=2.6367**  
**<S\*\*2>=0.000**  
 577 -> 610 0.21245  
 578 -> 614 0.18537  
 579 -> 615 0.18537  
 580 -> 616 0.16839  
 593 -> 610 0.24275

594 -> 615 0.20162  
 595 -> 614 0.20162  
 597 -> 616 -0.22950  
 598 -> 614 -0.15172  
 599 -> 615 -0.15172  
 600 -> 610 -0.14460  
 605 -> 613 0.16694  
**Excited State 85: Singlet-B1G 4.5248 eV 274.01 nm f=0.0000 <S\*\*2>=0.000**  
**Excited State 86: Singlet-EG 4.5394 eV 273.13 nm f=0.0000 <S\*\*2>=0.000**  
**Excited State 87: Singlet-EG 4.5394 eV 273.13 nm f=0.0000 <S\*\*2>=0.000**  
**Excited State 88: Singlet-A2G 4.5647 eV 271.62 nm f=0.0000 <S\*\*2>=0.000**  
**Excited State 89: Singlet-B1U 4.5802 eV 270.69 nm f=0.0000 <S\*\*2>=0.000**  
**Excited State 90: Singlet-A1U 4.5965 eV 269.73 nm f=0.0000 <S\*\*2>=0.000**  
**Excited State 91: Singlet-EG 4.5972 eV 269.69 nm f=0.0000 <S\*\*2>=0.000**  
**Excited State 92: Singlet-EG 4.5972 eV 269.69 nm f=0.0000 <S\*\*2>=0.000**  
**Excited State 93: Singlet-B2U 4.5987 eV 269.61 nm f=0.0000 <S\*\*2>=0.000**  
**Excited State 94: Singlet-EU 4.6212 eV 268.30 nm f=0.1928**  
**<S\*\*2>=0.000**  
 572 -> 614 -0.12320  
 593 -> 612 -0.11569  
 594 -> 609 -0.13488  
 603 -> 610 -0.22422  
 603 -> 616 -0.18558  
 604 -> 614 0.31763  
 605 -> 615 -0.18138  
 607 -> 616 0.11921  
 608 -> 623 0.11559  
**Excited State 95: Singlet-EU 4.6212 eV 268.30 nm f=0.1928**  
**<S\*\*2>=0.000**  
 572 -> 615 0.12320  
 593 -> 611 -0.11569  
 595 -> 609 -0.13488  
 602 -> 610 0.22422  
 602 -> 616 -0.18558  
 604 -> 615 0.31763  
 605 -> 614 0.18138  
 606 -> 616 -0.11921  
 608 -> 622 -0.11559  
**Excited State 96: Singlet-B1U 4.6483 eV 266.73 nm f=0.0000 <S\*\*2>=0.000**  
**Excited State 97: Singlet-A1G 4.6601 eV 266.05 nm f=0.0000 <S\*\*2>=0.000**  
**Excited State 98: Singlet-B1G 4.6636 eV 265.85 nm f=0.0000 <S\*\*2>=0.000**  
**Excited State 99: Singlet-EU 4.6714 eV 265.41 nm f=0.0083**  
**<S\*\*2>=0.000**  
 561 -> 611 0.30167  
 563 -> 609 0.30736  
 563 -> 613 0.29941

564 -> 611 0.30290  
 608 -> 623 -0.10283  
**Excited State 100: Singlet-EU 4.6714 eV 265.41 nm f=0.0083**  
**<S\*\*2>=0.000**  
 561 -> 612 -0.30167  
 562 -> 609 0.30736  
 562 -> 613 -0.29941  
 564 -> 612 0.30290  
 608 -> 622 0.10283  
 Excited State 101: Singlet-EG 4.7052 eV 263.50 nm f=0.0000 <S\*\*2>=0.000  
 Excited State 102: Singlet-EG 4.7052 eV 263.50 nm f=0.0000 <S\*\*2>=0.000  
 Excited State 103: Singlet-A1G 4.7341 eV 261.90 nm f=0.0000 <S\*\*2>=0.000  
 Excited State 104: Singlet-B1U 4.7657 eV 260.16 nm f=0.0000 <S\*\*2>=0.000  
 Excited State 105: Singlet-EG 4.7801 eV 259.38 nm f=0.0000 <S\*\*2>=0.000  
 Excited State 106: Singlet-EG 4.7801 eV 259.38 nm f=0.0000 <S\*\*2>=0.000  
 Excited State 107: Singlet-A1U 4.7890 eV 258.89 nm f=0.0000 <S\*\*2>=0.000  
**Excited State 108: Singlet-A2U 4.7921 eV 258.73 nm f=0.0003**  
**<S\*\*2>=0.000**  
 593 -> 610 0.22603  
 594 -> 615 0.15084  
 595 -> 614 0.15084  
 596 -> 621 -0.10768  
 598 -> 614 0.18176  
 599 -> 615 0.18176  
 600 -> 610 0.29159  
 601 -> 609 0.20237  
 602 -> 611 0.15242  
 603 -> 612 -0.15242  
 605 -> 613 -0.14193  
 Excited State 109: Singlet-B1G 4.8079 eV 257.87 nm f=0.0000 <S\*\*2>=0.000  
**Excited State 110: Singlet-EU 4.8092 eV 257.81 nm f=0.0014**  
**<S\*\*2>=0.000**  
 593 -> 610 0.22603  
 594 -> 615 0.15084  
 595 -> 614 0.15084  
 596 -> 621 -0.10768  
 598 -> 614 0.18176  
 599 -> 615 0.18176  
 600 -> 610 0.29159  
 601 -> 609 0.20237  
 602 -> 611 0.15242  
 603 -> 612 -0.15242  
 605 -> 613 -0.14193  
**Excited State 111: Singlet-EU 4.8092 eV 257.81 nm f=0.0014**  
**<S\*\*2>=0.000**  
 558 -> 610 0.11563

558 -> 616 -0.10744  
 560 -> 615 -0.18716  
 565 -> 615 0.19169  
 567 -> 610 0.17386  
 567 -> 616 -0.14178  
 581 -> 612 0.18089  
 583 -> 609 0.17819  
 583 -> 613 -0.17751  
 584 -> 612 -0.18489  
**Excited State 112:** Singlet-A1G 4.8205 eV 257.20 nm f=0.0000 <S\*\*2>=0.000  
**Excited State 113:** Singlet-A2U 4.8578 eV 255.23 nm f=0.7063 <S\*\*2>=0.000  
**Excited State 114:** Singlet-A1U 4.8690 eV 254.64 nm f=0.0000 <S\*\*2>=0.000  
**Excited State 115:** Singlet-B1G 4.8894 eV 253.58 nm f=0.0000 <S\*\*2>=0.000  
**Excited State 116:** Singlet-A2G 4.8953 eV 253.27 nm f=0.0000 <S\*\*2>=0.000  
**Excited State 117:** Singlet-EG 4.8980 eV 253.13 nm f=0.0000 <S\*\*2>=0.000  
**Excited State 118:** Singlet-EG 4.8980 eV 253.13 nm f=0.0000 <S\*\*2>=0.000  
**Excited State 119: Singlet-EU 4.8994 eV 253.06 nm f=0.1691**  
**<S\*\*2>=0.000**  
 559 -> 610 0.14821  
 559 -> 616 0.10374  
 560 -> 614 0.19818  
 560 -> 615 0.10081  
 565 -> 614 0.19722  
 565 -> 615 -0.10032  
 566 -> 610 0.16189  
 566 -> 616 0.15153  
 581 -> 611 -0.15508  
 582 -> 609 -0.15281  
 582 -> 613 -0.15136  
 584 -> 611 -0.15796  
 608 -> 623 -0.10752  
**Excited State 120: Singlet-EU 4.8994 eV 253.06 nm f=0.1691**  
**<S\*\*2>=0.000**  
 558 -> 610 -0.14821  
 558 -> 616 0.10375  
 560 -> 614 -0.10081  
 560 -> 615 0.19818  
 565 -> 614 -0.10032  
 565 -> 615 -0.19722  
 567 -> 610 -0.16189  
 567 -> 616 0.15153  
 581 -> 612 0.15508  
 583 -> 609 0.15281  
 583 -> 613 -0.15136  
 584 -> 612 -0.15797  
 608 -> 622 -0.10752

Excited State 121: Singlet-B1U 4.9026 eV 252.90 nm f=0.0000 <S\*\*2>=0.000  
Excited State 122: Singlet-EG 4.9097 eV 252.53 nm f=0.0000 <S\*\*2>=0.000  
Excited State 123: Singlet-EG 4.9097 eV 252.53 nm f=0.0000 <S\*\*2>=0.000  
Excited State 124: Singlet-B1U 4.9183 eV 252.09 nm f=0.0000 <S\*\*2>=0.000  
Excited State 125: Singlet-A1G 4.9209 eV 251.95 nm f=0.0000 <S\*\*2>=0.000

**Excited State 126: Singlet-EU 4.9247 eV 251.76 nm f=0.1781**  
**<S\*\*2>=0.000**

593 -> 612 -0.11506  
594 -> 609 -0.16649  
595 -> 609 0.10935  
596 -> 611 -0.11942  
597 -> 612 -0.11357  
599 -> 613 -0.11300  
601 -> 614 -0.16577  
601 -> 615 0.25239  
602 -> 610 -0.12004  
602 -> 616 -0.14160  
603 -> 610 -0.18277  
603 -> 616 0.21560  
604 -> 614 -0.10108

**Excited State 127: Singlet-EU 4.9247 eV 251.76 nm f=0.1781**  
**<S\*\*2>=0.000**

593 -> 611 -0.11506  
594 -> 609 -0.10935  
595 -> 609 -0.16649  
596 -> 612 -0.11942  
597 -> 611 0.11357  
598 -> 613 0.11300  
601 -> 614 0.25239  
601 -> 615 0.16577  
602 -> 610 0.18277  
602 -> 616 0.21560  
603 -> 610 -0.12004  
603 -> 616 0.14160  
604 -> 615 -0.10108

Excited State 128: Singlet-B2G 4.9264 eV 251.67 nm f=0.0000 <S\*\*2>=0.000  
Excited State 129: Singlet-A1U 4.9407 eV 250.95 nm f=0.0000 <S\*\*2>=0.000  
Excited State 130: Singlet-EG 4.9747 eV 249.23 nm f=0.0000 <S\*\*2>=0.000  
Excited State 131: Singlet-EG 4.9747 eV 249.23 nm f=0.0000 <S\*\*2>=0.000  
Excited State 132: Singlet-B2U 4.9898 eV 248.48 nm f=0.0000 <S\*\*2>=0.000  
Excited State 133: Singlet-EG 5.0587 eV 245.09 nm f=0.0000 <S\*\*2>=0.000  
Excited State 134: Singlet-EG 5.0587 eV 245.09 nm f=0.0000 <S\*\*2>=0.000  
Excited State 135: Singlet-?Sym 5.0614 eV 244.96 nm f=0.0000 <S\*\*2>=0.000  
Excited State 136: Singlet-B2U 5.0967 eV 243.26 nm f=0.0000 <S\*\*2>=0.000  
Excited State 137: Singlet-A2G 5.1202 eV 242.15 nm f=0.0000 <S\*\*2>=0.000

**Excited State 138: Singlet-A2U 5.1451 eV 240.97 nm f=0.0676**

**<S\*\*2>=0.000**

606 -> 618 -0.35320

607 -> 619 0.35320

608 -> 620 0.45495

**Excited State 139: Singlet-EU 5.1677 eV 239.92 nm f=0.0665**

**<S\*\*2>=0.000**

605 -> 623 0.13078

605 -> 634 -0.11606

605 -> 635 -0.19770

606 -> 629 -0.16255

606 -> 636 -0.13330

607 -> 629 0.27689

607 -> 636 -0.22707

608 -> 623 -0.10882

608 -> 634 -0.16649

608 -> 635 0.28359

**Excited State 140: Singlet-EU 5.1677 eV 239.92 nm f=0.0665**

**<S\*\*2>=0.000**

605 -> 622 0.13078

605 -> 634 0.19770

605 -> 635 -0.11606

606 -> 629 0.27689

606 -> 636 0.22707

607 -> 629 0.16255

607 -> 636 -0.13330

608 -> 622 0.10882

608 -> 634 0.28360

608 -> 635 0.16648



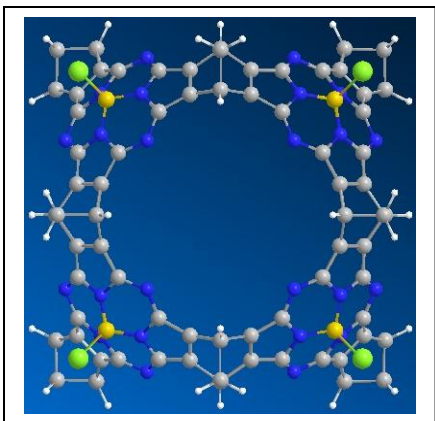

Excited State 1: Singlet-EU 2.8230 eV 439.20 nm f=0.0000 <S\*\*2>=0.000  
 Excited State 2: Singlet-EU 2.8230 eV 439.20 nm f=0.0000 <S\*\*2>=0.000  
 Excited State 3: Singlet-T1G 2.8273 eV 438.53 nm f=0.0000 <S\*\*2>=0.000  
 Excited State 4: Singlet-T1G 2.8273 eV 438.53 nm f=0.0000 <S\*\*2>=0.000  
 Excited State 5: Singlet-T1G 2.8273 eV 438.53 nm f=0.0000 <S\*\*2>=0.000

**Excited State 6: Singlet-T1U 2.9714 eV 417.26 nm f=0.9137**

**<S\*\*2>=0.000**

669 -> 687 -0.20106  
 670 -> 683 -0.10557  
 670 -> 689 -0.17193  
 671 -> 677 -0.20621  
 672 -> 682 0.10557  
 672 -> 690 0.17193  
 673 -> 680 0.19698  
 673 -> 686 0.10660  
 674 -> 681 0.19698  
 674 -> 685 0.10660  
 675 -> 691 0.11085  
 675 -> 692 0.16864  
 676 -> 684 0.22435

**Excited State 7: Singlet-T1U 2.9714 eV 417.26 nm f=0.9137**

**<S\*\*2>=0.000**

669 -> 685 0.15157  
 669 -> 686 0.15178  
 670 -> 677 0.13303  
 670 -> 678 -0.10270  
 670 -> 688 0.12978  
 671 -> 689 0.12961  
 671 -> 690 -0.12979  
 672 -> 678 0.16678  
 672 -> 688 -0.12961  
 673 -> 679 0.14870  
 673 -> 692 -0.13594

674 -> 679 -0.14850  
674 -> 691 -0.15209  
675 -> 680 -0.14850  
675 -> 681 -0.14870  
676 -> 682 0.16913  
676 -> 683 -0.16936

**Excited State 8: Singlet-T1U 2.9714 eV 417.26 nm f=0.9137**

**<S\*\*2>=0.000**

669 -> 685 0.14387  
669 -> 686 -0.14059  
670 -> 677 0.12626  
670 -> 688 -0.12022  
671 -> 689 0.12302  
671 -> 690 0.12022  
672 -> 678 -0.15449  
672 -> 688 -0.12302  
673 -> 679 -0.13774  
673 -> 692 -0.12903  
674 -> 679 -0.14095  
674 -> 691 0.14088  
675 -> 680 -0.14095  
675 -> 681 0.13774  
676 -> 682 0.16053  
676 -> 683 0.15688

Excited State 9: Singlet-T2G 3.0003 eV 413.23 nm f=0.0000 <S\*\*2>=0.000  
Excited State 10: Singlet-T2G 3.0003 eV 413.23 nm f=0.0000 <S\*\*2>=0.000  
Excited State 11: Singlet-?Sym 3.0003 eV 413.23 nm f=0.0000 <S\*\*2>=0.000  
Excited State 12: Singlet-?Sym 3.0340 eV 408.65 nm f=0.0000 <S\*\*2>=0.000  
Excited State 13: Singlet-T2U 3.0340 eV 408.65 nm f=0.0000 <S\*\*2>=0.000  
Excited State 14: Singlet-T2U 3.0340 eV 408.65 nm f=0.0000 <S\*\*2>=0.000  
Excited State 15: Singlet-?Sym 3.0433 eV 407.41 nm f=0.0000 <S\*\*2>=0.000  
Excited State 16: Singlet-?Sym 3.0433 eV 407.41 nm f=0.0000 <S\*\*2>=0.000  
Excited State 17: Singlet-?Sym 3.5297 eV 351.26 nm f=0.0000 <S\*\*2>=0.000  
Excited State 18: Singlet-?Sym 3.5689 eV 347.40 nm f=0.0000 <S\*\*2>=0.000  
Excited State 19: Singlet-?Sym 3.5689 eV 347.40 nm f=0.0000 <S\*\*2>=0.000  
Excited State 20: Singlet-?Sym 3.5689 eV 347.40 nm f=0.0000 <S\*\*2>=0.000  
Excited State 21: Singlet-?Sym 3.6202 eV 342.48 nm f=0.0000 <S\*\*2>=0.000  
Excited State 22: Singlet-?Sym 3.6202 eV 342.48 nm f=0.0000 <S\*\*2>=0.000  
Excited State 23: Singlet-?Sym 3.6202 eV 342.48 nm f=0.0000 <S\*\*2>=0.000  
Excited State 24: Singlet-?Sym 3.7254 eV 332.81 nm f=0.0000 <S\*\*2>=0.000  
Excited State 25: Singlet-?Sym 3.7664 eV 329.19 nm f=0.0000 <S\*\*2>=0.000  
Excited State 26: Singlet-?Sym 3.7664 eV 329.19 nm f=0.0000 <S\*\*2>=0.000  
Excited State 27: Singlet-?Sym 3.7672 eV 329.12 nm f=0.0000 <S\*\*2>=0.000  
Excited State 28: Singlet-?Sym 3.7672 eV 329.12 nm f=0.0000 <S\*\*2>=0.000  
Excited State 29: Singlet-?Sym 3.7672 eV 329.12 nm f=0.0000 <S\*\*2>=0.000  
Excited State 30: Singlet-?Sym 3.8714 eV 320.26 nm f=0.0000 <S\*\*2>=0.000

Excited State 31: Singlet-?Sym 3.8714 eV 320.26 nm f=0.0000 <S\*\*2>=0.000  
Excited State 32: Singlet-?Sym 3.8714 eV 320.26 nm f=0.0000 <S\*\*2>=0.000  
Excited State 33: Singlet-?Sym 3.9142 eV 316.75 nm f=0.0000 <S\*\*2>=0.000  
Excited State 34: Singlet-?Sym 3.9142 eV 316.75 nm f=0.0000 <S\*\*2>=0.000  
Excited State 35: Singlet-?Sym 3.9142 eV 316.75 nm f=0.0000 <S\*\*2>=0.000

**Excited State 36: Singlet-?Sym 3.9537 eV 313.59 nm f=0.0205**

**<S\*\*2>=0.000**

637 -> 679 0.10412  
640 -> 678 0.11350  
644 -> 688 -0.10811  
646 -> 682 0.10115  
647 -> 683 -0.10115  
652 -> 691 0.10465  
661 -> 690 -0.12941  
662 -> 689 0.12941  
664 -> 692 0.12587  
665 -> 686 -0.15934  
666 -> 685 -0.15934  
667 -> 684 0.16070  
668 -> 688 0.15483

**Excited State 37: Singlet-?Sym 3.9537 eV 313.59 nm f=0.0205**

**<S\*\*2>=0.000**

637 -> 681 0.11168  
638 -> 678 -0.10417  
644 -> 690 -0.11596  
645 -> 683 0.10850  
646 -> 684 0.10850  
650 -> 691 -0.12003  
660 -> 691 0.11300  
661 -> 688 -0.13881  
663 -> 689 0.13881  
664 -> 686 -0.17091  
665 -> 692 -0.14435  
666 -> 687 0.17091  
667 -> 690 0.14919  
668 -> 682 -0.15484

**Excited State 38: Singlet-?Sym 3.9537 eV 313.59 nm f=0.0205**

**<S\*\*2>=0.000**

637 -> 680 -0.10322  
639 -> 677 0.12055  
644 -> 689 -0.10718  
645 -> 682 -0.10028  
646 -> 678 -0.10164  
647 -> 684 0.10028  
648 -> 680 0.10372  
651 -> 692 0.12395

659 -> 692 -0.11669  
 662 -> 688 0.12829  
 663 -> 690 0.12829  
 664 -> 685 -0.15796  
 665 -> 687 0.15796  
 666 -> 691 -0.14907  
 667 -> 689 -0.12797  
 668 -> 683 -0.13281  
**Excited State 39: Singlet-?Sym 3.9579 eV 313.26 nm f=0.0000 <S\*\*2>=0.000**  
**Excited State 40: Singlet-?Sym 3.9579 eV 313.26 nm f=0.0000 <S\*\*2>=0.000**  
**Excited State 41: Singlet-?Sym 4.1601 eV 298.03 nm f=0.0000 <S\*\*2>=0.000**  
**Excited State 42: Singlet-?Sym 4.1632 eV 297.81 nm f=0.0000 <S\*\*2>=0.000**  
**Excited State 43: Singlet-?Sym 4.1632 eV 297.81 nm f=0.0000 <S\*\*2>=0.000**  
**Excited State 44: Singlet-?Sym 4.1632 eV 297.81 nm f=0.0000 <S\*\*2>=0.000**  
**Excited State 45: Singlet-?Sym 4.1673 eV 297.52 nm f=0.0103**  
**<S\*\*2>=0.000**  
 610 -> 678 0.11965  
 611 -> 682 0.11046  
 612 -> 683 -0.11046  
 613 -> 681 -0.11583  
 614 -> 692 -0.10456  
 615 -> 680 -0.11583  
 621 -> 679 0.15753  
 622 -> 687 -0.15376  
 623 -> 677 0.16171  
 624 -> 690 0.13800  
 625 -> 689 -0.13800  
 629 -> 685 -0.13659  
 630 -> 686 0.13659  
 631 -> 691 0.12656  
 635 -> 684 0.12412  
 636 -> 688 -0.11478  
**Excited State 46: Singlet-?Sym 4.1673 eV 297.52 nm f=0.0103**  
**<S\*\*2>=0.000**  
 610 -> 682 -0.10502  
 611 -> 677 0.12188  
 612 -> 684 0.10502  
 613 -> 691 0.11877  
 614 -> 681 0.11013  
 615 -> 679 0.11013  
 619 -> 683 0.11105  
 620 -> 689 0.10297  
 621 -> 680 -0.11942  
 621 -> 686 0.10151  
 622 -> 680 0.10400  
 622 -> 686 0.11656

623 -> 690 0.13121  
624 -> 678 0.16472  
625 -> 688 -0.13121  
629 -> 692 0.14375  
630 -> 687 -0.12986  
631 -> 685 0.12986

**Excited State 47: Singlet-?Sym 4.1673 eV 297.52 nm f=0.0103  
<S\*\*2>=0.000**

610 -> 683 -0.10405  
611 -> 684 0.10405  
613 -> 679 -0.10911  
614 -> 680 0.10911  
615 -> 692 0.10532  
620 -> 682 -0.10359  
621 -> 685 -0.15029  
622 -> 681 0.15398  
623 -> 689 -0.13000  
624 -> 688 0.13000  
625 -> 677 0.13035  
625 -> 678 -0.10063  
629 -> 687 0.12866  
630 -> 691 -0.12747  
631 -> 686 -0.12866  
636 -> 682 0.10600

Excited State 48: Singlet-?Sym 4.1734 eV 297.08 nm f=0.0000 <S\*\*2>=0.000

Excited State 49: Singlet-?Sym 4.4115 eV 281.05 nm f=0.0000 <S\*\*2>=0.000

Excited State 50: Singlet-?Sym 4.4115 eV 281.05 nm f=0.0000 <S\*\*2>=0.000

Excited State 51: Singlet-?Sym 4.4121 eV 281.01 nm f=0.0000 <S\*\*2>=0.000

Excited State 52: Singlet-?Sym 4.4121 eV 281.01 nm f=0.0000 <S\*\*2>=0.000

Excited State 53: Singlet-?Sym 4.4121 eV 281.01 nm f=0.0000 <S\*\*2>=0.000

**Excited State 54: Singlet-?Sym 4.4153 eV 280.80 nm f=0.0230  
<S\*\*2>=0.000**

621 -> 679 -0.12448  
622 -> 687 -0.11515  
623 -> 677 0.12102  
624 -> 682 0.12972  
625 -> 683 -0.12972  
629 -> 681 -0.12158  
630 -> 680 0.12158  
631 -> 691 -0.10919

**Excited State 55: Singlet-?Sym 4.4153 eV 280.80 nm f=0.0230  
<S\*\*2>=0.000**

**Excited State 56: Singlet-?Sym 4.4153 eV 280.80 nm f=0.0230  
<S\*\*2>=0.000**

623 -> 682 0.11674  
624 -> 678 -0.11668

625 -> 684 0.11674  
 629 -> 692 0.11740  
 630 -> 679 -0.10941  
 631 -> 681 0.10941

**Excited State 57: Singlet-?Sym 4.4195 eV 280.54 nm**  
**f=0.0000 <S\*\*2>=0.000**

Excited State 58: Singlet-?Sym 4.4195 eV 280.54 nm f=0.0000 <S\*\*2>=0.000  
 Excited State 59: Singlet-?Sym 4.4235 eV 280.28 nm f=0.0000 <S\*\*2>=0.000  
 Excited State 60: Singlet-?Sym 4.4235 eV 280.28 nm f=0.0000 <S\*\*2>=0.000  
 Excited State 61: Singlet-?Sym 4.4235 eV 280.28 nm f=0.0000 <S\*\*2>=0.000  
 Excited State 62: Singlet-?Sym 4.4244 eV 280.23 nm f=0.0000 <S\*\*2>=0.000  
 Excited State 63: Singlet-?Sym 4.4244 eV 280.23 nm f=0.0000 <S\*\*2>=0.000  
 Excited State 64: Singlet-?Sym 4.4244 eV 280.23 nm f=0.0000 <S\*\*2>=0.000  
 Excited State 65: Singlet-EU 4.4518 eV 278.51 nm f=0.0000 <S\*\*2>=0.000  
 Excited State 66: Singlet-EU 4.4518 eV 278.51 nm f=0.0000 <S\*\*2>=0.000  
 Excited State 67: Singlet-T1G 4.4875 eV 276.29 nm f=0.0000 <S\*\*2>=0.000  
 Excited State 68: Singlet-T1G 4.4875 eV 276.29 nm f=0.0000 <S\*\*2>=0.000  
 Excited State 69: Singlet-T1G 4.4875 eV 276.29 nm f=0.0000 <S\*\*2>=0.000  
 Excited State 70: Singlet-T2G 4.6298 eV 267.79 nm f=0.0000 <S\*\*2>=0.000  
 Excited State 71: Singlet-T2G 4.6298 eV 267.79 nm f=0.0000 <S\*\*2>=0.000  
 Excited State 72: Singlet-?Sym 4.6298 eV 267.79 nm f=0.0000 <S\*\*2>=0.000  
 Excited State 73: Singlet-T2U 4.6675 eV 265.63 nm f=0.0000 <S\*\*2>=0.000  
 Excited State 74: Singlet-T2U 4.6675 eV 265.63 nm f=0.0000 <S\*\*2>=0.000  
 Excited State 75: Singlet-T2U 4.6675 eV 265.63 nm f=0.0000 <S\*\*2>=0.000

**Excited State 76: Singlet-T1U 4.6692 eV 265.54 nm f=1.9884**  
**<S\*\*2>=0.000**

644 -> 688 -0.10637  
 653 -> 683 0.10596  
 654 -> 682 -0.10596  
 655 -> 678 0.11213  
 656 -> 679 0.13843  
 656 -> 681 0.12144  
 657 -> 688 0.10750

**Excited State 77: Singlet-T1U 4.6692 eV 265.54 nm f=1.9884**  
**<S\*\*2>=0.000**

654 -> 677 0.10982  
 656 -> 679 0.10415  
 656 -> 680 0.12654

**Excited State 78: Singlet-T1U 4.6692 eV 265.54 nm f=1.9884**  
**<S\*\*2>=0.000**

644 -> 689 0.10280  
 653 -> 684 -0.10240  
 654 -> 677 0.11610  
 655 -> 682 0.10240  
 656 -> 680 0.13378  
 656 -> 681 0.11006  
 657 -> 689 -0.10389

Excited State 79: Singlet-?Sym 4.7091 eV 263.28 nm f=0.0000 <S\*\*2>=0.000  
Excited State 80: Singlet-?Sym 4.7091 eV 263.28 nm f=0.0000 <S\*\*2>=0.000  
Excited State 81: Singlet-?Sym 4.7572 eV 260.63 nm f=0.0000 <S\*\*2>=0.000  
Excited State 82: Singlet-?Sym 4.7626 eV 260.33 nm f=0.0000 <S\*\*2>=0.000  
Excited State 83: Singlet-?Sym 4.7626 eV 260.33 nm f=0.0000 <S\*\*2>=0.000  
Excited State 84: Singlet-?Sym 4.7626 eV 260.33 nm f=0.0000 <S\*\*2>=0.000

**Excited State 85: Singlet-?Sym 4.7693 eV 259.96 nm f=0.0439**

**<S\*\*2>=0.000**

645 -> 677 0.10490  
646 -> 690 -0.10211  
647 -> 689 0.10211  
649 -> 679 0.12690  
650 -> 686 -0.11506  
651 -> 685 0.11506  
655 -> 678 -0.12405  
661 -> 682 0.12631  
662 -> 683 -0.12631  
663 -> 678 0.15270  
664 -> 692 -0.13669  
665 -> 680 0.17704  
665 -> 686 -0.11600  
666 -> 681 0.17704  
666 -> 685 -0.11600  
667 -> 684 -0.17511  
668 -> 688 0.20427

**Excited State 86: Singlet-?Sym 4.7693 eV 259.96 nm f=0.0439**

**<S\*\*2>=0.000**

648 -> 680 0.10150  
661 -> 677 -0.11626  
664 -> 680 -0.12781  
664 -> 681 -0.12581  
665 -> 679 0.12582  
665 -> 692 0.10551  
666 -> 679 -0.12781  
666 -> 691 0.11605  
667 -> 689 -0.12102  
667 -> 690 0.13247  
668 -> 682 0.11356  
668 -> 683 0.10375

**Excited State 87: Singlet-?Sym 4.7693 eV 259.96 nm f=0.0439**

**<S\*\*2>=0.000**

648 -> 680 -0.10434  
661 -> 677 0.11952  
664 -> 680 -0.12267  
664 -> 681 0.12934  
665 -> 679 -0.12934

665 -> 692 0.10127  
 666 -> 679 -0.12267  
 666 -> 691 -0.11930  
 667 -> 689 0.12441  
 667 -> 690 0.12714  
 668 -> 682 0.10900  
 668 -> 683 -0.10666  
**Excited State 88:** Singlet-?Sym 4.7790 eV 259.44 nm f=0.0000 <S\*\*2>=0.000  
**Excited State 89:** Singlet-?Sym 4.8713 eV 254.52 nm f=0.0000 <S\*\*2>=0.000  
**Excited State 90:** Singlet-EU 4.8713 eV 254.52 nm f=0.0000 <S\*\*2>=0.000  
**Excited State 91:** Singlet-T1G 4.8775 eV 254.19 nm f=0.0000 <S\*\*2>=0.000  
**Excited State 92:** Singlet-T1G 4.8775 eV 254.19 nm f=0.0000 <S\*\*2>=0.000  
**Excited State 93:** Singlet-T1G 4.8775 eV 254.19 nm f=0.0000 <S\*\*2>=0.000  
**Excited State 94:** Singlet-?Sym 4.9080 eV 252.62 nm f=0.0000 <S\*\*2>=0.000  
**Excited State 95:** Singlet-?Sym 4.9176 eV 252.13 nm f=0.0000 <S\*\*2>=0.000  
**Excited State 96:** Singlet-?Sym 4.9176 eV 252.13 nm f=0.0000 <S\*\*2>=0.000  
**Excited State 97:** Singlet-?Sym 4.9176 eV 252.13 nm f=0.0000 <S\*\*2>=0.000  
**Excited State 98:** Singlet-?Sym 4.9291 eV 251.53 nm f=0.0000 <S\*\*2>=0.000  
**Excited State 99:** Singlet-?Sym 4.9291 eV 251.53 nm f=0.0000 <S\*\*2>=0.000  
**Excited State 100:** Singlet-?Sym 4.9291 eV 251.53 nm f=0.0000 <S\*\*2>=0.000  
**Excited State 101:** Singlet-?Sym 4.9386 eV 251.05 nm f=0.0000 <S\*\*2>=0.000  
**Excited State 102:** Singlet-T1U 4.9868 eV 248.62 nm f=1.1005  
 <S\*\*2>=0.000  
 637 -> 679 0.10220  
 657 -> 688 -0.10962  
 663 -> 678 -0.11977  
 669 -> 687 0.16861  
 670 -> 683 0.12873  
 671 -> 677 -0.13600  
 672 -> 682 -0.12873  
 673 -> 680 0.13960  
 673 -> 686 0.13242  
 674 -> 681 0.13960  
 674 -> 685 0.13242  
 676 -> 684 0.23844  
**Excited State 103:** Singlet-T1U 4.9868 eV 248.62 nm f=1.1004  
 <S\*\*2>=0.000  
 661 -> 677 -0.11365  
 669 -> 686 0.14933  
 670 -> 684 0.11401  
 671 -> 682 0.11401  
 672 -> 678 -0.12905  
 673 -> 679 -0.12363  
 673 -> 687 0.11728  
 675 -> 681 0.12363  
 675 -> 685 -0.11728



676 -> 682 0.11089  
 676 -> 683 0.21117  
**Excited State 104: Singlet-T1U 4.9868 eV 248.62 nm f=1.1005**  
**<S\*\*2>=0.000**  
 657 -> 690 -0.10438  
 669 -> 685 -0.16055  
 670 -> 677 0.11082  
 671 -> 683 0.12258  
 672 -> 684 -0.12258  
 674 -> 679 -0.13293  
 674 -> 687 -0.12610  
 675 -> 680 -0.13293  
 675 -> 686 0.12610  
 676 -> 682 0.22704  
 676 -> 683 -0.11659  
 Excited State 105: Singlet-T2G 4.9896 eV 248.48 nm f=0.0000 <S\*\*2>=0.000  
 Excited State 106: Singlet-T2G 4.9896 eV 248.48 nm f=0.0000 <S\*\*2>=0.000  
 Excited State 107: Singlet-T2G 4.9896 eV 248.48 nm f=0.0000 <S\*\*2>=0.000  
 Excited State 108: Singlet-EU 4.9987 eV 248.03 nm f=0.0000 <S\*\*2>=0.000  
 Excited State 109: Singlet-EU 4.9987 eV 248.03 nm f=0.0000 <S\*\*2>=0.000  
 Excited State 110: Singlet-T2G 5.0002 eV 247.96 nm f=0.0000 <S\*\*2>=0.000  
 Excited State 111: Singlet-T2G 5.0002 eV 247.96 nm f=0.0000 <S\*\*2>=0.000  
 Excited State 112: Singlet-T2G 5.0002 eV 247.96 nm f=0.0000 <S\*\*2>=0.000  
 Excited State 113: Singlet-T1G 5.0040 eV 247.77 nm f=0.0000 <S\*\*2>=0.000  
 Excited State 114: Singlet-T1G 5.0040 eV 247.77 nm f=0.0000 <S\*\*2>=0.000  
 Excited State 115: Singlet-T1G 5.0040 eV 247.77 nm f=0.0000 <S\*\*2>=0.000  
 Excited State 116: Singlet-T2U 5.0045 eV 247.75 nm f=0.0000 <S\*\*2>=0.000  
 Excited State 117: Singlet-T2U 5.0045 eV 247.75 nm f=0.0000 <S\*\*2>=0.000  
 Excited State 118: Singlet-T2U 5.0045 eV 247.75 nm f=0.0000 <S\*\*2>=0.000  
**Excited State 119: Singlet-?Sym 5.0053 eV 247.70 nm f=0.0486**  
**<S\*\*2>=0.000**  
 670 -> 683 0.17304  
 670 -> 684 0.12866  
 670 -> 689 -0.11335  
 671 -> 677 0.15077  
 671 -> 682 0.12866  
 672 -> 678 0.12012  
 672 -> 682 -0.17303  
 672 -> 690 0.11335  
 673 -> 679 0.10729  
 673 -> 680 -0.14428  
 673 -> 686 0.18514  
 673 -> 687 0.13767  
 674 -> 681 -0.14429  
 674 -> 685 0.18514  
 674 -> 691 0.10375

675 -> 681 -0.10729  
675 -> 685 -0.13767  
675 -> 692 0.11679  
676 -> 683 0.10701  
676 -> 684 0.14392

**Excited State 120: Singlet-?Sym 5.0053 eV 247.70 nm f=0.0486**

**<S\*\*2>=0.000**

670 -> 684 0.18378  
670 -> 688 -0.12039  
671 -> 682 0.18378  
671 -> 690 0.12039  
672 -> 678 0.17157  
673 -> 679 0.15324  
673 -> 686 -0.10676  
673 -> 687 0.19664  
674 -> 685 -0.10676  
674 -> 691 0.14819  
675 -> 681 -0.15324  
675 -> 685 -0.19664  
676 -> 683 0.15285

**Excited State 121: Singlet-?Sym 5.0053 eV 247.70 nm f=0.0486**

**<S\*\*2>=0.000**

670 -> 677 -0.14646  
670 -> 678 0.11308  
670 -> 683 -0.10838  
671 -> 683 0.19643  
671 -> 689 0.12868  
672 -> 682 0.10838  
672 -> 684 -0.19643  
672 -> 688 -0.12868  
673 -> 686 -0.11596  
673 -> 692 -0.14176  
674 -> 679 0.16379  
674 -> 685 -0.11596  
674 -> 687 -0.21017  
675 -> 680 0.16379  
675 -> 686 0.21017  
676 -> 682 0.16337

Excited State 122: Singlet-EG 5.0090 eV 247.52 nm f=0.0000 <S\*\*2>=0.000

Excited State 123: Singlet-EG 5.0090 eV 247.52 nm f=0.0000 <S\*\*2>=0.000

Excited State 124: Singlet-?Sym 5.0099 eV 247.48 nm f=0.0000 <S\*\*2>=0.000

Excited State 125: Singlet-?Sym 5.0102 eV 247.46 nm f=0.0000 <S\*\*2>=0.000

Excited State 126: Singlet-?Sym 5.0179 eV 247.09 nm f=0.0000 <S\*\*2>=0.000

Excited State 127: Singlet-?Sym 5.0179 eV 247.09 nm f=0.0000 <S\*\*2>=0.000

Excited State 128: Singlet-?Sym 5.0179 eV 247.09 nm f=0.0000 <S\*\*2>=0.000

**Excited State 129: Singlet-T1U 5.0374 eV 246.13 nm f=1.4705**

**<S\*\*2>=0.000**

|            |          |
|------------|----------|
| 657 -> 688 | -0.13387 |
| 659 -> 685 | 0.10133  |
| 660 -> 686 | -0.10133 |
| 663 -> 678 | -0.11006 |
| 669 -> 686 | -0.11583 |
| 669 -> 687 | -0.17439 |
| 670 -> 688 | -0.10498 |
| 670 -> 689 | -0.15805 |
| 671 -> 690 | 0.10498  |
| 672 -> 690 | 0.15805  |
| 674 -> 691 | 0.12596  |
| 675 -> 691 | 0.10434  |
| 675 -> 692 | 0.15874  |

**Excited State 130: Singlet-T1U 5.0374 eV 246.13 nm f=1.4705**

**<S\*\*2>=0.000**

|            |          |
|------------|----------|
| 657 -> 690 | -0.15306 |
| 658 -> 680 | 0.10093  |
| 658 -> 686 | 0.11586  |
| 659 -> 679 | -0.10093 |
| 659 -> 687 | 0.11586  |
| 660 -> 691 | 0.11139  |
| 661 -> 684 | -0.10980 |
| 662 -> 678 | 0.10768  |
| 663 -> 683 | 0.10980  |
| 669 -> 685 | 0.19938  |
| 671 -> 683 | -0.10172 |
| 671 -> 689 | 0.18070  |
| 672 -> 684 | 0.10172  |
| 672 -> 688 | -0.18070 |
| 673 -> 692 | -0.19406 |
| 674 -> 679 | 0.10454  |
| 675 -> 680 | 0.10454  |

**Excited State 131: Singlet-?Sym 5.0374 eV 246.13 nm f=1.4705**

**<S\*\*2>=0.000**

|            |          |
|------------|----------|
| 657 -> 689 | 0.12466  |
| 659 -> 692 | 0.10137  |
| 661 -> 677 | -0.10981 |
| 669 -> 686 | -0.16240 |
| 669 -> 687 | 0.12167  |
| 670 -> 688 | -0.14718 |
| 670 -> 689 | 0.11027  |
| 671 -> 690 | 0.14718  |
| 672 -> 690 | -0.11027 |
| 674 -> 691 | 0.17660  |

675 -> 692 -0.11075

Excited State 132: Singlet-T2U 5.0538 eV 245.33 nm f=0.0000 <S\*\*2>=0.000

Excited State 133: Singlet-T2U 5.0538 eV 245.33 nm f=0.0000 <S\*\*2>=0.000

Excited State 134: Singlet-T2U 5.0538 eV 245.33 nm f=0.0000 <S\*\*2>=0.000

Excited State 135: Singlet-EG 5.1251 eV 241.91 nm f=0.0000 <S\*\*2>=0.000

Excited State 136: Singlet-?Sym 5.1251 eV 241.91 nm f=0.0000 <S\*\*2>=0.000

**Excited State 137: Singlet-?Sym 5.1833 eV 239.20 nm f=0.1047**

**<S\*\*2>=0.000**

637 -> 679 -0.11525

640 -> 678 -0.12042

646 -> 682 -0.10452

647 -> 683 0.10453

650 -> 680 -0.10982

651 -> 681 0.10982

655 -> 678 0.14001

656 -> 679 0.12426

**Excited State 138: Singlet-?Sym 5.1833 eV 239.20 nm f=0.1047**

**<S\*\*2>=0.000**

637 -> 680 0.12784

639 -> 677 -0.14311

645 -> 682 0.11595

646 -> 678 0.11799

647 -> 684 -0.11594

648 -> 680 -0.12205

649 -> 686 -0.10954

650 -> 679 0.12183

652 -> 681 0.12181

653 -> 684 0.10637

654 -> 677 -0.16639

655 -> 682 -0.10639

656 -> 680 -0.13784

659 -> 692 -0.11746

**Excited State 139: Singlet-T1U 5.1833 eV 239.20 nm f=0.1047**

**<S\*\*2>=0.000**

637 -> 681 0.10817

651 -> 679 -0.10307

652 -> 680 0.10309

653 -> 678 0.11244

656 -> 681 -0.11663

Excited State 140: Singlet-?Sym 5.1887 eV 238.95 nm f=0.0000 <S\*\*2>=0.000

SCAGE\_02\_LC-wPBE\_TDDFT

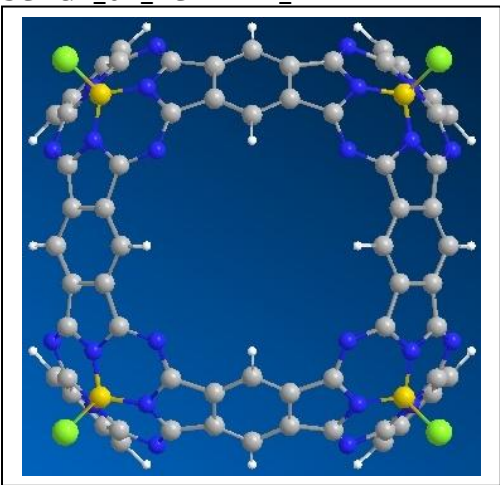

Excited State 1: Singlet-T1G 1.7030 eV 728.04 nm f=0.0000 <S\*\*2>=0.000  
Excited State 2: Singlet-T1G 1.7030 eV 728.04 nm f=0.0000 <S\*\*2>=0.000  
Excited State 3: Singlet-T1G 1.7030 eV 728.04 nm f=0.0000 <S\*\*2>=0.000  
Excited State 4: Singlet-EU 1.7888 eV 693.12 nm f=0.0000 <S\*\*2>=0.000  
Excited State 5: Singlet-EU 1.7888 eV 693.12 nm f=0.0000 <S\*\*2>=0.000

**Excited State 6: Singlet-T1U 2.3196 eV 534.50 nm f=1.6959**

**<S\*\*2>=0.000**

624 -> 632 -0.16960  
625 -> 637 0.10305  
625 -> 638 -0.15275  
626 -> 629 -0.27534  
627 -> 631 0.27534  
628 -> 635 0.43949

**Excited State 7: Singlet-T1U 2.3196 eV 534.50 nm f=1.6959**

**<S\*\*2>=0.000**

623 -> 632 0.15983  
623 -> 633 0.10233  
625 -> 629 -0.27361  
626 -> 637 0.18266  
627 -> 630 0.27361  
628 -> 634 0.43673

**Excited State 8: Singlet-T1U 2.3196 eV 534.50 nm f=1.6959**

**<S\*\*2>=0.000**

622 -> 633 -0.18961  
625 -> 631 -0.27366  
626 -> 630 0.27366  
627 -> 638 0.16461  
628 -> 636 0.43681

Excited State 9: Singlet-EG 2.6933 eV 460.34 nm f=0.0000 <S\*\*2>=0.000

Excited State 10: Singlet-?Sym 2.6933 eV 460.34 nm f=0.0000 <S\*\*2>=0.000

Excited State 11: Singlet-?Sym 2.7223 eV 455.44 nm f=0.0000 <S\*\*2>=0.000

Excited State 12: Singlet-?Sym 2.7223 eV 455.44 nm f=0.0000 <S\*\*2>=0.000

Excited State 13: Singlet-?Sym 2.7223 eV 455.44 nm f=0.0000 <S\*\*2>=0.000

Excited State 14: Singlet-T2U 2.8134 eV 440.70 nm f=0.0000 <S\*\*2>=0.000

Excited State 15: Singlet-T2U 2.8134 eV 440.70 nm f=0.0000 <S\*\*2>=0.000

Excited State 16: Singlet-T2U 2.8134 eV 440.70 nm f=0.0000 <S\*\*2>=0.000

**Excited State 17: Singlet-T1U 3.4019 eV 364.46 nm f=0.1091**

**<S\*\*2>=0.000**

624 -> 632 0.18777  
626 -> 629 0.29678  
627 -> 631 -0.29678  
628 -> 635 0.48101

**Excited State 18: Singlet-T1U 3.4019 eV 364.46 nm f=0.1091**

**<S\*\*2>=0.000**

623 -> 632 -0.17560  
623 -> 633 -0.11243

625 -> 629 0.29267  
627 -> 630 -0.29267  
628 -> 634 0.47435

**Excited State 19: Singlet-T1U 3.4019 eV 364.46 nm f=0.1091**

**<S\*\*2>=0.000**

622 -> 633 0.20827  
625 -> 631 0.29264  
626 -> 630 -0.29264  
628 -> 636 0.47431

Excited State 20: Singlet-T1G 3.4301 eV 361.46 nm f=0.0000 <S\*\*2>=0.000  
Excited State 21: Singlet-T1G 3.4301 eV 361.46 nm f=0.0000 <S\*\*2>=0.000  
Excited State 22: Singlet-T1G 3.4301 eV 361.46 nm f=0.0000 <S\*\*2>=0.000  
Excited State 23: Singlet-EU 3.4505 eV 359.33 nm f=0.0000 <S\*\*2>=0.000  
Excited State 24: Singlet-EU 3.4505 eV 359.33 nm f=0.0000 <S\*\*2>=0.000  
Excited State 25: Singlet-?Sym 3.5496 eV 349.29 nm f=0.0000 <S\*\*2>=0.000  
Excited State 26: Singlet-?Sym 3.6906 eV 335.95 nm f=0.0000 <S\*\*2>=0.000  
Excited State 27: Singlet-?Sym 3.6906 eV 335.95 nm f=0.0000 <S\*\*2>=0.000  
Excited State 28: Singlet-?Sym 3.6906 eV 335.95 nm f=0.0000 <S\*\*2>=0.000  
Excited State 29: Singlet-?Sym 3.7014 eV 334.96 nm f=0.0000 <S\*\*2>=0.000  
Excited State 30: Singlet-?Sym 3.7014 eV 334.96 nm f=0.0000 <S\*\*2>=0.000  
Excited State 31: Singlet-?Sym 3.7014 eV 334.96 nm f=0.0000 <S\*\*2>=0.000  
Excited State 32: Singlet-?Sym 3.7140 eV 333.83 nm f=0.0000 <S\*\*2>=0.000  
Excited State 33: Singlet-?Sym 3.7140 eV 333.83 nm f=0.0000 <S\*\*2>=0.000  
Excited State 34: Singlet-?Sym 3.7140 eV 333.83 nm f=0.0000 <S\*\*2>=0.000  
Excited State 35: Singlet-EG 3.8079 eV 325.60 nm f=0.0000 <S\*\*2>=0.000  
Excited State 36: Singlet-EG 3.8079 eV 325.60 nm f=0.0000 <S\*\*2>=0.000  
Excited State 37: Singlet-?Sym 3.8313 eV 323.61 nm f=0.0000 <S\*\*2>=0.000

**Excited State 38: Singlet-?Sym 4.0551 eV 305.75 nm f=0.4920**

**<S\*\*2>=0.000**

622 -> 633 0.15309  
623 -> 635 0.19347  
624 -> 634 0.19347  
625 -> 647 -0.11344  
626 -> 645 -0.11344  
627 -> 637 0.15559  
627 -> 638 0.31906  
628 -> 636 -0.16539  
628 -> 650 -0.23686

**Excited State 39: Singlet-?Sym 4.0551 eV 305.75 nm f=0.4920**

**<S\*\*2>=0.000**

622 -> 634 -0.19050  
623 -> 636 -0.19050  
624 -> 632 -0.13400  
625 -> 637 -0.19547  
625 -> 638 0.28975  
626 -> 646 -0.11170

627 -> 647 -0.11170  
628 -> 635 0.16285  
628 -> 651 0.23322

**Excited State 40: Singlet-?Sym 4.0551 eV 305.75 nm f=0.4920**

**<S\*\*2>=0.000**

622 -> 635 0.19249  
623 -> 632 -0.12841  
624 -> 636 0.19249  
625 -> 646 0.11287  
626 -> 637 0.35232  
627 -> 645 -0.11287  
628 -> 634 -0.16455  
628 -> 649 0.23566

Excited State 41: Singlet-?Sym 4.0687 eV 304.73 nm f=0.0000 <S\*\*2>=0.000  
Excited State 42: Singlet-?Sym 4.0687 eV 304.73 nm f=0.0000 <S\*\*2>=0.000  
Excited State 43: Singlet-?Sym 4.0687 eV 304.73 nm f=0.0000 <S\*\*2>=0.000  
Excited State 44: Singlet-?Sym 4.0842 eV 303.57 nm f=0.0000 <S\*\*2>=0.000  
Excited State 45: Singlet-T2G 4.1139 eV 301.38 nm f=0.0000 <S\*\*2>=0.000  
Excited State 46: Singlet-T2G 4.1139 eV 301.38 nm f=0.0000 <S\*\*2>=0.000  
Excited State 47: Singlet-T2G 4.1139 eV 301.38 nm f=0.0000 <S\*\*2>=0.000  
Excited State 48: Singlet-?Sym 4.1508 eV 298.70 nm f=0.0000 <S\*\*2>=0.000  
Excited State 49: Singlet-?Sym 4.1508 eV 298.70 nm f=0.0000 <S\*\*2>=0.000  
Excited State 50: Singlet-?Sym 4.1709 eV 297.26 nm f=0.0000 <S\*\*2>=0.000  
Excited State 51: Singlet-?Sym 4.1709 eV 297.26 nm f=0.0000 <S\*\*2>=0.000  
Excited State 52: Singlet-?Sym 4.1709 eV 297.26 nm f=0.0000 <S\*\*2>=0.000  
Excited State 53: Singlet-T2U 4.2730 eV 290.16 nm f=0.0000 <S\*\*2>=0.000  
Excited State 54: Singlet-T2U 4.2730 eV 290.16 nm f=0.0000 <S\*\*2>=0.000  
Excited State 55: Singlet-T2U 4.2730 eV 290.16 nm f=0.0000 <S\*\*2>=0.000  
Excited State 56: Singlet-?Sym 4.3008 eV 288.28 nm f=0.0000 <S\*\*2>=0.000  
Excited State 57: Singlet-T2G 4.3008 eV 288.28 nm f=0.0000 <S\*\*2>=0.000  
Excited State 58: Singlet-?Sym 4.3008 eV 288.28 nm f=0.0000 <S\*\*2>=0.000  
Excited State 59: Singlet-?Sym 4.3123 eV 287.52 nm f=0.0000 <S\*\*2>=0.000

**Excited State 60: Singlet-?Sym 4.3295 eV 286.37 nm f=0.0442**

**<S\*\*2>=0.000**

621 -> 639 -0.10836  
622 -> 642 -0.12540  
623 -> 643 -0.12540  
624 -> 632 0.27987  
624 -> 633 -0.14489  
625 -> 637 -0.11439  
625 -> 638 0.16957  
626 -> 629 -0.23318  
626 -> 640 0.20965  
627 -> 631 0.23318  
627 -> 641 -0.20965  
628 -> 635 0.16402



628 -> 651 -0.11195

**Excited State 61: Singlet-?Sym 4.3295 eV 286.37 nm f=0.0443**  
**<S\*\*2>=0.000**

622 -> 633 0.24448  
623 -> 632 0.16770  
623 -> 633 0.10737  
625 -> 629 0.14733  
625 -> 631 -0.18108  
625 -> 640 0.13247  
625 -> 641 -0.16281  
626 -> 630 0.18108  
626 -> 637 0.12893  
626 -> 639 -0.16281  
627 -> 630 -0.14733  
627 -> 638 -0.14278  
627 -> 639 -0.13247  
628 -> 634 -0.10364  
628 -> 636 0.12738

**Excited State 62: Singlet-?Sym 4.3295 eV 286.37 nm f=0.0443**  
**<S\*\*2>=0.000**

622 -> 633 -0.19877  
623 -> 632 0.20583  
623 -> 633 0.13178  
625 -> 629 0.18083  
625 -> 631 0.14723  
625 -> 640 0.16258  
625 -> 641 0.13237  
626 -> 630 -0.14723  
626 -> 637 0.15824  
626 -> 639 0.13237  
627 -> 630 -0.18083  
627 -> 638 0.11608  
627 -> 639 -0.16258  
628 -> 634 -0.12720  
628 -> 636 -0.10356

Excited State 63: Singlet-?Sym 4.3737 eV 283.48 nm f=0.0000 <S\*\*2>=0.000  
Excited State 64: Singlet-?Sym 4.3901 eV 282.42 nm f=0.0000 <S\*\*2>=0.000  
Excited State 65: Singlet-?Sym 4.3901 eV 282.42 nm f=0.0000 <S\*\*2>=0.000  
Excited State 66: Singlet-?Sym 4.4402 eV 279.23 nm f=0.0000 <S\*\*2>=0.000  
Excited State 67: Singlet-?Sym 4.4402 eV 279.23 nm f=0.0000 <S\*\*2>=0.000  
Excited State 68: Singlet-?Sym 4.4402 eV 279.23 nm f=0.0000 <S\*\*2>=0.000  
Excited State 69: Singlet-?Sym 4.4629 eV 277.81 nm f=0.0000 <S\*\*2>=0.000  
Excited State 70: Singlet-?Sym 4.4629 eV 277.81 nm f=0.0000 <S\*\*2>=0.000  
Excited State 71: Singlet-?Sym 4.4629 eV 277.81 nm f=0.0000 <S\*\*2>=0.000  
Excited State 72: Singlet-?Sym 4.5413 eV 273.02 nm f=0.0000 <S\*\*2>=0.000  
Excited State 73: Singlet-?Sym 4.5413 eV 273.02 nm f=0.0000 <S\*\*2>=0.000

Excited State 74: Singlet-?Sym 4.5413 eV 273.02 nm f=0.0000 <S\*\*2>=0.000  
Excited State 75: Singlet-?Sym 4.5502 eV 272.48 nm f=0.0000 <S\*\*2>=0.000  
Excited State 76: Singlet-?Sym 4.5502 eV 272.48 nm f=0.0000 <S\*\*2>=0.000  
Excited State 77: Singlet-?Sym 4.5700 eV 271.30 nm f=0.0000 <S\*\*2>=0.000  
Excited State 78: Singlet-?Sym 4.5700 eV 271.30 nm f=0.0000 <S\*\*2>=0.000  
Excited State 79: Singlet-?Sym 4.5788 eV 270.78 nm f=0.0000 <S\*\*2>=0.000  
Excited State 80: Singlet-?Sym 4.5788 eV 270.78 nm f=0.0000 <S\*\*2>=0.000  
Excited State 81: Singlet-?Sym 4.5788 eV 270.78 nm f=0.0000 <S\*\*2>=0.000

**Excited State 82: Singlet-?Sym 4.6052 eV 269.23 nm f=0.0909**

**<S\*\*2>=0.000**

596 -> 631 -0.15021  
599 -> 633 0.14253  
609 -> 635 -0.11853  
610 -> 632 -0.14170  
611 -> 636 0.11852  
612 -> 631 0.11449  
613 -> 631 -0.11526  
614 -> 629 -0.15521  
616 -> 630 -0.15521  
619 -> 633 -0.12798  
622 -> 635 -0.18961  
624 -> 636 -0.18961  
625 -> 640 0.10660  
627 -> 639 -0.10660

**Excited State 83: Singlet-?Sym 4.6052 eV 269.23 nm f=0.0909**

**<S\*\*2>=0.000**

596 -> 629 -0.15002  
597 -> 632 0.16884  
609 -> 633 0.16786  
610 -> 635 -0.11837  
611 -> 634 -0.11837  
613 -> 629 0.15659  
614 -> 631 -0.15501  
615 -> 630 0.15501  
617 -> 632 0.15161  
622 -> 633 0.11785  
623 -> 635 0.18937  
624 -> 634 0.18937  
625 -> 641 -0.10646  
626 -> 639 -0.10646

**Excited State 84: Singlet-?Sym 4.6052 eV 269.23 nm f=0.0909**

**<S\*\*2>=0.000**

596 -> 630 -0.15220  
598 -> 633 -0.15229  
600 -> 629 -0.10042  
602 -> 631 0.10042

609 -> 634 0.12010  
610 -> 636 -0.12010  
611 -> 632 -0.15140  
612 -> 630 -0.15915  
615 -> 629 0.15727  
616 -> 631 -0.15727  
618 -> 633 0.13674  
622 -> 634 0.19214  
623 -> 636 0.19213  
624 -> 632 0.10630  
626 -> 640 0.10801  
627 -> 641 -0.10801

**Excited State 85: Singlet-?Sym 4.6642 eV 265.82 nm f=0.0371**  
**<S\*\*2>=0.000**

622 -> 633 0.27959  
623 -> 635 -0.19321  
624 -> 634 -0.19321  
625 -> 631 -0.14380  
625 -> 641 0.16375  
626 -> 630 0.14380  
626 -> 639 0.16375  
627 -> 638 0.12449

**Excited State 86: Singlet-?Sym 4.6642 eV 265.82 nm f=0.0371**  
**<S\*\*2>=0.000**

622 -> 634 -0.15441  
622 -> 635 0.12646  
623 -> 632 0.15427  
623 -> 636 -0.15441  
624 -> 632 0.19863  
624 -> 633 -0.10283  
624 -> 636 0.12646  
625 -> 640 -0.10718  
626 -> 629 -0.11492  
626 -> 640 -0.13086  
627 -> 631 0.11492  
627 -> 639 0.10718  
627 -> 641 0.13086

**Excited State 87: Singlet-?Sym 4.6642 eV 265.82 nm f=0.0371**  
**<S\*\*2>=0.000**

622 -> 634 -0.13612  
622 -> 635 -0.14617  
623 -> 632 -0.17832  
623 -> 633 -0.11417  
623 -> 636 -0.13612  
624 -> 632 0.17511  
624 -> 636 -0.14617

625 -> 629 -0.10879  
 625 -> 640 0.12388  
 626 -> 629 -0.10131  
 626 -> 637 0.10453  
 626 -> 640 -0.11536  
 627 -> 630 0.10879  
 627 -> 631 0.10131  
 627 -> 639 -0.12388  
 627 -> 641 0.11536  
**Excited State 88: Singlet-?Sym 4.6708 eV 265.45 nm f=0.0000 <S\*\*2>=0.000**  
**Excited State 89: Singlet-?Sym 4.6708 eV 265.45 nm f=0.0000 <S\*\*2>=0.000**  
**Excited State 90: Singlet-A2G 4.7008 eV 263.75 nm f=0.0000 <S\*\*2>=0.000**  
**Excited State 91: Singlet-T1G 4.7120 eV 263.12 nm f=0.0000 <S\*\*2>=0.000**  
**Excited State 92: Singlet-T1G 4.7120 eV 263.12 nm f=0.0000 <S\*\*2>=0.000**  
**Excited State 93: Singlet-T1G 4.7120 eV 263.12 nm f=0.0000 <S\*\*2>=0.000**  
**Excited State 94: Singlet-?Sym 4.7123 eV 263.11 nm f=0.0000 <S\*\*2>=0.000**  
**Excited State 95: Singlet-?Sym 4.7260 eV 262.35 nm f=0.0864**  
**<S\*\*2>=0.000**  
 576 -> 633 0.12052  
 578 -> 631 -0.14999  
 579 -> 629 0.14999  
 585 -> 633 -0.11489  
 591 -> 639 -0.10458  
 592 -> 630 0.16370  
 594 -> 632 0.14615  
 622 -> 634 0.11780  
 623 -> 636 0.11780  
 624 -> 632 -0.12036  
 625 -> 638 0.10455  
**Excited State 96: Singlet-?Sym 4.7260 eV 262.35 nm f=0.0864**  
**<S\*\*2>=0.000**  
 577 -> 629 -0.11337  
 578 -> 630 0.11337  
 591 -> 631 0.11691  
 593 -> 633 0.10785  
 595 -> 632 -0.10476  
**Excited State 97: Singlet-?Sym 4.7260 eV 262.35 nm f=0.0864**  
**<S\*\*2>=0.000**  
 575 -> 632 0.10260  
 577 -> 631 0.11352  
 579 -> 630 -0.11352  
 591 -> 631 -0.10127  
 593 -> 633 0.12443  
 622 -> 633 -0.10247  
**Excited State 98: Singlet-?Sym 4.7371 eV 261.73 nm f=0.0000 <S\*\*2>=0.000**  
**Excited State 99: Singlet-?Sym 4.7371 eV 261.73 nm f=0.0000 <S\*\*2>=0.000**

Excited State 100: Singlet-?Sym 4.7371 eV 261.73 nm f=0.0000 <S\*\*2>=0.000  
Excited State 101: Singlet-?Sym 4.7718 eV 259.83 nm f=0.0000 <S\*\*2>=0.000  
Excited State 102: Singlet-?Sym 4.7718 eV 259.83 nm f=0.0000 <S\*\*2>=0.000  
Excited State 103: Singlet-T2U 4.7945 eV 258.59 nm f=0.0000 <S\*\*2>=0.000  
Excited State 104: Singlet-T2U 4.7945 eV 258.59 nm f=0.0000 <S\*\*2>=0.000  
Excited State 105: Singlet-T2U 4.7945 eV 258.59 nm f=0.0000 <S\*\*2>=0.000  
Excited State 106: Singlet-?Sym 4.7986 eV 258.37 nm f=0.0000 <S\*\*2>=0.000  
Excited State 107: Singlet-?Sym 4.7986 eV 258.37 nm f=0.0000 <S\*\*2>=0.000  
Excited State 108: Singlet-?Sym 4.7986 eV 258.37 nm f=0.0000 <S\*\*2>=0.000  
**Excited State 109: Singlet-T1U 4.8178 eV 257.34 nm f=0.0189**

**<S\*\*2>=0.000**

566 -> 629 0.10202  
567 -> 631 -0.10202  
576 -> 633 -0.10698  
578 -> 641 -0.10375  
579 -> 640 0.10375  
585 -> 633 0.12888  
592 -> 630 -0.19401  
593 -> 634 0.13036  
594 -> 632 0.12479  
595 -> 636 -0.13036  
628 -> 651 0.24213

**Excited State 110: Singlet-T1U 4.8178 eV 257.34 nm f=0.0189**

**<S\*\*2>=0.000**

583 -> 633 -0.11205  
591 -> 631 -0.16805  
593 -> 635 -0.11951  
594 -> 636 -0.11951  
595 -> 632 -0.10850  
628 -> 649 0.22198

**Excited State 111: Singlet-T1U 4.8178 eV 257.34 nm f=0.0189**

**<S\*\*2>=0.000**

575 -> 632 -0.11032  
584 -> 632 0.13291  
591 -> 629 0.14002  
592 -> 629 0.11321  
593 -> 633 0.12869  
594 -> 634 0.11951  
595 -> 635 -0.11951  
628 -> 650 0.22198

Excited State 112: Singlet-T2G 4.8222 eV 257.11 nm f=0.0000 <S\*\*2>=0.000  
Excited State 113: Singlet-T2G 4.8222 eV 257.11 nm f=0.0000 <S\*\*2>=0.000  
Excited State 114: Singlet-T2G 4.8222 eV 257.11 nm f=0.0000 <S\*\*2>=0.000  
Excited State 115: Singlet-?Sym 4.8335 eV 256.51 nm f=0.0000 <S\*\*2>=0.000  
Excited State 116: Singlet-?Sym 4.8335 eV 256.51 nm f=0.0000 <S\*\*2>=0.000  
Excited State 117: Singlet-?Sym 4.8335 eV 256.51 nm f=0.0000 <S\*\*2>=0.000

Excited State 118: Singlet-?Sym 4.8434 eV 255.98 nm f=0.0000 <S\*\*2>=0.000  
Excited State 119: Singlet-?Sym 4.8434 eV 255.98 nm f=0.0000 <S\*\*2>=0.000  
Excited State 120: Singlet-?Sym 4.8475 eV 255.77 nm f=0.0000 <S\*\*2>=0.000  
Excited State 121: Singlet-?Sym 4.8475 eV 255.77 nm f=0.0000 <S\*\*2>=0.000  
Excited State 122: Singlet-?Sym 4.8475 eV 255.77 nm f=0.0000 <S\*\*2>=0.000

**Excited State 123: Singlet-?Sym 4.8498 eV 255.65 nm f=1.3910**

**<S\*\*2>=0.000**

615 -> 629 -0.11379  
616 -> 631 0.11379  
617 -> 634 -0.14125  
618 -> 633 -0.15818  
619 -> 636 0.14125  
620 -> 630 0.23080  
624 -> 632 0.27173  
624 -> 633 -0.14067  
625 -> 638 0.10622  
628 -> 651 0.23502

**Excited State 124: Singlet-?Sym 4.8498 eV 255.65 nm f=1.3910**

**<S\*\*2>=0.000**

614 -> 629 0.11394  
616 -> 630 0.11394  
617 -> 635 -0.14144  
618 -> 636 -0.14144  
619 -> 633 0.15021  
620 -> 631 0.23111  
623 -> 632 0.25804  
623 -> 633 0.16521  
626 -> 637 0.12799  
628 -> 649 0.23533

**Excited State 125: Singlet-?Sym 4.8498 eV 255.65 nm f=1.3910**

**<S\*\*2>=0.000**

614 -> 631 0.11398  
615 -> 630 -0.11398  
617 -> 632 -0.17824  
618 -> 634 -0.14149  
619 -> 635 -0.14149  
620 -> 629 0.23120  
622 -> 633 0.30618  
627 -> 638 -0.11536  
628 -> 650 0.23542

Excited State 126: Singlet-?Sym 4.8546 eV 255.40 nm f=0.0000 <S\*\*2>=0.000

Excited State 127: Singlet-?Sym 4.8546 eV 255.40 nm f=0.0000 <S\*\*2>=0.000

Excited State 128: Singlet-T2G 4.8910 eV 253.50 nm f=0.0000 <S\*\*2>=0.000

Excited State 129: Singlet-T2G 4.8910 eV 253.50 nm f=0.0000 <S\*\*2>=0.000

Excited State 130: Singlet-T2G 4.8910 eV 253.50 nm f=0.0000 <S\*\*2>=0.000

**Excited State 131: Singlet-T1U 4.9177 eV 252.12 nm f=2.6855**

**<S\*\*2>=0.000**

612 -> 630 0.12949  
614 -> 637 0.14610  
617 -> 634 0.15366  
619 -> 636 -0.15366  
620 -> 630 -0.20534  
628 -> 651 0.22693

**Excited State 132: Singlet-T1U 4.9177 eV 252.12 nm f=2.6855**

**<S\*\*2>=0.000**

615 -> 638 -0.11715  
616 -> 637 -0.11812  
617 -> 635 -0.10239  
618 -> 634 0.11458  
618 -> 636 -0.10239  
619 -> 635 0.11458  
620 -> 629 -0.15312  
620 -> 631 0.13683  
628 -> 649 -0.15122  
628 -> 650 0.16922

**Excited State 133: Singlet-T1U 4.9177 eV 252.12 nm f=2.6855**

**<S\*\*2>=0.000**

615 -> 638 0.13113  
616 -> 637 -0.10554  
617 -> 635 0.11461  
618 -> 634 0.10238  
618 -> 636 0.11461  
619 -> 635 0.10239  
620 -> 629 -0.13682  
620 -> 631 -0.15316  
628 -> 649 0.16927  
628 -> 650 0.15121

Excited State 134: Singlet-?Sym 4.9250 eV 251.75 nm f=0.0000 <S\*\*2>=0.000

Excited State 135: Singlet-?Sym 4.9250 eV 251.75 nm f=0.0000 <S\*\*2>=0.000

Excited State 136: Singlet-?Sym 4.9250 eV 251.75 nm f=0.0000 <S\*\*2>=0.000

Excited State 137: Singlet-?Sym 4.9370 eV 251.13 nm f=0.0000 <S\*\*2>=0.000

Excited State 138: Singlet-?Sym 4.9370 eV 251.13 nm f=0.0000 <S\*\*2>=0.000

Excited State 139: Singlet-?Sym 4.9370 eV 251.13 nm f=0.0000 <S\*\*2>=0.000

Excited State 140: Singlet-?Sym 4.9500 eV 250.47 nm f=0.0000 <S\*\*2>=0.000

Cage01\_LC-wPBE\_TDDFT

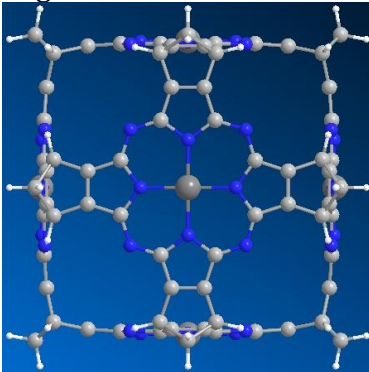

Excited State 1: Singlet-T1G 2.0816 eV 595.62 nm f=0.0000  $\langle S^2 \rangle = 0.000$   
Excited State 2: Singlet-T1G 2.0816 eV 595.62 nm f=0.0000  $\langle S^2 \rangle = 0.000$   
Excited State 3: Singlet-T1G 2.0816 eV 595.62 nm f=0.0000  $\langle S^2 \rangle = 0.000$   
Excited State 4: Singlet-T2U 2.1717 eV 570.90 nm f=0.0000  $\langle S^2 \rangle = 0.000$   
Excited State 5: Singlet-T2U 2.1717 eV 570.90 nm f=0.0000  $\langle S^2 \rangle = 0.000$   
Excited State 6: Singlet-T2U 2.1717 eV 570.90 nm f=0.0000  $\langle S^2 \rangle = 0.000$   
**Excited State 7: Singlet-?Sym 2.2603 eV 548.52 nm f=0.5552**  
 **$\langle S^2 \rangle = 0.000$**   
663 -> 681 -0.11272  
672 -> 690 -0.11715  
673 -> 683 0.24577  
674 -> 684 -0.14384  
674 -> 686 -0.13325  
675 -> 679 0.19303  
675 -> 688 0.16165  
676 -> 679 0.11647  
677 -> 680 -0.19303  
677 -> 681 -0.11647



677 -> 689 -0.16165  
678 -> 686 -0.20905  
678 -> 687 -0.12613

**Excited State 8: Singlet-?Sym 2.2603 eV 548.52 nm f=0.5552**

**<S\*\*2>=0.000**

663 -> 680 -0.12044  
673 -> 683 0.11869  
673 -> 687 -0.13810  
674 -> 684 0.25472  
676 -> 679 -0.20625  
676 -> 688 0.17272  
677 -> 681 0.20625  
677 -> 690 0.17272  
678 -> 686 -0.10096  
678 -> 687 0.22337

**Excited State 9: Singlet-T1U 2.2603 eV 548.52 nm f=0.5552**

**<S\*\*2>=0.000**

663 -> 679 -0.12387  
671 -> 688 0.12737  
673 -> 682 -0.18368  
673 -> 683 0.13419  
673 -> 685 -0.11159  
674 -> 682 -0.20582  
675 -> 679 0.10539  
675 -> 681 -0.21212  
675 -> 690 0.17764  
676 -> 680 0.21212  
676 -> 689 -0.17764  
677 -> 680 -0.10539  
678 -> 685 -0.22973  
678 -> 686 -0.11413

Excited State 10: Singlet-?Sym 2.2907 eV 541.25 nm f=0.0000 <S\*\*2>=0.000

Excited State 11: Singlet-?Sym 2.2907 eV 541.25 nm f=0.0000 <S\*\*2>=0.000

Excited State 12: Singlet-?Sym 2.2907 eV 541.25 nm f=0.0000 <S\*\*2>=0.000

Excited State 13: Singlet-?Sym 3.2096 eV 386.29 nm f=0.0000 <S\*\*2>=0.000

Excited State 14: Singlet-?Sym 3.2096 eV 386.29 nm f=0.0000 <S\*\*2>=0.000

Excited State 15: Singlet-?Sym 3.2096 eV 386.29 nm f=0.0000 <S\*\*2>=0.000

**Excited State 16: Singlet-?Sym 3.2100 eV 386.25 nm f=0.0001**

**<S\*\*2>=0.000**

651 -> 689 0.14405  
651 -> 690 0.16785  
655 -> 682 0.13485  
655 -> 685 -0.12621  
656 -> 682 0.15714  
656 -> 685 0.14708  
657 -> 683 0.13487

657 -> 684 0.15713  
657 -> 686 0.12623  
657 -> 687 0.14707  
658 -> 680 0.18913  
658 -> 690 0.12722  
659 -> 680 0.10880  
659 -> 681 0.25424  
667 -> 690 -0.10026

**Excited State 17: Singlet-?Sym 3.2100 eV 386.25 nm f=0.0001  
<S\*\*2>=0.000**

651 -> 689 -0.15433  
651 -> 690 0.15625  
655 -> 682 -0.14448  
655 -> 685 0.13523  
656 -> 682 0.14628  
656 -> 685 0.13692  
657 -> 683 -0.14449  
657 -> 684 0.14627  
657 -> 686 -0.13524  
657 -> 687 0.13690  
658 -> 680 -0.20263  
658 -> 690 0.11842  
659 -> 680 -0.11657  
659 -> 681 0.23667  
659 -> 689 -0.10140

**Excited State 18: Singlet-?Sym 3.2100 eV 386.25 nm f=0.0001  
<S\*\*2>=0.000**

651 -> 688 -0.21111  
655 -> 684 -0.19763  
655 -> 687 0.18498  
656 -> 683 0.19765  
656 -> 686 -0.18499  
658 -> 679 -0.27667  
658 -> 680 0.11756  
659 -> 679 0.16033  
659 -> 688 0.13845  
664 -> 684 0.11044  
664 -> 687 -0.10340  
665 -> 683 0.11045  
665 -> 686 -0.10341  
667 -> 688 0.12611

Excited State 19: Singlet-?Sym 3.2101 eV 386.23 nm f=0.0000 <S\*\*2>=0.000  
Excited State 20: Singlet-?Sym 3.2101 eV 386.23 nm f=0.0000 <S\*\*2>=0.000  
Excited State 21: Singlet-?Sym 3.2101 eV 386.23 nm f=0.0000 <S\*\*2>=0.000  
Excited State 22: Singlet-?Sym 3.2105 eV 386.18 nm f=0.0000 <S\*\*2>=0.000  
Excited State 23: Singlet-?Sym 3.2105 eV 386.18 nm f=0.0000 <S\*\*2>=0.000

Excited State 24: Singlet-?Sym 3.2105 eV 386.18 nm f=0.0000 <S\*\*2>=0.000  
 Excited State 25: Singlet-?Sym 3.3681 eV 368.11 nm f=0.0000 <S\*\*2>=0.000  
 Excited State 26: Singlet-?Sym 3.4037 eV 364.27 nm f=0.0000 <S\*\*2>=0.000  
 Excited State 27: Singlet-?Sym 3.4037 eV 364.27 nm f=0.0000 <S\*\*2>=0.000  
 Excited State 28: Singlet-?Sym 3.4080 eV 363.80 nm f=0.0000 <S\*\*2>=0.000  
 Excited State 29: Singlet-?Sym 3.4080 eV 363.80 nm f=0.0000 <S\*\*2>=0.000  
 Excited State 30: Singlet-?Sym 3.4080 eV 363.80 nm f=0.0000 <S\*\*2>=0.000  
 Excited State 31: Singlet-?Sym 3.4401 eV 360.41 nm f=0.0000 <S\*\*2>=0.000  
 Excited State 32: Singlet-?Sym 3.4401 eV 360.41 nm f=0.0000 <S\*\*2>=0.000  
 Excited State 33: Singlet-?Sym 3.4401 eV 360.41 nm f=0.0000 <S\*\*2>=0.000  
 Excited State 34: Singlet-T2U 3.4644 eV 357.88 nm f=0.0000 <S\*\*2>=0.000  
 Excited State 35: Singlet-T2U 3.4644 eV 357.88 nm f=0.0000 <S\*\*2>=0.000  
 Excited State 36: Singlet-T2U 3.4644 eV 357.88 nm f=0.0000 <S\*\*2>=0.000  
 Excited State 37: Singlet-?Sym 3.6307 eV 341.49 nm f=0.0000 <S\*\*2>=0.000  
 Excited State 38: Singlet-?Sym 3.6307 eV 341.49 nm f=0.0000 <S\*\*2>=0.000  
 Excited State 39: Singlet-T1G 3.6352 eV 341.07 nm f=0.0000 <S\*\*2>=0.000  
 Excited State 40: Singlet-T1G 3.6352 eV 341.07 nm f=0.0000 <S\*\*2>=0.000  
 Excited State 41: Singlet-T1G 3.6352 eV 341.07 nm f=0.0000 <S\*\*2>=0.000  
 Excited State 42: Singlet-?Sym 3.6650 eV 338.30 nm f=0.0000 <S\*\*2>=0.000  
 Excited State 43: Singlet-T2G 3.6928 eV 335.74 nm f=0.0000 <S\*\*2>=0.000  
 Excited State 44: Singlet-T2G 3.6928 eV 335.74 nm f=0.0000 <S\*\*2>=0.000  
 Excited State 45: Singlet-T2G 3.6928 eV 335.74 nm f=0.0000 <S\*\*2>=0.000

**Excited State 46: Singlet-T1U 3.7090 eV 334.28 nm f=0.1376**  
**<S\*\*2>=0.000**

632 -> 679 0.12156  
 649 -> 688 0.16601  
 649 -> 689 0.10398  
 650 -> 689 -0.10970  
 664 -> 684 -0.10725  
 664 -> 687 0.10836  
 665 -> 683 -0.10725  
 665 -> 686 0.10836  
 667 -> 688 -0.18378  
 667 -> 689 0.16273

**Excited State 47: Singlet-T1U 3.7090 eV 334.28 nm f=0.1376**  
**<S\*\*2>=0.000**

632 -> 679 -0.10314  
 633 -> 681 0.10869  
 649 -> 688 -0.14085  
 650 -> 690 -0.15723  
 665 -> 682 0.10306  
 665 -> 685 0.10412  
 666 -> 684 0.10306  
 666 -> 687 0.10412  
 667 -> 688 0.15593  
 667 -> 690 -0.17658

**Excited State 48: Singlet-T1U 3.7090 eV 334.28 nm f=0.1376**

**<S\*\*2>=0.000**

633 -> 681 -0.10495  
649 -> 689 0.10884  
650 -> 689 -0.11483  
650 -> 690 0.15183  
664 -> 685 -0.10043  
665 -> 685 -0.10053  
666 -> 686 -0.10043  
666 -> 687 -0.10054  
667 -> 689 0.17034  
667 -> 690 0.17050

Excited State 49: Singlet-?Sym 3.8336 eV 323.41 nm f=0.0000 <S\*\*2>=0.000

Excited State 50: Singlet-?Sym 3.8336 eV 323.41 nm f=0.0000 <S\*\*2>=0.000

Excited State 51: Singlet-T1G 3.8336 eV 323.41 nm f=0.0000 <S\*\*2>=0.000

Excited State 52: Singlet-?Sym 3.8512 eV 321.94 nm f=0.0000 <S\*\*2>=0.000

Excited State 53: Singlet-?Sym 3.8512 eV 321.94 nm f=0.0000 <S\*\*2>=0.000

Excited State 54: Singlet-?Sym 3.8512 eV 321.94 nm f=0.0000 <S\*\*2>=0.000

Excited State 55: Singlet-?Sym 3.8548 eV 321.64 nm f=0.0000 <S\*\*2>=0.000

Excited State 56: Singlet-?Sym 3.8548 eV 321.64 nm f=0.0000 <S\*\*2>=0.000

Excited State 57: Singlet-?Sym 3.8548 eV 321.64 nm f=0.0000 <S\*\*2>=0.000

**Excited State 58: Singlet-?Sym 3.8622 eV 321.02 nm f=0.0026**

**<S\*\*2>=0.000**

640 -> 682 -0.22809  
640 -> 684 -0.13065  
644 -> 681 0.20062  
644 -> 690 -0.17700  
645 -> 679 0.11492  
645 -> 680 0.20062  
645 -> 688 -0.10139  
645 -> 689 -0.17700  
646 -> 681 -0.11492  
646 -> 690 -0.10139  
647 -> 685 0.23307  
648 -> 682 -0.14289  
648 -> 685 0.13868  
648 -> 687 0.15534

**Excited State 59: Singlet-?Sym 3.8622 eV 321.02 nm f=0.0026**

**<S\*\*2>=0.000**

640 -> 682 0.13059  
640 -> 683 0.14867  
640 -> 684 -0.17842  
644 -> 679 -0.13077  
644 -> 681 -0.11486  
644 -> 688 -0.11537  
644 -> 690 0.10134

645 -> 679 0.15693  
645 -> 680 -0.11486  
645 -> 688 -0.13846  
645 -> 689 0.10134  
646 -> 680 0.13077  
646 -> 681 -0.15693  
646 -> 689 0.11538  
646 -> 690 -0.13846  
647 -> 684 -0.13005  
647 -> 685 -0.13344  
647 -> 686 0.15425  
648 -> 687 0.21214

**Excited State 60: Singlet-?Sym 3.8622 eV 321.02 nm f=0.0026  
<S\*\*2>=0.000**

640 -> 683 0.21677  
640 -> 684 0.14861  
644 -> 679 -0.19067  
644 -> 688 -0.16822  
645 -> 679 -0.13071  
645 -> 688 0.11533  
646 -> 680 0.19066  
646 -> 681 0.13072  
646 -> 689 0.16822  
646 -> 690 0.11533  
647 -> 684 0.10833  
647 -> 686 0.22490  
648 -> 683 -0.13788  
648 -> 686 -0.12593  
648 -> 687 -0.17670

Excited State 61: Singlet-?Sym 3.8635 eV 320.91 nm f=0.0000 <S\*\*2>=0.000  
Excited State 62: Singlet-T2G 3.8635 eV 320.91 nm f=0.0000 <S\*\*2>=0.000  
Excited State 63: Singlet-T2G 3.8635 eV 320.91 nm f=0.0000 <S\*\*2>=0.000  
Excited State 64: Singlet-T2U 3.8819 eV 319.39 nm f=0.0000 <S\*\*2>=0.000  
Excited State 65: Singlet-T2U 3.8819 eV 319.39 nm f=0.0000 <S\*\*2>=0.000  
Excited State 66: Singlet-T2U 3.8819 eV 319.39 nm f=0.0000 <S\*\*2>=0.000  
Excited State 67: Singlet-?Sym 3.9661 eV 312.61 nm f=0.0000 <S\*\*2>=0.000  
Excited State 68: Singlet-?Sym 3.9783 eV 311.65 nm f=0.0000 <S\*\*2>=0.000  
Excited State 69: Singlet-?Sym 3.9783 eV 311.65 nm f=0.0000 <S\*\*2>=0.000  
Excited State 70: Singlet-T2U 3.9997 eV 309.98 nm f=0.0000 <S\*\*2>=0.000  
Excited State 71: Singlet-T2U 3.9997 eV 309.98 nm f=0.0000 <S\*\*2>=0.000  
Excited State 72: Singlet-T2U 3.9997 eV 309.98 nm f=0.0000 <S\*\*2>=0.000  
Excited State 73: Singlet-T1G 4.0131 eV 308.95 nm f=0.0000 <S\*\*2>=0.000  
Excited State 74: Singlet-T1G 4.0131 eV 308.95 nm f=0.0000 <S\*\*2>=0.000  
Excited State 75: Singlet-T1G 4.0131 eV 308.95 nm f=0.0000 <S\*\*2>=0.000

**Excited State 76: Singlet-?Sym 4.0429 eV 306.67 nm f=0.0604  
<S\*\*2>=0.000**

675 -> 679 -0.25258  
675 -> 681 -0.15897  
675 -> 688 0.18799  
675 -> 690 -0.11832  
676 -> 680 0.15897  
676 -> 689 0.11831  
677 -> 680 0.25258  
677 -> 689 -0.18799  
678 -> 686 -0.10857

**Excited State 77: Singlet-?Sym 4.0429 eV 306.67 nm f=0.0604  
<S\*\*2>=0.000**

676 -> 679 0.29296  
676 -> 688 0.21805  
677 -> 681 -0.29296  
677 -> 690 0.21805  
678 -> 687 0.12592

**Excited State 78: Singlet-?Sym 4.0429 eV 306.67 nm f=0.0604  
<S\*\*2>=0.000**

675 -> 679 -0.16299  
675 -> 681 0.24608  
675 -> 688 0.12132  
675 -> 690 0.18315  
676 -> 680 -0.24608  
676 -> 689 -0.18315  
677 -> 680 0.16299  
677 -> 689 -0.12131  
678 -> 685 -0.10577

Excited State 79: Singlet-?Sym 4.0577 eV 305.55 nm f=0.0000 <S\*\*2>=0.000

Excited State 80: Singlet-?Sym 4.0577 eV 305.55 nm f=0.0000 <S\*\*2>=0.000

Excited State 81: Singlet-?Sym 4.0611 eV 305.29 nm f=0.0000 <S\*\*2>=0.000

Excited State 82: Singlet-?Sym 4.0765 eV 304.14 nm f=0.0000 <S\*\*2>=0.000

Excited State 83: Singlet-?Sym 4.0765 eV 304.14 nm f=0.0000 <S\*\*2>=0.000

Excited State 84: Singlet-T2G 4.0765 eV 304.14 nm f=0.0000 <S\*\*2>=0.000

Excited State 85: Singlet-?Sym 4.0832 eV 303.65 nm f=0.0000 <S\*\*2>=0.000

Excited State 86: Singlet-?Sym 4.0888 eV 303.23 nm f=0.0000 <S\*\*2>=0.000

Excited State 87: Singlet-?Sym 4.0888 eV 303.23 nm f=0.0000 <S\*\*2>=0.000

**Excited State 88: Singlet-T1U 4.1077 eV 301.83 nm f=0.0803**

**<S\*\*2>=0.000**

673 -> 685 -0.12767  
674 -> 682 -0.10745  
674 -> 685 0.11393  
675 -> 681 -0.12271  
676 -> 680 0.12271  
678 -> 685 0.33872  
678 -> 686 -0.17919  
678 -> 687 -0.11202

**Excited State 89: Singlet-T1U 4.1077 eV 301.83 nm f=0.0803**

**<S\*\*2>=0.000**

673 -> 683 0.14847  
674 -> 686 -0.17641  
675 -> 679 0.12922  
677 -> 680 -0.12922  
678 -> 685 0.17293  
678 -> 686 0.35667

**Excited State 90: Singlet-T1U 4.1077 eV 301.83 nm f=0.0803**

**<S\*\*2>=0.000**

625 -> 681 0.10206  
626 -> 679 0.10206  
647 -> 693 -0.10223  
673 -> 687 0.18242  
674 -> 684 -0.15352  
676 -> 679 0.13775  
677 -> 681 -0.13775  
678 -> 685 0.12147  
678 -> 687 0.38022

Excited State 91: Singlet-?Sym 4.1237 eV 300.66 nm f=0.0000 <S\*\*2>=0.000

Excited State 92: Singlet-?Sym 4.1238 eV 300.66 nm f=0.0000 <S\*\*2>=0.000

Excited State 93: Singlet-?Sym 4.1238 eV 300.66 nm f=0.0000 <S\*\*2>=0.000

**Excited State 94: Singlet-T1U 4.1318 eV 300.07 nm f=0.2495**

**<S\*\*2>=0.000**

673 -> 685 0.11683  
673 -> 687 0.11137  
674 -> 685 -0.10425  
674 -> 686 -0.13640  
675 -> 679 -0.11415  
675 -> 681 -0.12829  
676 -> 680 0.12828  
677 -> 680 0.11414  
678 -> 685 -0.25678  
678 -> 686 0.22847  
678 -> 687 0.19232

**Excited State 95: Singlet-T1U 4.1318 eV 300.07 nm f=0.2495**

**<S\*\*2>=0.000**

673 -> 683 0.13785  
674 -> 686 -0.19098  
675 -> 679 -0.15983  
675 -> 688 0.12102  
677 -> 680 0.15983  
677 -> 689 -0.12102  
678 -> 685 0.16460  
678 -> 686 0.31991  
678 -> 687 -0.16027

**Excited State 96: Singlet-T1U 4.1318 eV 300.07 nm f=0.2495**

**<S\*\*2>=0.000**

673 -> 685 -0.11337  
673 -> 687 0.17607  
674 -> 684 -0.12708  
674 -> 685 0.10117  
675 -> 681 0.12449  
676 -> 679 -0.15191  
676 -> 680 -0.12449  
676 -> 688 -0.11502  
677 -> 681 0.15191  
677 -> 690 -0.11502  
678 -> 685 0.24918  
678 -> 687 0.30405

Excited State 97: Singlet-?Sym 4.1623 eV 297.88 nm f=0.0000 <S\*\*2>=0.000  
Excited State 98: Singlet-?Sym 4.1623 eV 297.88 nm f=0.0000 <S\*\*2>=0.000  
Excited State 99: Singlet-?Sym 4.1623 eV 297.88 nm f=0.0000 <S\*\*2>=0.000  
Excited State 100: Singlet-?Sym 4.1710 eV 297.26 nm f=0.0000 <S\*\*2>=0.000  
Excited State 101: Singlet-?Sym 4.1710 eV 297.26 nm f=0.0000 <S\*\*2>=0.000  
Excited State 102: Singlet-?Sym 4.1788 eV 296.70 nm f=0.0000 <S\*\*2>=0.000  
Excited State 103: Singlet-?Sym 4.1943 eV 295.60 nm f=0.0000 <S\*\*2>=0.000  
Excited State 104: Singlet-?Sym 4.1943 eV 295.60 nm f=0.0000 <S\*\*2>=0.000  
Excited State 105: Singlet-?Sym 4.1943 eV 295.60 nm f=0.0000 <S\*\*2>=0.000  
Excited State 106: Singlet-?Sym 4.2202 eV 293.79 nm f=0.0000 <S\*\*2>=0.000  
Excited State 107: Singlet-?Sym 4.2202 eV 293.79 nm f=0.0000 <S\*\*2>=0.000  
Excited State 108: Singlet-?Sym 4.2202 eV 293.79 nm f=0.0000 <S\*\*2>=0.000  
Excited State 109: Singlet-?Sym 4.2335 eV 292.87 nm f=0.0000 <S\*\*2>=0.000  
Excited State 110: Singlet-?Sym 4.2335 eV 292.87 nm f=0.0000 <S\*\*2>=0.000  
Excited State 111: Singlet-?Sym 4.2335 eV 292.87 nm f=0.0000 <S\*\*2>=0.000  
Excited State 112: Singlet-?Sym 4.2348 eV 292.77 nm f=0.0000 <S\*\*2>=0.000  
Excited State 113: Singlet-?Sym 4.2434 eV 292.18 nm f=0.0000 <S\*\*2>=0.000  
Excited State 114: Singlet-?Sym 4.2434 eV 292.18 nm f=0.0000 <S\*\*2>=0.000  
Excited State 115: Singlet-?Sym 4.2678 eV 290.51 nm f=0.0000 <S\*\*2>=0.000  
Excited State 116: Singlet-?Sym 4.2678 eV 290.51 nm f=0.0000 <S\*\*2>=0.000  
Excited State 117: Singlet-?Sym 4.2678 eV 290.51 nm f=0.0000 <S\*\*2>=0.000

**Excited State 118: Singlet-?Sym 4.2708 eV 290.31 nm f=0.1070**

**<S\*\*2>=0.000**

673 -> 682 -0.20439  
673 -> 683 -0.17081  
673 -> 685 0.24316  
673 -> 687 0.30816  
674 -> 682 -0.22903  
674 -> 684 0.29027  
674 -> 685 -0.21700  
674 -> 686 -0.18134  
674 -> 687 0.10164



**Excited State 119: Singlet-?Sym 4.2708 eV 290.31 nm f=0.1071**  
**<S\*\*2>=0.000**

673 -> 683 0.41340  
673 -> 687 0.19553  
674 -> 684 0.18417  
674 -> 686 0.43888

**Excited State 120: Singlet-?Sym 4.2708 eV 290.31 nm f=0.1070**  
**<S\*\*2>=0.000**

673 -> 682 -0.23224  
673 -> 685 0.27629  
673 -> 687 -0.29749  
674 -> 682 -0.26024  
674 -> 684 -0.28022  
674 -> 685 -0.24656  
674 -> 686 0.10061

Excited State 121: Singlet-?Sym 4.2866 eV 289.24 nm f=0.0000 <S\*\*2>=0.000

Excited State 122: Singlet-?Sym 4.3274 eV 286.51 nm f=0.0000 <S\*\*2>=0.000

Excited State 123: Singlet-?Sym 4.3274 eV 286.51 nm f=0.0000 <S\*\*2>=0.000

Excited State 124: Singlet-?Sym 4.3274 eV 286.51 nm f=0.0000 <S\*\*2>=0.000

Excited State 125: Singlet-?Sym 4.3305 eV 286.31 nm f=0.0000 <S\*\*2>=0.000

Excited State 126: Singlet-?Sym 4.3305 eV 286.31 nm f=0.0000 <S\*\*2>=0.000

**Excited State 127: Singlet-T1U 4.3306 eV 286.30 nm f=3.4233**  
**<S\*\*2>=0.000**

663 -> 680 0.22695  
669 -> 682 0.21730  
669 -> 685 -0.14604  
670 -> 683 0.21730  
670 -> 686 0.14604  
671 -> 689 -0.18438  
672 -> 680 0.10339  
672 -> 689 0.17716  
673 -> 687 -0.19429  
674 -> 684 0.10437  
676 -> 688 0.17934  
677 -> 690 0.17934  
678 -> 687 0.15471

**Excited State 128: Singlet-?Sym 4.3306 eV 286.30 nm f=3.4236**  
**<S\*\*2>=0.000**

663 -> 681 0.21962  
668 -> 682 0.21029  
668 -> 685 0.14134  
670 -> 684 0.21029  
670 -> 687 0.14133  
671 -> 681 -0.13473  
672 -> 690 0.24025  
673 -> 683 0.10412

674 -> 686 -0.19383  
675 -> 688 0.17356  
677 -> 689 -0.17356  
678 -> 686 -0.14972

**Excited State 129: Singlet-?Sym 4.3306 eV 286.30 nm f=3.4234  
<S\*\*2>=0.000**

663 -> 679 -0.21789  
668 -> 683 -0.20865  
668 -> 686 0.14021  
669 -> 684 -0.20865  
669 -> 687 0.14021  
671 -> 688 0.23583  
672 -> 679 0.13225  
673 -> 685 0.14655  
674 -> 685 -0.13078  
675 -> 690 -0.17219  
676 -> 689 0.17219  
678 -> 685 0.14855

Excited State 130: Singlet-T2G 4.3412 eV 285.60 nm f=0.0000 <S\*\*2>=0.000  
Excited State 131: Singlet-T2G 4.3412 eV 285.60 nm f=0.0000 <S\*\*2>=0.000  
Excited State 132: Singlet-T2G 4.3412 eV 285.60 nm f=0.0000 <S\*\*2>=0.000  
Excited State 133: Singlet-?Sym 4.4023 eV 281.64 nm f=0.0000 <S\*\*2>=0.000  
Excited State 134: Singlet-?Sym 4.4023 eV 281.64 nm f=0.0000 <S\*\*2>=0.000  
Excited State 135: Singlet-?Sym 4.4108 eV 281.09 nm f=0.0000 <S\*\*2>=0.000  
Excited State 136: Singlet-?Sym 4.4163 eV 280.74 nm f=0.0000 <S\*\*2>=0.000  
Excited State 137: Singlet-?Sym 4.4163 eV 280.74 nm f=0.0000 <S\*\*2>=0.000  
Excited State 138: Singlet-?Sym 4.4163 eV 280.74 nm f=0.0000 <S\*\*2>=0.000  
Excited State 139: Singlet-?Sym 4.4542 eV 278.36 nm f=0.0000 <S\*\*2>=0.000  
Excited State 140: Singlet-?Sym 4.4542 eV 278.36 nm f=0.0000 <S\*\*2>=0.000

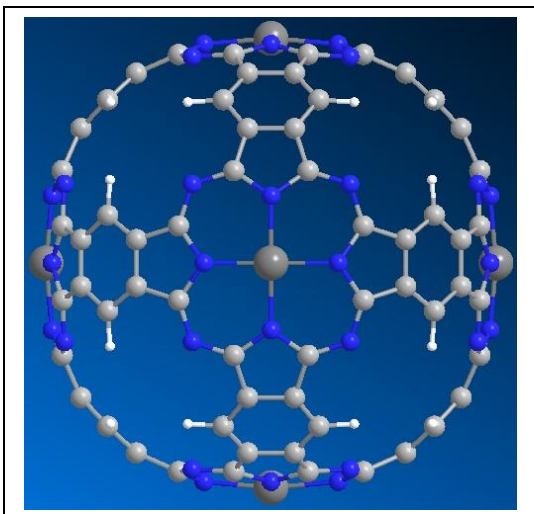

Excited State 1: Singlet-?Sym 1.1191 eV 1107.84 nm f=0.0000 <S\*\*2>=0.000  
 Excited State 2: Singlet-?Sym 1.1191 eV 1107.84 nm f=0.0000 <S\*\*2>=0.000  
 Excited State 3: Singlet-?Sym 1.1191 eV 1107.84 nm f=0.0000 <S\*\*2>=0.000  
 Excited State 4: Singlet-?Sym 1.6063 eV 771.89 nm f=0.0000 <S\*\*2>=0.000  
 Excited State 5: Singlet-?Sym 1.6063 eV 771.89 nm f=0.0000 <S\*\*2>=0.000  
 Excited State 6: Singlet-?Sym 1.6063 eV 771.89 nm f=0.0000 <S\*\*2>=0.000  
**Excited State 7: Singlet-?Sym 1.8072 eV 686.07 nm f=1.0569**  
**<S\*\*2>=0.000**

|            |          |
|------------|----------|
| 626 -> 631 | 0.16492  |
| 627 -> 631 | -0.20537 |
| 628 -> 632 | -0.16492 |
| 628 -> 633 | -0.20537 |
| 629 -> 635 | 0.14531  |
| 629 -> 636 | 0.30039  |
| 630 -> 634 | -0.29888 |
| 630 -> 636 | -0.22405 |

**Excited State 8: Singlet-?Sym 1.8072 eV 686.07 nm f=1.0569**  
**<S\*\*2>=0.000**

|            |          |
|------------|----------|
| 623 -> 631 | 0.11002  |
| 625 -> 638 | -0.10748 |
| 626 -> 633 | 0.26215  |
| 626 -> 642 | -0.11360 |
| 627 -> 632 | -0.26215 |
| 627 -> 641 | 0.11360  |
| 629 -> 635 | 0.43941  |
| 630 -> 634 | 0.13584  |
| 630 -> 635 | 0.18908  |

**Excited State 9: Singlet-?Sym 1.8072 eV 686.07 nm f=1.0569**  
**<S\*\*2>=0.000**

|            |          |
|------------|----------|
| 626 -> 631 | -0.20993 |
| 627 -> 631 | -0.17936 |
| 628 -> 632 | 0.20993  |
| 628 -> 633 | -0.17936 |
| 629 -> 636 | 0.26234  |
| 630 -> 634 | 0.38044  |

|                          |                           |                  |                  |                 |              |  |
|--------------------------|---------------------------|------------------|------------------|-----------------|--------------|--|
|                          | 630 -> 636                | -0.19567         |                  |                 |              |  |
| Excited State 10:        | Singlet-?Sym              | 1.8647 eV        | 664.92 nm        | f=0.0000        | <S**2>=0.000 |  |
| Excited State 11:        | Singlet-?Sym              | 1.8647 eV        | 664.92 nm        | f=0.0000        | <S**2>=0.000 |  |
| Excited State 12:        | Singlet-?Sym              | 1.8647 eV        | 664.92 nm        | f=0.0000        | <S**2>=0.000 |  |
| Excited State 13:        | Singlet-?Sym              | 2.5611 eV        | 484.10 nm        | f=0.0000        | <S**2>=0.000 |  |
| Excited State 14:        | Singlet-?Sym              | 2.5611 eV        | 484.10 nm        | f=0.0000        | <S**2>=0.000 |  |
| Excited State 15:        | Singlet-?Sym              | 2.5611 eV        | 484.10 nm        | f=0.0000        | <S**2>=0.000 |  |
| Excited State 16:        | Singlet-?Sym              | 2.5951 eV        | 477.76 nm        | f=0.0000        | <S**2>=0.000 |  |
| Excited State 17:        | Singlet-?Sym              | 2.5951 eV        | 477.76 nm        | f=0.0000        | <S**2>=0.000 |  |
| Excited State 18:        | Singlet-?Sym              | 2.5951 eV        | 477.76 nm        | f=0.0000        | <S**2>=0.000 |  |
| Excited State 19:        | Singlet-?Sym              | 2.7366 eV        | 453.06 nm        | f=0.0000        | <S**2>=0.000 |  |
| Excited State 20:        | Singlet-?Sym              | 2.7366 eV        | 453.06 nm        | f=0.0000        | <S**2>=0.000 |  |
| Excited State 21:        | Singlet-?Sym              | 2.7753 eV        | 446.74 nm        | f=0.0000        | <S**2>=0.000 |  |
| Excited State 22:        | Singlet-?Sym              | 2.8294 eV        | 438.20 nm        | f=0.0000        | <S**2>=0.000 |  |
| <b>Excited State 23:</b> | <b>Singlet-?Sym</b>       | <b>2.9327 eV</b> | <b>422.76 nm</b> | <b>f=0.2196</b> |              |  |
|                          | <b>&lt;S**2&gt;=0.000</b> |                  |                  |                 |              |  |
|                          | 627 -> 631                | 0.29952          |                  |                 |              |  |
|                          | 628 -> 633                | 0.29952          |                  |                 |              |  |
|                          | 629 -> 635                | 0.12738          |                  |                 |              |  |
|                          | 629 -> 636                | 0.33382          |                  |                 |              |  |
|                          | 629 -> 639                | 0.14686          |                  |                 |              |  |
|                          | 630 -> 634                | 0.10188          |                  |                 |              |  |
|                          | 630 -> 636                | -0.24899         |                  |                 |              |  |
|                          | 630 -> 639                | 0.19689          |                  |                 |              |  |
| <b>Excited State 24:</b> | <b>Singlet-?Sym</b>       | <b>2.9327 eV</b> | <b>422.76 nm</b> | <b>f=0.2196</b> |              |  |
|                          | <b>&lt;S**2&gt;=0.000</b> |                  |                  |                 |              |  |
|                          | 626 -> 633                | -0.30763         |                  |                 |              |  |
|                          | 627 -> 631                | -0.10232         |                  |                 |              |  |
|                          | 627 -> 632                | 0.30763          |                  |                 |              |  |
|                          | 628 -> 633                | -0.10232         |                  |                 |              |  |
|                          | 629 -> 635                | 0.39289          |                  |                 |              |  |
|                          | 629 -> 636                | -0.11404         |                  |                 |              |  |
|                          | 630 -> 635                | 0.16906          |                  |                 |              |  |
|                          | 630 -> 638                | -0.23173         |                  |                 |              |  |
| <b>Excited State 25:</b> | <b>Singlet-?Sym</b>       | <b>2.9327 eV</b> | <b>422.76 nm</b> | <b>f=0.2196</b> |              |  |
|                          | <b>&lt;S**2&gt;=0.000</b> |                  |                  |                 |              |  |
|                          | 626 -> 631                | 0.31569          |                  |                 |              |  |
|                          | 628 -> 632                | -0.31569         |                  |                 |              |  |
|                          | 629 -> 637                | 0.25711          |                  |                 |              |  |
|                          | 630 -> 634                | 0.43592          |                  |                 |              |  |
| Excited State 26:        | Singlet-?Sym              | 2.9365 eV        | 422.21 nm        | f=0.0000        | <S**2>=0.000 |  |
| Excited State 27:        | Singlet-?Sym              | 2.9365 eV        | 422.21 nm        | f=0.0000        | <S**2>=0.000 |  |
| Excited State 28:        | Singlet-?Sym              | 2.9365 eV        | 422.21 nm        | f=0.0000        | <S**2>=0.000 |  |
| Excited State 29:        | Singlet-?Sym              | 3.0149 eV        | 411.24 nm        | f=0.0000        | <S**2>=0.000 |  |
| Excited State 30:        | Singlet-?Sym              | 3.0149 eV        | 411.24 nm        | f=0.0000        | <S**2>=0.000 |  |
| <b>Excited State 31:</b> | <b>Singlet-?Sym</b>       | <b>3.0609 eV</b> | <b>405.06 nm</b> | <b>f=0.0581</b> |              |  |
|                          | <b>&lt;S**2&gt;=0.000</b> |                  |                  |                 |              |  |
|                          | 626 -> 631                | 0.10376          |                  |                 |              |  |
|                          | 626 -> 633                | -0.19499         |                  |                 |              |  |
|                          | 626 -> 642                | -0.11595         |                  |                 |              |  |

627 -> 632 0.19499  
627 -> 641 0.11595  
628 -> 632 -0.10376  
629 -> 637 -0.27205  
629 -> 638 -0.20347  
630 -> 638 0.47286

**Excited State 32: Singlet-?Sym 3.0609 eV 405.06 nm f=0.0581**

**<S\*\*2>=0.000**

626 -> 631 -0.19258  
626 -> 640 0.11451  
628 -> 632 0.19258  
628 -> 641 -0.11451  
629 -> 637 0.50491  
630 -> 638 0.23217  
630 -> 639 -0.11773

**Excited State 33: Singlet-?Sym 3.0609 eV 405.06 nm f=0.0581**

**<S\*\*2>=0.000**

627 -> 631 -0.21376  
627 -> 640 -0.12711  
628 -> 633 -0.21376  
628 -> 642 0.12711  
629 -> 637 0.10136  
629 -> 639 0.33740  
630 -> 638 0.11266  
630 -> 639 0.45236

Excited State 34: Singlet-?Sym 3.0792 eV 402.64 nm f=0.0000 <S\*\*2>=0.000

Excited State 35: Singlet-?Sym 3.0792 eV 402.64 nm f=0.0000 <S\*\*2>=0.000

Excited State 36: Singlet-?Sym 3.0792 eV 402.64 nm f=0.0000 <S\*\*2>=0.000

Excited State 37: Singlet-?Sym 3.3779 eV 367.04 nm f=0.0000 <S\*\*2>=0.000

Excited State 38: Singlet-?Sym 3.3779 eV 367.04 nm f=0.0000 <S\*\*2>=0.000

Excited State 39: Singlet-?Sym 3.3779 eV 367.04 nm f=0.0000 <S\*\*2>=0.000

Excited State 40: Singlet-?Sym 3.3795 eV 366.88 nm f=0.0000 <S\*\*2>=0.000

Excited State 41: Singlet-?Sym 3.3795 eV 366.88 nm f=0.0000 <S\*\*2>=0.000

Excited State 42: Singlet-?Sym 3.3795 eV 366.88 nm f=0.0000 <S\*\*2>=0.000

Excited State 43: Singlet-?Sym 3.6128 eV 343.18 nm f=0.0000 <S\*\*2>=0.000

Excited State 44: Singlet-T2G 3.7527 eV 330.39 nm f=0.0000 <S\*\*2>=0.000

Excited State 45: Singlet-T2G 3.7527 eV 330.39 nm f=0.0000 <S\*\*2>=0.000

Excited State 46: Singlet-T2G 3.7527 eV 330.39 nm f=0.0000 <S\*\*2>=0.000

Excited State 47: Singlet-?Sym 3.7571 eV 330.00 nm f=0.0000 <S\*\*2>=0.000

Excited State 48: Singlet-?Sym 3.7571 eV 330.00 nm f=0.0000 <S\*\*2>=0.000

Excited State 49: Singlet-?Sym 3.7898 eV 327.15 nm f=0.0000 <S\*\*2>=0.000

Excited State 50: Singlet-T2U 3.7898 eV 327.15 nm f=0.0000 <S\*\*2>=0.000

Excited State 51: Singlet-T2U 3.7898 eV 327.15 nm f=0.0000 <S\*\*2>=0.000

Excited State 52: Singlet-?Sym 3.7900 eV 327.14 nm f=0.0000 <S\*\*2>=0.000

Excited State 53: Singlet-?Sym 3.7900 eV 327.14 nm f=0.0000 <S\*\*2>=0.000

Excited State 54: Singlet-?Sym 3.7900 eV 327.14 nm f=0.0000 <S\*\*2>=0.000

**Excited State 55: Singlet-?Sym 3.8841 eV 319.21 nm f=0.5596**

**<S\*\*2>=0.000**

623 -> 631 0.13881  
625 -> 638 -0.17804

626 -> 642 -0.28476  
627 -> 640 0.14820  
627 -> 641 0.28476  
628 -> 642 -0.14820  
629 -> 635 -0.15325  
630 -> 638 -0.17667

**Excited State 56: Singlet-?Sym 3.8841 eV 319.21 nm f=0.5596**

**<S\*\*2>=0.000**

624 -> 633 0.12992  
625 -> 637 0.16739  
625 -> 639 0.12482  
626 -> 640 -0.26772  
627 -> 640 -0.19963  
628 -> 641 0.26772  
628 -> 642 0.19963  
629 -> 637 0.17958  
630 -> 634 -0.15577  
630 -> 639 -0.10808

**Excited State 57: Singlet-?Sym 3.8841 eV 319.21 nm f=0.5596**

**<S\*\*2>=0.000**

625 -> 637 -0.11076  
625 -> 638 -0.10908  
625 -> 639 0.13976  
626 -> 640 0.17715  
626 -> 642 -0.17446  
627 -> 640 -0.22353  
627 -> 641 0.17446  
628 -> 641 -0.17715  
628 -> 642 0.22353  
629 -> 636 0.10498  
629 -> 637 -0.11882  
630 -> 634 0.10307  
630 -> 638 -0.10824  
630 -> 639 -0.12102

**Excited State 58: Singlet-?Sym 3.9983 eV 310.09 nm f=0.0000 <S\*\*2>=0.000**

**Excited State 59: Singlet-?Sym 4.0013 eV 309.86 nm f=0.0000 <S\*\*2>=0.000**

**Excited State 60: Singlet-?Sym 4.0013 eV 309.86 nm f=0.0000 <S\*\*2>=0.000**

**Excited State 61: Singlet-?Sym 4.0025 eV 309.76 nm f=0.0000 <S\*\*2>=0.000**

**Excited State 62: Singlet-?Sym 4.0025 eV 309.76 nm f=0.0000 <S\*\*2>=0.000**

**Excited State 63: Singlet-?Sym 4.0025 eV 309.76 nm f=0.0000 <S\*\*2>=0.000**

**Excited State 64: Singlet-?Sym 4.0224 eV 308.24 nm f=0.0000 <S\*\*2>=0.000**

**Excited State 65: Singlet-T1U 4.0283 eV 307.78 nm f=0.0091**

**<S\*\*2>=0.000**

588 -> 633 0.11614  
589 -> 642 0.13142  
591 -> 635 0.13654  
591 -> 638 0.10242  
592 -> 635 0.12768  
593 -> 634 0.12768  
593 -> 636 0.13654  
593 -> 639 0.10242  
599 -> 632 0.17414  
599 -> 633 0.18622  
601 -> 633 -0.10356

618 -> 632 -0.13554  
618 -> 633 -0.14494

**Excited State 66: Singlet-T1U 4.0283 eV 307.78 nm f=0.0091**  
**<S\*\*2>=0.000**

588 -> 640 0.14438  
589 -> 631 -0.12760  
591 -> 634 -0.14937  
591 -> 637 0.11205  
592 -> 635 0.12522  
592 -> 636 0.14937  
592 -> 639 -0.11205  
593 -> 634 0.12522  
599 -> 631 0.20372  
599 -> 632 0.17078  
600 -> 631 0.11380  
618 -> 631 -0.15857  
618 -> 632 -0.13293

**Excited State 67: Singlet-T1U 4.0283 eV 307.78 nm f=0.0091**  
**<S\*\*2>=0.000**

588 -> 633 0.11832  
588 -> 640 0.10865  
589 -> 642 0.13388  
591 -> 634 -0.11240  
591 -> 635 0.13910  
591 -> 638 0.10434  
592 -> 636 0.11240  
593 -> 636 0.13910  
593 -> 639 0.10434  
599 -> 631 0.15330  
599 -> 632 -0.11994  
599 -> 633 0.18971  
601 -> 633 -0.10551  
618 -> 631 -0.11932  
618 -> 633 -0.14766

Excited State 68: Singlet-T1G 4.0435 eV 306.63 nm f=0.0000 <S\*\*2>=0.000  
Excited State 69: Singlet-T1G 4.0435 eV 306.63 nm f=0.0000 <S\*\*2>=0.000  
Excited State 70: Singlet-T1G 4.0435 eV 306.63 nm f=0.0000 <S\*\*2>=0.000  
Excited State 71: Singlet-?Sym 4.0592 eV 305.44 nm f=0.0000 <S\*\*2>=0.000  
Excited State 72: Singlet-?Sym 4.0592 eV 305.44 nm f=0.0000 <S\*\*2>=0.000  
Excited State 73: Singlet-?Sym 4.0592 eV 305.44 nm f=0.0000 <S\*\*2>=0.000  
Excited State 74: Singlet-?Sym 4.0837 eV 303.61 nm f=0.0000 <S\*\*2>=0.000  
Excited State 75: Singlet-?Sym 4.0837 eV 303.61 nm f=0.0000 <S\*\*2>=0.000  
Excited State 76: Singlet-?Sym 4.0837 eV 303.61 nm f=0.0000 <S\*\*2>=0.000  
Excited State 77: Singlet-T1G 4.0930 eV 302.92 nm f=0.0000 <S\*\*2>=0.000  
Excited State 78: Singlet-T1G 4.0930 eV 302.92 nm f=0.0000 <S\*\*2>=0.000  
Excited State 79: Singlet-T1G 4.0930 eV 302.92 nm f=0.0000 <S\*\*2>=0.000  
Excited State 80: Singlet-?Sym 4.0956 eV 302.73 nm f=0.0000 <S\*\*2>=0.000  
Excited State 81: Singlet-?Sym 4.0956 eV 302.73 nm f=0.0000 <S\*\*2>=0.000  
Excited State 82: Singlet-?Sym 4.0956 eV 302.73 nm f=0.0000 <S\*\*2>=0.000

**Excited State 83: Singlet-?Sym 4.1001 eV 302.39 nm f=0.0302**  
**<S\*\*2>=0.000**

590 -> 634 -0.12724

|            |          |
|------------|----------|
| 590 -> 636 | 0.11150  |
| 594 -> 631 | 0.15796  |
| 594 -> 633 | 0.10031  |
| 595 -> 631 | 0.13842  |
| 595 -> 632 | 0.10031  |
| 596 -> 632 | -0.15796 |
| 596 -> 633 | 0.13842  |
| 597 -> 636 | -0.10118 |
| 597 -> 637 | 0.12556  |
| 598 -> 639 | 0.13796  |
| 601 -> 633 | -0.10465 |
| 605 -> 634 | -0.11246 |
| 618 -> 632 | -0.10606 |
| 618 -> 633 | -0.12102 |

**Excited State 84: Singlet-?Sym 4.1001 eV 302.39 nm f=0.0302**  
**<S\*\*2>=0.000**

|            |          |
|------------|----------|
| 590 -> 635 | 0.11634  |
| 590 -> 636 | -0.13900 |
| 594 -> 633 | 0.14442  |
| 595 -> 631 | -0.17255 |
| 595 -> 632 | 0.14442  |
| 595 -> 640 | 0.10300  |
| 596 -> 633 | -0.17255 |
| 596 -> 642 | -0.10300 |
| 597 -> 636 | 0.12612  |
| 597 -> 638 | 0.13452  |
| 598 -> 639 | -0.17198 |
| 605 -> 635 | 0.10282  |
| 605 -> 636 | -0.12285 |
| 618 -> 631 | 0.11065  |
| 618 -> 632 | 0.13221  |

**Excited State 85: Singlet-?Sym 4.1001 eV 302.39 nm f=0.0302**  
**<S\*\*2>=0.000**

|            |          |
|------------|----------|
| 590 -> 634 | -0.12909 |
| 590 -> 635 | -0.12283 |
| 594 -> 631 | 0.16026  |
| 594 -> 633 | -0.15249 |
| 595 -> 632 | -0.15249 |
| 596 -> 632 | -0.16026 |
| 597 -> 637 | 0.12739  |
| 597 -> 638 | -0.14203 |
| 598 -> 635 | 0.10416  |
| 600 -> 631 | 0.10148  |
| 601 -> 633 | -0.10617 |
| 605 -> 634 | -0.11409 |
| 605 -> 635 | -0.10857 |
| 618 -> 631 | -0.11684 |
| 618 -> 633 | -0.12278 |

Excited State 86: Singlet-?Sym 4.1232 eV 300.70 nm f=0.0000 <S\*\*2>=0.000  
Excited State 87: Singlet-?Sym 4.1232 eV 300.70 nm f=0.0000 <S\*\*2>=0.000  
Excited State 88: Singlet-T1G 4.1371 eV 299.69 nm f=0.0000 <S\*\*2>=0.000  
Excited State 89: Singlet-T1G 4.1371 eV 299.69 nm f=0.0000 <S\*\*2>=0.000  
Excited State 90: Singlet-T1G 4.1371 eV 299.69 nm f=0.0000 <S\*\*2>=0.000  
Excited State 91: Singlet-?Sym 4.1373 eV 299.67 nm f=0.0000 <S\*\*2>=0.000



Excited State 92: Singlet-?Sym 4.1373 eV 299.67 nm f=0.0000 <S\*\*2>=0.000  
Excited State 93: Singlet-?Sym 4.1373 eV 299.67 nm f=0.0000 <S\*\*2>=0.000  
Excited State 94: Singlet-?Sym 4.1438 eV 299.21 nm f=0.0000 <S\*\*2>=0.000  
Excited State 95: Singlet-?Sym 4.1438 eV 299.21 nm f=0.0000 <S\*\*2>=0.000  
Excited State 96: Singlet-?Sym 4.1438 eV 299.21 nm f=0.0000 <S\*\*2>=0.000  
**Excited State 97: Singlet-T1U 4.1452 eV 299.10 nm f=0.0704**

**<S\*\*2>=0.000**

|            |          |
|------------|----------|
| 588 -> 632 | -0.11386 |
| 588 -> 641 | 0.10012  |
| 589 -> 632 | 0.11206  |
| 589 -> 641 | 0.10173  |
| 592 -> 635 | 0.15749  |
| 592 -> 638 | -0.11453 |
| 593 -> 634 | 0.15748  |
| 593 -> 637 | 0.11453  |
| 599 -> 632 | 0.25213  |
| 600 -> 632 | 0.17720  |
| 601 -> 632 | -0.18017 |
| 603 -> 635 | -0.11576 |
| 604 -> 634 | -0.11576 |
| 615 -> 635 | -0.13216 |
| 617 -> 634 | 0.13216  |
| 618 -> 632 | 0.19749  |

**Excited State 98: Singlet-T1U 4.1452 eV 299.10 nm f=0.0704**

**<S\*\*2>=0.000**

|            |          |
|------------|----------|
| 588 -> 640 | 0.11064  |
| 589 -> 631 | -0.12382 |
| 591 -> 634 | -0.12611 |
| 592 -> 636 | 0.12611  |
| 599 -> 631 | 0.20190  |
| 599 -> 633 | 0.15159  |
| 600 -> 631 | -0.19589 |
| 601 -> 633 | 0.14643  |
| 615 -> 636 | -0.10583 |
| 616 -> 634 | -0.10583 |
| 618 -> 631 | 0.15815  |
| 618 -> 633 | 0.11874  |

**Excited State 99: Singlet-T1U 4.1452 eV 299.10 nm f=0.0704**

**<S\*\*2>=0.000**

|            |          |
|------------|----------|
| 588 -> 633 | -0.12303 |
| 589 -> 642 | -0.10993 |
| 591 -> 635 | -0.12584 |
| 593 -> 636 | -0.12584 |
| 599 -> 631 | 0.15191  |
| 599 -> 633 | -0.20147 |
| 600 -> 631 | -0.14739 |
| 601 -> 633 | -0.19460 |
| 616 -> 635 | -0.10561 |
| 617 -> 636 | -0.10561 |
| 618 -> 631 | 0.11899  |
| 618 -> 633 | -0.15781 |

Excited State 100: Singlet-?Sym 4.2202 eV 293.79 nm f=0.0000 <S\*\*2>=0.000

Excited State 101: Singlet-?Sym 4.2202 eV 293.79 nm f=0.0000 <S\*\*2>=0.000

Excited State 102: Singlet-T2U 4.2202 eV 293.79 nm f=0.0000 <S\*\*2>=0.000  
 Excited State 103: Singlet-T2G 4.2406 eV 292.38 nm f=0.0000 <S\*\*2>=0.000  
 Excited State 104: Singlet-T2G 4.2406 eV 292.38 nm f=0.0000 <S\*\*2>=0.000  
 Excited State 105: Singlet-T2G 4.2406 eV 292.38 nm f=0.0000 <S\*\*2>=0.000  
 Excited State 106: Singlet-?Sym 4.3137 eV 287.42 nm f=0.0000 <S\*\*2>=0.000  
 Excited State 107: Singlet-?Sym 4.3514 eV 284.93 nm f=0.0000 <S\*\*2>=0.000  
 Excited State 108: Singlet-?Sym 4.3956 eV 282.06 nm f=0.0000 <S\*\*2>=0.000  
 Excited State 109: Singlet-?Sym 4.3956 eV 282.06 nm f=0.0000 <S\*\*2>=0.000  
 Excited State 110: Singlet-?Sym 4.3956 eV 282.06 nm f=0.0000 <S\*\*2>=0.000

**Excited State 111: Singlet-?Sym 4.4237 eV 280.27 nm f=2.6106**  
**<S\*\*2>=0.000**

619 -> 642 0.11327  
 620 -> 635 0.21376  
 620 -> 638 0.10935  
 622 -> 636 0.21376  
 622 -> 639 0.10935  
 623 -> 633 0.10852  
 624 -> 633 0.39204  
 626 -> 640 0.19271  
 628 -> 641 -0.19271

**Excited State 112: Singlet-?Sym 4.4237 eV 280.27 nm f=2.6107**  
**<S\*\*2>=0.000**

619 -> 640 -0.10679  
 620 -> 634 -0.20152  
 620 -> 637 0.10309  
 621 -> 636 -0.20152  
 621 -> 639 0.10309  
 623 -> 631 0.37123  
 623 -> 632 -0.13114  
 624 -> 632 0.13332  
 626 -> 642 0.18169  
 627 -> 641 -0.18169

**Excited State 113: Singlet-?Sym 4.4237 eV 280.27 nm f=2.6107**  
**<S\*\*2>=0.000**

619 -> 641 0.10395  
 621 -> 635 0.19617  
 621 -> 638 -0.10035  
 622 -> 634 0.19617  
 622 -> 637 0.10035  
 623 -> 631 -0.16204  
 623 -> 632 -0.26178  
 624 -> 632 0.26613  
 624 -> 633 -0.12401  
 627 -> 640 -0.17686  
 628 -> 642 0.17686

Excited State 114: Singlet-?Sym 4.4579 eV 278.12 nm f=0.0000 <S\*\*2>=0.000  
 Excited State 115: Singlet-?Sym 4.4579 eV 278.12 nm f=0.0000 <S\*\*2>=0.000  
 Excited State 116: Singlet-T2U 4.4615 eV 277.90 nm f=0.0000 <S\*\*2>=0.000  
 Excited State 117: Singlet-T2U 4.4615 eV 277.90 nm f=0.0000 <S\*\*2>=0.000  
 Excited State 118: Singlet-T2U 4.4615 eV 277.90 nm f=0.0000 <S\*\*2>=0.000  
 Excited State 119: Singlet-?Sym 4.4769 eV 276.94 nm f=0.0000 <S\*\*2>=0.000

Excited State 120: Singlet-?Sym 4.4769 eV 276.94 nm f=0.0000 <S\*\*2>=0.000

Cage03\_LC-wPBE\_TDDFT

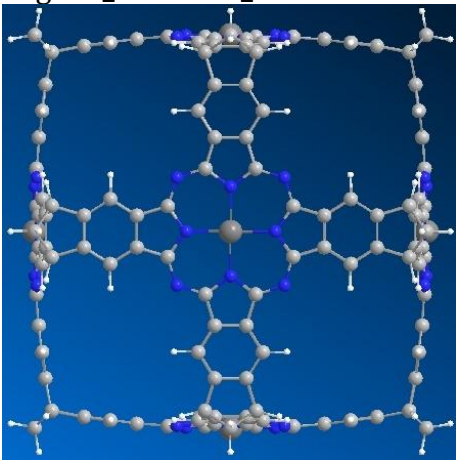

Excited State 1: Singlet-T1G 1.8446 eV 672.16 nm f=0.0000 <S\*\*2>=0.000

Excited State 2: Singlet-T1G 1.8446 eV 672.16 nm f=0.0000 <S\*\*2>=0.000

Excited State 3: Singlet-?Sym 1.8446 eV 672.16 nm f=0.00000 <S\*\*2>=0.000

Excited State 4: Singlet-T2U 1.9348 eV 640.80 nm f=0.00000 <S\*\*2>=0.000

Excited State 5: Singlet-?Sym 1.9348 eV 640.80 nm f=0.0000 <S\*\*2>=0.000

Excited State 6: Singlet-T2U 1.9348 eV 640.80 nm f=0.0000 <S\*\*2>=0.000

**Excited State 7: Singlet-T1U 2.0199 eV 613.81 nm f=1.8247**

**<S\*\*2>=0.000**

|            |          |
|------------|----------|
| 985 -> 996 | -0.16714 |
| 985 -> 999 | -0.14729 |
| 986 -> 994 | -0.10098 |
| 986 -> 996 | -0.26175 |
| 987 -> 991 | 0.22981  |
| 987 ->1002 | 0.21357  |
| 988 -> 993 | 0.22981  |
| 988 ->1001 | 0.21357  |
| 990 -> 999 | 0.26382  |

**Excited State 8: Singlet-?Sym 2.0199 eV 613.81 nm f=1.8247**

**<S\*\*2>=0.000**

|            |          |
|------------|----------|
| 985 -> 994 | -0.12225 |
| 985 -> 995 | 0.17408  |
| 985 -> 997 | 0.13249  |
| 986 -> 994 | 0.23544  |
| 987 -> 992 | -0.19631 |
| 987 ->1000 | 0.18244  |
| 988 -> 992 | -0.12895 |
| 988 ->1000 | -0.11984 |
| 989 -> 991 | -0.12895 |
| 989 -> 993 | 0.19631  |
| 989 ->1001 | -0.18244 |
| 989 ->1002 | 0.11984  |
| 990 -> 997 | 0.22536  |
| 990 -> 998 | -0.14803 |

**Excited State 9: Singlet-?Sym 2.0199 eV 613.81 nm f=1.8247**

**<S\*\*2>=0.000**

|            |          |
|------------|----------|
| 985 -> 995 | 0.28084  |
| 986 -> 994 | -0.14343 |
| 986 -> 998 | 0.15803  |
| 987 -> 992 | 0.11959  |
| 987 ->1000 | -0.11114 |
| 988 -> 992 | -0.20802 |
| 988 ->1000 | -0.19333 |
| 989 -> 991 | -0.20802 |
| 989 -> 993 | -0.11959 |
| 989 ->1001 | 0.11114  |
| 989 ->1002 | 0.19333  |
| 990 -> 997 | -0.13729 |
| 990 -> 998 | -0.23881 |

Excited State 10: Singlet-?Sym 2.0588 eV 602.23 nm f=0.0000 <S\*\*2>=0.000

Excited State 11: Singlet-?Sym 2.0588 eV 602.23 nm f=0.00000 <S\*\*2>=0.000

Excited State 12: Singlet-?Sym 2.0588 eV 602.23 nm f=0.0000 <S\*\*2>=0.000

**Excited State 13: Singlet-?Sym 3.6585 eV 338.89 nm f=0.0002**

**<S\*\*2>=0.000**

|            |          |
|------------|----------|
| 947 -> 992 | 0.12000  |
| 961 ->1000 | 0.20856  |
| 961 ->1001 | 0.12599  |
| 961 ->1002 | -0.13357 |
| 962 -> 992 | 0.21647  |
| 963 -> 991 | -0.13464 |

|            |          |
|------------|----------|
| 963 ->1000 | 0.12000  |
| 964 -> 995 | -0.13923 |
| 964 -> 998 | -0.13676 |
| 965 -> 994 | 0.13922  |
| 965 -> 997 | 0.13675  |

**Excited State 14: Singlet-?Sym 3.6585 eV 338.89 nm f=0.0002**

**<S\*\*2>=0.000**

|            |          |
|------------|----------|
| 947 -> 992 | 0.10427  |
| 961 ->1000 | 0.18123  |
| 961 ->1001 | -0.10879 |
| 961 ->1002 | 0.18037  |
| 962 -> 992 | 0.18809  |
| 962 ->1002 | -0.10079 |
| 963 -> 991 | 0.18182  |
| 963 ->1000 | 0.10428  |
| 964 -> 995 | -0.12097 |
| 964 -> 998 | -0.11882 |
| 965 -> 994 | 0.12098  |
| 965 -> 996 | -0.12040 |
| 965 -> 997 | 0.11883  |
| 965 -> 999 | 0.11826  |
| 966 -> 995 | -0.12041 |
| 966 -> 998 | 0.11827  |

**Excited State 15: Singlet-T1U 3.6585 eV 338.89 nm f=0.0002**

**<S\*\*2>=0.000**

|            |          |
|------------|----------|
| 948 -> 993 | 0.11001  |
| 955 -> 994 | -0.10308 |
| 955 -> 997 | 0.10149  |
| 957 -> 996 | -0.10308 |
| 957 -> 999 | -0.10148 |
| 961 ->1001 | 0.22249  |
| 961 ->1002 | 0.16382  |
| 962 -> 993 | 0.15753  |
| 963 -> 991 | 0.16514  |
| 963 -> 993 | 0.17570  |
| 964 -> 996 | -0.14852 |
| 964 -> 999 | -0.14588 |
| 965 -> 996 | -0.10937 |
| 965 -> 999 | 0.10742  |
| 966 -> 994 | -0.14852 |
| 966 -> 995 | -0.10936 |
| 966 -> 997 | 0.14589  |
| 966 -> 998 | 0.10741  |

Excited State 16: Singlet-T1G 3.6586 eV 338.88 nm f=0.00000 <S\*\*2>=0.000

Excited State 17: Singlet-T1G 3.6586 eV 338.88 nm f=0.00000 <S\*\*2>=0.000

Excited State 18: Singlet-T1G 3.6586 eV 338.88 nm f=0.00000 <S\*\*2>=0.000

Excited State 19: Singlet-?Sym 3.6586 eV 338.88 nm f=0.00000 <S\*\*2>=0.000

Excited State 20: Singlet-T2G 3.6586 eV 338.88 nm f=0.00000 <S\*\*2>=0.000

Excited State 21: Singlet-T2G 3.6586 eV 338.88 nm f=0.00000 <S\*\*2>=0.000

Excited State 22: Singlet-T2U 3.6587 eV 338.87 nm f=0.00000 <S\*\*2>=0.000

Excited State 23: Singlet-T2U 3.6587 eV 338.87 nm f=0.00000 <S\*\*2>=0.000

Excited State 24: Singlet-T2U 3.6587 eV 338.87 nm f=0.00000 <S\*\*2>=0.000

Excited State 25: Singlet-T1G 3.8716 eV 320.24 nm f=0.00000 <S\*\*2>=0.000

Excited State 26: Singlet-T1G 3.8716 eV 320.24 nm f=0.0000 <S\*\*2>=0.000  
 Excited State 27: Singlet-T1G 3.8716 eV 320.24 nm f=0.0000 <S\*\*2>=0.000  
 Excited State 28: Singlet-T2U 3.8726 eV 320.16 nm f=0.0000 <S\*\*2>=0.000  
 Excited State 29: Singlet-T2U 3.8726 eV 320.16 nm f=0.0000 <S\*\*2>=0.000  
 Excited State 30: Singlet-T2U 3.8726 eV 320.16 nm f=0.00000 <S\*\*2>=0.000  
 Excited State 31: Singlet-?Sym 3.8755 eV 319.92 nm f=0.0000 <S\*\*2>=0.000  
 Excited State 32: Singlet-?Sym 3.9057 eV 317.44 nm f=0.0000 <S\*\*2>=0.000  
 Excited State 33: Singlet-?Sym 3.9057 eV 317.44 nm f=0.0000 <S\*\*2>=0.000  
 Excited State 34: Singlet-?Sym 3.9227 eV 316.07 nm f=0.0000 <S\*\*2>=0.000  
 Excited State 35: Singlet-?Sym 3.9227 eV 316.07 nm f=0.0000 <S\*\*2>=0.000  
 Excited State 36: Singlet-?Sym 3.9235 eV 316.00 nm f=0.00000 <S\*\*2>=0.000

**Excited State 37: Singlet-T1U 3.9266 eV 315.75 nm f=0.0007**

**<S\*\*2>=0.000**

985 -> 997 -0.16917  
 986 -> 994 -0.14252  
 987 -> 992 0.21098  
 987 ->1000 0.15197  
 989 -> 993 -0.21098  
 989 ->1001 -0.15197  
 990 -> 997 0.43209  
 990 -> 998 -0.11616  
 990 -> 999 0.20106

**Excited State 38: Singlet-T1U 3.9266 eV 315.75 nm f=0.0007**

**<S\*\*2>=0.000**

985 -> 999 0.16543  
 986 -> 996 0.13937  
 986 -> 999 -0.10563  
 987 -> 991 -0.21725  
 987 ->1002 0.15648  
 988 -> 993 -0.21725  
 988 ->1001 0.15648  
 990 -> 997 -0.17961  
 990 -> 998 0.10201  
 990 -> 999 0.44492

**Excited State 39: Singlet-T1U 3.9266 eV 315.75 nm f=0.0007**

**<S\*\*2>=0.000**

985 -> 995 0.17284  
 986 -> 998 0.20517  
 988 -> 992 -0.22731  
 988 ->1000 0.16373  
 989 -> 991 -0.22731  
 989 ->1002 -0.16373  
 990 -> 997 0.14718  
 990 -> 998 0.46553

Excited State 40: Singlet-T2G 3.9284 eV 315.61 nm f=0.0000 <S\*\*2>=0.000  
 Excited State 41: Singlet-T2G 3.9284 eV 315.61 nm f=0.0000 <S\*\*2>=0.000  
 Excited State 42: Singlet-T2G 3.9284 eV 315.61 nm f=0.0000 <S\*\*2>=0.000  
 Excited State 43: Singlet-?Sym 3.9290 eV 315.56 nm f=0.0000 <S\*\*2>=0.000  
 Excited State 44: Singlet-?Sym 3.9290 eV 315.56 nm f=0.00000 <S\*\*2>=0.000  
 Excited State 45: Singlet-?Sym 3.9290 eV 315.56 nm f=0.00000 <S\*\*2>=0.000

**Excited State 46: Singlet-T1U 3.9400 eV 314.68 nm f=0.0756**

**<S\*\*2>=0.000**

|            |          |
|------------|----------|
| 985 -> 995 | 0.10607  |
| 985 -> 999 | 0.13866  |
| 986 -> 996 | 0.11102  |
| 986 -> 998 | 0.13248  |
| 987 -> 991 | 0.22502  |
| 987 ->1002 | -0.20715 |
| 988 -> 992 | 0.18138  |
| 988 -> 993 | 0.22502  |
| 988 ->1000 | -0.16697 |
| 988 ->1001 | -0.20715 |
| 989 -> 991 | 0.18138  |
| 989 ->1002 | 0.16697  |
| 990 -> 998 | 0.19791  |
| 990 -> 999 | 0.24553  |

**Excited State 47: Singlet-T1U 3.9400 eV 314.68 nm f=0.0757**

**<S\*\*2>=0.000**

|            |          |
|------------|----------|
| 985 -> 995 | 0.11804  |
| 985 -> 999 | -0.11134 |
| 986 -> 998 | 0.14743  |
| 987 -> 991 | -0.18069 |
| 987 -> 992 | 0.10752  |
| 987 ->1002 | 0.16634  |
| 988 -> 992 | 0.20184  |
| 988 -> 993 | -0.18069 |
| 988 ->1000 | -0.18582 |
| 988 ->1001 | 0.16634  |
| 989 -> 991 | 0.20184  |
| 989 -> 993 | -0.10752 |
| 989 ->1002 | 0.18582  |
| 990 -> 997 | -0.11732 |
| 990 -> 998 | 0.22024  |
| 990 -> 999 | -0.19716 |

**Excited State 48: Singlet-T1U 3.9400 eV 314.68 nm f=0.0756**

**<S\*\*2>=0.000**

|            |          |
|------------|----------|
| 985 -> 997 | -0.17408 |
| 986 -> 994 | -0.13938 |
| 987 -> 992 | -0.26828 |
| 987 ->1000 | -0.24698 |
| 988 -> 992 | 0.10636  |
| 989 -> 991 | 0.10636  |
| 989 -> 993 | 0.26828  |
| 989 ->1001 | 0.24698  |
| 990 -> 997 | 0.29273  |
| 990 -> 998 | 0.11605  |

**Excited State 49: Singlet-?Sym 3.9631 eV 312.85 nm f=0.0000 <S\*\*2>=0.000**

**Excited State 50: Singlet-?Sym 3.9633 eV 312.83 nm f=0.0000 <S\*\*2>=0.000**

**Excited State 51: Singlet-?Sym 3.9633 eV 312.83 nm f=0.00000 <S\*\*2>=0.000**

**Excited State 52: Singlet-?Sym 3.9633 eV 312.83 nm f=0.00000 <S\*\*2>=0.000**

**Excited State 53: Singlet-?Sym 3.9634 eV 312.83 nm f=0.0000 <S\*\*2>=0.000**

**Excited State 54: Singlet-?Sym 3.9634 eV 312.83 nm f=0.0000 <S\*\*2>=0.000**

**Excited State 55: Singlet-?Sym 3.9946 eV 310.38 nm f=0.00000 <S\*\*2>=0.000**

Excited State 56: Singlet-?Sym 3.9946 eV 310.38 nm f=0.0000 <S\*\*2>=0.000  
 Excited State 57: Singlet-?Sym 3.9946 eV 310.38 nm f=0.0000 <S\*\*2>=0.000  
 Excited State 58: Singlet-?Sym 3.9965 eV 310.23 nm f=0.0000 <S\*\*2>=0.000  
 Excited State 59: Singlet-?Sym 3.9965 eV 310.23 nm f=0.00000 <S\*\*2>=0.000  
 Excited State 60: Singlet-?Sym 3.9965 eV 310.23 nm f=0.0000 <S\*\*2>=0.000  
 Excited State 61: Singlet-?Sym 4.0042 eV 309.63 nm f=0.00000 <S\*\*2>=0.000  
 Excited State 62: Singlet-?Sym 4.0042 eV 309.63 nm f=0.0000 <S\*\*2>=0.000  
 Excited State 63: Singlet-?Sym 4.0087 eV 309.28 nm f=0.00000 <S\*\*2>=0.000  
 Excited State 64: Singlet-?Sym 4.0087 eV 309.28 nm f=0.00000 <S\*\*2>=0.000  
 Excited State 65: Singlet-?Sym 4.0087 eV 309.28 nm f=0.0000 <S\*\*2>=0.000  
 Excited State 66: Singlet-?Sym 4.0090 eV 309.26 nm f=0.0000 <S\*\*2>=0.000  
 Excited State 67: Singlet-?Sym 4.0090 eV 309.26 nm f=0.0000 <S\*\*2>=0.000  
 Excited State 68: Singlet-?Sym 4.0090 eV 309.26 nm f=0.0000 <S\*\*2>=0.000  
**Excited State 69: Singlet-?Sym 4.0277 eV 307.83 nm f=0.0171**  
**<S\*\*2>=0.000**  
     985 -> 996           -0.22570  
     985 -> 999            0.45577  
     986 -> 996           -0.35347  
     986 -> 999           -0.29103  
     990 -> 999           -0.10583  
**Excited State 70: Singlet-?Sym 4.0277 eV 307.83 nm f=0.0171**  
**<S\*\*2>=0.000**  
     985 -> 995           -0.42260  
     986 -> 998            0.54491  
     990 -> 998           -0.10675  
**Excited State 71: Singlet-?Sym 4.0277 eV 307.83 nm f=0.0171**  
**<S\*\*2>=0.000**  
     985 -> 994            0.19339  
     985 -> 997            0.48025  
     986 -> 994           -0.37245  
     986 -> 997            0.24936  
     990 -> 997            0.10590  
 Excited State 72: Singlet-?Sym 4.0305 eV  
 307.61 nm f=0.00000 <S\*\*2>=0.000  
 Excited State 73: Singlet-?Sym 4.0305 eV 307.61 nm f=0.00000 <S\*\*2>=0.000  
 Excited State 74: Singlet-?Sym 4.0305 eV 307.61 nm f=0.0000 <S\*\*2>=0.000  
 Excited State 75: Singlet-T2U 4.0457 eV 306.46 nm f=0.0000 <S\*\*2>=0.000



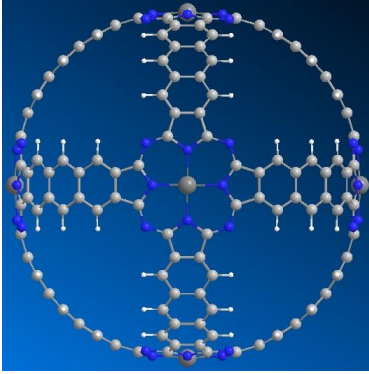

Excited State 1: Singlet-?Sym 1.2801 eV 968.58 nm f=0.0000 <S\*\*2>=0.000  
 Excited State 2: Singlet-?Sym 1.2801 eV 968.58 nm f=0.0000 <S\*\*2>=0.000  
 Excited State 3: Singlet-?Sym 1.2801 eV 968.58 nm f=0.00000 <S\*\*2>=0.000  
 Excited State 4: Singlet-?Sym 1.5102 eV 820.96 nm f=0.0000 <S\*\*2>=0.000  
 Excited State 5: Singlet-?Sym 1.5102 eV 820.96 nm f=0.00000 <S\*\*2>=0.000  
 Excited State 6: Singlet-?Sym 1.5102 eV 820.96 nm f=0.00000 <S\*\*2>=0.000

**Excited State 7: Singlet-?Sym 1.6499 eV 751.47 nm f=2.3841**

**<S\*\*2>=0.000**

937 -> 949 0.13509  
 937 -> 951 -0.10507  
 938 -> 943 -0.11081  
 938 -> 945 -0.15076  
 938 -> 954 -0.10767  
 939 -> 943 0.19383  
 939 -> 944 -0.15076  
 939 -> 952 0.13843  
 939 -> 953 -0.10767  
 940 -> 944 0.11081  
 940 -> 945 -0.19383  
 940 -> 954 0.13843  
 941 -> 946 -0.23343  
 941 -> 947 0.18957  
 941 -> 949 0.10516  
 942 -> 947 -0.23710  
 942 -> 948 0.16162  
 942 -> 951 0.10353

**Excited State 8: Singlet-?Sym 1.6499 eV 751.47 nm f=2.3840**

**<S\*\*2>=0.000**

937 -> 949 -0.12652  
 937 -> 950 -0.11425  
 938 -> 943 -0.16394  
 938 -> 945 -0.11291  
 938 -> 952 0.11708  
 939 -> 943 -0.18153  
 939 -> 944 -0.11291

939 -> 952 -0.12964  
940 -> 944 0.16394  
940 -> 945 0.18153  
940 -> 953 -0.11708  
940 -> 954 -0.12964  
941 -> 946 -0.17482  
941 -> 947 -0.17754  
941 -> 950 0.10605  
942 -> 947 0.22206  
942 -> 948 0.23912

**Excited State 9: Singlet-?Sym 1.6499 eV 751.47 nm f=2.3841**

**<S\*\*2>=0.000**

937 -> 950 0.12742  
937 -> 951 -0.13424  
938 -> 943 0.18282  
938 -> 945 -0.19262  
938 -> 952 -0.13057  
938 -> 954 -0.13756  
939 -> 944 -0.19262  
939 -> 953 -0.13756  
940 -> 944 -0.18282  
940 -> 953 0.13057  
941 -> 946 -0.29824  
941 -> 948 -0.10427  
941 -> 950 -0.11827  
942 -> 948 -0.26667  
942 -> 951 0.13228

Excited State 10: Singlet-?Sym 1.7722 eV 699.61 nm f=0.0000 <S\*\*2>=0.000  
Excited State 11: Singlet-?Sym 1.7722 eV 699.61 nm f=0.00000 <S\*\*2>=0.000  
Excited State 12: Singlet-?Sym 1.7722 eV 699.61 nm f=0.0000 <S\*\*2>=0.000  
Excited State 13: Singlet-?Sym 2.7209 eV 455.67 nm f=0.00000 <S\*\*2>=0.000  
Excited State 14: Singlet-?Sym 2.7209 eV 455.67 nm f=0.0000 <S\*\*2>=0.000  
Excited State 15: Singlet-?Sym 2.7209 eV 455.67 nm f=0.0000 <S\*\*2>=0.000  
Excited State 16: Singlet-?Sym 2.7612 eV 449.03 nm f=0.0000 <S\*\*2>=0.000  
Excited State 17: Singlet-?Sym 2.8079 eV 441.56 nm f=0.0000 <S\*\*2>=0.000  
Excited State 18: Singlet-?Sym 2.8079 eV 441.56 nm f=0.00000 <S\*\*2>=0.000  
Excited State 19: Singlet-?Sym 2.8287 eV 438.31 nm f=0.00000 <S\*\*2>=0.000  
Excited State 20: Singlet-?Sym 2.8287 eV 438.31 nm f=0.0000 <S\*\*2>=0.000  
Excited State 21: Singlet-?Sym 2.8287 eV 438.31 nm f=0.0000 <S\*\*2>=0.000  
Excited State 22: Singlet-?Sym 2.8301 eV 438.10 nm f=0.0000 <S\*\*2>=0.000  
Excited State 23: Singlet-?Sym 2.8703 eV 431.95 nm f=0.00000 <S\*\*2>=0.000  
Excited State 24: Singlet-?Sym 2.8703 eV 431.95 nm f=0.00000 <S\*\*2>=0.000  
Excited State 25: Singlet-?Sym 2.8703 eV 431.95 nm f=0.0000 <S\*\*2>=0.000

**Excited State 26: Singlet-?Sym 2.9115 eV 425.84 nm f=0.4458**

**<S\*\*2>=0.000**

939 -> 943 -0.10000

940 -> 945 0.10000  
941 -> 946 -0.25387  
941 -> 947 0.18276  
941 -> 949 -0.22732  
941 -> 964 -0.13568  
942 -> 947 -0.22858  
942 -> 949 -0.18175  
942 -> 951 -0.25247  
942 -> 966 -0.12216

**Excited State 27: Singlet-?Sym 2.9115 eV 425.84 nm f=0.4459**

**<S\*\*2>=0.000**

941 -> 946 0.24774  
941 -> 947 0.13724  
941 -> 949 -0.17071  
941 -> 950 -0.18639  
941 -> 964 0.13240  
942 -> 947 -0.17165  
942 -> 948 0.18742  
942 -> 949 -0.13649  
942 -> 951 0.24637  
942 -> 965 -0.10016

**Excited State 28: Singlet-?Sym 2.9115 eV 425.84 nm f=0.4459**

**<S\*\*2>=0.000**

938 -> 943 -0.11389  
938 -> 959 -0.10501  
940 -> 944 0.11389  
940 -> 958 0.10501  
941 -> 946 0.14947  
941 -> 948 -0.12138  
941 -> 949 -0.10316  
941 -> 950 0.30871  
942 -> 947 -0.10373  
942 -> 948 -0.31042  
942 -> 950 -0.12071  
942 -> 951 0.14865  
942 -> 965 0.16590

Excited State 29: Singlet-?Sym 3.0164 eV 411.03 nm f=0.0000 <S\*\*2>=0.000  
Excited State 30: Singlet-?Sym 3.0164 eV 411.03 nm f=0.0000 <S\*\*2>=0.000  
Excited State 31: Singlet-?Sym 3.0164 eV 411.03 nm f=0.0000 <S\*\*2>=0.000  
Excited State 32: Singlet-?Sym 3.0489 eV 406.65 nm f=0.0000 <S\*\*2>=0.000  
Excited State 33: Singlet-?Sym 3.0489 eV 406.65 nm f=0.0000 <S\*\*2>=0.000  
Excited State 34: Singlet-?Sym 3.0582 eV 405.42 nm f=0.0000 <S\*\*2>=0.000  
Excited State 35: Singlet-?Sym 3.0582 eV 405.42 nm f=0.0000 <S\*\*2>=0.000  
Excited State 36: Singlet-?Sym 3.0693 eV 403.95 nm f=0.0000 <S\*\*2>=0.000  
Excited State 37: Singlet-?Sym 3.0693 eV 403.95 nm f=0.0000 <S\*\*2>=0.000  
Excited State 38: Singlet-?Sym 3.0693 eV 403.95 nm f=0.0000 <S\*\*2>=0.000

Excited State 39: Singlet-?Sym 3.0967 eV 400.37 nm f=0.00000 <S\*\*2>=0.000  
Excited State 40: Singlet-?Sym 3.0967 eV 400.37 nm f=0.00000 <S\*\*2>=0.000  
Excited State 41: Singlet-?Sym 3.0967 eV 400.37 nm f=0.00000 <S\*\*2>=0.000  
Excited State 42: Singlet-?Sym 3.1036 eV 399.49 nm f=0.00000 <S\*\*2>=0.000

**Excited State 43: Singlet-?Sym 3.1036 eV 399.49 nm f=0.0001**  
**<S\*\*2>=0.000**

938 -> 945 0.25528  
938 -> 954 -0.14551  
939 -> 943 -0.21007  
939 -> 944 0.25528  
939 -> 952 0.11974  
939 -> 953 -0.14552  
940 -> 945 0.21006  
940 -> 954 0.11974  
941 -> 949 0.20322  
942 -> 949 0.16248  
942 -> 951 0.31259

Excited State 44: Singlet-?Sym 3.1036 eV 399.49 nm f=0.00000 <S\*\*2>=0.000  
Excited State 45: Singlet-?Sym 3.1746 eV 390.55 nm f=0.00000 <S\*\*2>=0.000  
Excited State 46: Singlet-?Sym 3.1746 eV 390.55 nm f=0.00000 <S\*\*2>=0.000  
Excited State 47: Singlet-?Sym 3.1746 eV 390.55 nm f=0.00000 <S\*\*2>=0.000  
Excited State 48: Singlet-?Sym 3.1779 eV 390.14 nm f=0.00000 <S\*\*2>=0.000  
Excited State 49: Singlet-?Sym 3.1999 eV 387.46 nm f=0.00000 <S\*\*2>=0.000  
Excited State 50: Singlet-?Sym 3.1999 eV 387.46 nm f=0.00000 <S\*\*2>=0.000  
Excited State 51: Singlet-?Sym 3.1999 eV 387.46 nm f=0.00000 <S\*\*2>=0.000  
Excited State 52: Singlet-?Sym 3.2246 eV 384.49 nm f=0.00000 <S\*\*2>=0.000  
Excited State 53: Singlet-T2U 3.2770 eV 378.35 nm f=0.00000 <S\*\*2>=0.000  
Excited State 54: Singlet-?Sym 3.2770 eV 378.35 nm f=0.00000 <S\*\*2>=0.000  
Excited State 55: Singlet-?Sym 3.2770 eV 378.35 nm f=0.00000 <S\*\*2>=0.000  
Excited State 56: Singlet-?Sym 3.2913 eV 376.70 nm f=0.00000 <S\*\*2>=0.000  
Excited State 57: Singlet-?Sym 3.2913 eV 376.70 nm f=0.00000 <S\*\*2>=0.000  
Excited State 58: Singlet-?Sym 3.3055 eV 375.08 nm f=0.00000 <S\*\*2>=0.000  
Excited State 59: Singlet-?Sym 3.3271 eV 372.65 nm f=0.00000 <S\*\*2>=0.000  
Excited State 60: Singlet-?Sym 3.3271 eV 372.65 nm f=0.00000 <S\*\*2>=0.000

**Excited State 61: Singlet-?Sym 3.3465 eV 370.49 nm f=0.0430**  
**<S\*\*2>=0.000**

937 -> 950 -0.13084  
938 -> 943 0.14726  
938 -> 959 -0.16335  
938 -> 963 0.14982  
940 -> 944 -0.14726  
940 -> 958 0.16335  
940 -> 961 -0.14983  
941 -> 950 -0.21461  
941 -> 965 0.11956  
942 -> 948 0.13869

942 -> 965 0.30576

942 -> 966 0.10258

**Excited State 62: Singlet-?Sym 3.3465 eV 370.49 nm f=0.0430**

**<S\*\*2>=0.000**

931 -> 956 -0.10747

937 -> 949 0.12925

939 -> 943 -0.14548

939 -> 959 0.16137

939 -> 963 0.14800

940 -> 945 0.14548

940 -> 957 -0.16137

940 -> 962 -0.14801

941 -> 949 -0.17780

941 -> 966 -0.20253

942 -> 947 -0.11490

942 -> 949 -0.14215

942 -> 965 -0.11030

942 -> 966 0.25331

**Excited State 63: Singlet-?Sym 3.3465 eV 370.49 nm f=0.0430**

**<S\*\*2>=0.000**

930 -> 955 0.10394

937 -> 951 -0.13655

938 -> 945 0.15369

938 -> 957 -0.17049

938 -> 962 0.15637

939 -> 944 0.15370

939 -> 958 -0.17049

939 -> 961 -0.15637

941 -> 946 -0.15366

941 -> 964 0.33875

942 -> 951 -0.23777

**Excited State 64: Singlet-?Sym 3.4116 eV 363.42 nm f=0.1660**

**<S\*\*2>=0.000**

937 -> 950 -0.19269

938 -> 952 0.27124

938 -> 954 -0.10430

939 -> 953 -0.10430

940 -> 953 -0.27124

941 -> 946 0.12533

941 -> 948 -0.12006

941 -> 950 -0.16815

942 -> 948 -0.30705

**Excited State 65: Singlet-?Sym 3.4116 eV 363.42 nm f=0.1659**

**<S\*\*2>=0.000**

937 -> 949 -0.19617

938 -> 954 -0.10678

|                           |                                                         |
|---------------------------|---------------------------------------------------------|
| 939 -> 952                | -0.27615                                                |
| 939 -> 953                | -0.10678                                                |
| 940 -> 954                | -0.27615                                                |
| 941 -> 946                | 0.12831                                                 |
| 941 -> 947                | 0.20961                                                 |
| 941 -> 949                | 0.14357                                                 |
| 942 -> 947                | -0.26216                                                |
| 942 -> 949                | 0.11479                                                 |
| <b>Excited State 66:</b>  | <b>Singlet-?Sym 3.4116 eV 363.42 nm f=0.1660</b>        |
| <b>&lt;S**2&gt;=0.000</b> |                                                         |
| 937 -> 951                | 0.18221                                                 |
| 938 -> 952                | 0.11869                                                 |
| 938 -> 954                | 0.25649                                                 |
| 939 -> 953                | 0.25649                                                 |
| 940 -> 953                | -0.11869                                                |
| 941 -> 946                | -0.30821                                                |
| 942 -> 948                | -0.13436                                                |
| 942 -> 951                | 0.16879                                                 |
| Excited State 67:         | Singlet-?Sym 3.4225 eV 362.26 nm f=0.0000 <S**2>=0.000  |
| Excited State 68:         | Singlet-?Sym 3.4225 eV 362.26 nm f=0.00000 <S**2>=0.000 |
| Excited State 69:         | Singlet-?Sym 3.4225 eV 362.26 nm f=0.00000 <S**2>=0.000 |
| Excited State 70:         | Singlet-?Sym 3.5521 eV 349.04 nm f=0.0000 <S**2>=0.000  |
| Excited State 71:         | Singlet-?Sym 3.5521 eV 349.04 nm f=0.00000 <S**2>=0.000 |
| Excited State 72:         | Singlet-?Sym 3.5521 eV 349.04 nm f=0.0000 <S**2>=0.000  |
| Excited State 73:         | Singlet-?Sym 3.6200 eV 342.50 nm f=0.0000 <S**2>=0.000  |
| Excited State 74:         | Singlet-?Sym 3.6200 eV 342.50 nm f=0.0000 <S**2>=0.000  |
| Excited State 75:         | Singlet-?Sym 3.6200 eV 342.50 nm f=0.0000 <S**2>=0.000  |
| Excited State 76:         | Singlet-T2G 3.6517 eV 339.52 nm f=0.0000 <S**2>=0.000   |
| Excited State 77:         | Singlet-T2G 3.6517 eV 339.52 nm f=0.0000 <S**2>=0.000   |
| Excited State 78:         | Singlet-T2G 3.6517 eV 339.52 nm f=0.0000 <S**2>=0.000   |
| Excited State 79:         | Singlet-?Sym 3.7026 eV 334.86 nm f=0.0000 <S**2>=0.000  |
| Excited State 80:         | Singlet-?Sym 3.7128 eV 333.93 nm f=0.00000 <S**2>=0.000 |
| Excited State 81:         | Singlet-?Sym 3.7128 eV 333.93 nm f=0.0000 <S**2>=0.000  |
| Excited State 82:         | Singlet-?Sym 3.7194 eV 333.34 nm f=0.0000 <S**2>=0.000  |
| Excited State 83:         | Singlet-?Sym 3.7194 eV 333.34 nm f=0.00000 <S**2>=0.000 |
| Excited State 84:         | Singlet-?Sym 3.7194 eV 333.34 nm f=0.00000 <S**2>=0.000 |
| Excited State 85:         | Singlet-?Sym 3.7632 eV 329.46 nm f=0.0000 <S**2>=0.000  |
| Excited State 86:         | Singlet-T2G 3.7947 eV 326.73 nm f=0.0000 <S**2>=0.000   |
| Excited State 87:         | Singlet-T2G 3.7947 eV 326.73 nm f=0.0000 <S**2>=0.000   |
| Excited State 88:         | Singlet-T2G 3.7947 eV 326.73 nm f=0.0000 <S**2>=0.000   |
| Excited State 89:         | Singlet-?Sym 3.8045 eV 325.88 nm f=0.0000 <S**2>=0.000  |
| Excited State 90:         | Singlet-?Sym 3.8045 eV 325.88 nm f=0.0000 <S**2>=0.000  |

**Table S2.** Optimized parameters of unit cells used for gas adsorption calculations.

| <i>Structure</i> | <i>a, (nm)</i> | <i>b, (nm)</i> | <i>c, (nm)</i> |
|------------------|----------------|----------------|----------------|
| 1                | 1.6568         | 1.6568         | 1.6568         |
| 2                | 1.6779         | 1.6779         | 1.6779         |
| 3                | 2.1381         | 2.1381         | 2.1381         |
| 4                | 2.3008         | 2.3008         | 2.3008         |
| 5                | 1.6382         | 1.6382         | 1.6382         |
| 5t               | 1.6629         | 1.6629         | 1.3141         |
| 6                | 1.7426         | 1.7426         | 1.7426         |
| 6t               | 1.7703         | 1.7703         | 1.3100         |
| 7                | 2.0611         | 2.0611         | 2.0611         |
| 7t               | 2.0905         | 2.0905         | 1.3126         |
| 8                | 2.3740         | 2.3740         | 2.3740         |
| 8t               | 2.4100         | 2.4100         | 1.3100         |
| 9                | 1.7410         | 1.7410         | 1.7410         |
| 10               | 1.6451         | 1.6451         | 1.6451         |
